# Supplementary material for: Substituted tetrazoles with N-oxide moiety: critical assessment of thermochemical properties
Source: Royal Society of Chemistry journal article supplement (doi:10.1039/d3cp05144g), 2023-01-01
Supplement: d3cp05144g1.pdf [file d3cp05144g1.pdf]

## Substituted tetrazoles with *N*-oxide moiety: critical assessment of thermochemical properties

Dmitry V. Khakimov,\* Leonid L. Fershtat,\* and Tatyana S. Pivina  
N. D. Zelinsky Institute of Organic Chemistry, Russian Academy of Sciences,  
119991 Moscow, Russian Federation.

E-mail: [7933765@mail.ru](mailto:7933765@mail.ru) (D.V.K.), [fershtat@bk.ru](mailto:fershtat@bk.ru) (L.L.F.)

Table of Contents:

**S1.** The structures of ionic and neutral parts for calculations.

**S2.** Lattice energy minimization.

Table **S3.** Literature values for atomic  $H^\circ$  and  $\Delta H_f^\circ$  (kcal mol<sup>-1</sup>).

Table **S4.** Fitting coefficients for VBT method for salts  $M_pX_q$  (q:p).

Table **S5.** Atom-atom potentials LJ 6-12.

**S6.** Optimized crystal structure coordinates for 5 polymorphs of Ammonium 5-nitrotetrazolate 1*N*-oxide (ionic form).

**S7.** Optimized crystal structure coordinates for 5 polymorphs of Hydroxylammonium 5-nitrotetrazolate 1*N*-oxide (ionic form).

**S8.** Optimized crystal structure coordinates for 5 polymorphs of Hydrazinium 5-nitrotetrazolate 1*N*-oxide (ionic form).

**S9.** Optimized crystal structure coordinates for 5 polymorphs of Guanidinium 5-nitrotetrazolate 1*N*-oxide (ionic form).

**S10.** Optimized crystal structure coordinates for 5 polymorphs of Aminoguanidinium 5-nitrotetrazolate 1*N*-oxide (ionic form).

**S11.** Optimized crystal structure coordinates for 5 polymorphs of Diaminoguanidinium 5-nitrotetrazolate 1*N*-oxide (ionic form).

**S12.** Optimized crystal structure coordinates for 5 polymorphs of Triaminoguanidinium 5-nitrotetrazolate 1*N*-oxide (ionic form).

**S13.** Optimized crystal structure coordinates for 5 polymorphs of Ammonium 5-(trinitromethyl)tetrazolate 1*N*-oxide (ionic form).

**S14.** Optimized crystal structure coordinates for 5 polymorphs of Hydroxylammonium 5-(trinitromethyl)tetrazolate 1*N*-oxide (ionic form).

**S15.** Optimized crystal structure coordinates for 5 polymorphs of Hydrazinium 5-(trinitromethyl)tetrazolate 1*N*-oxide (ionic form).

- S16.** Optimized crystal structure coordinates for 5 polymorphs of Guanidinium 5-(trinitromethyl)tetrazolate 1*N*-oxide (ionic form).
- S17.** Optimized crystal structure coordinates for 5 polymorphs of Aminoguanidinium 5-(trinitromethyl)tetrazolate 1*N*-oxide (ionic form).
- S18.** Optimized crystal structure coordinates for 5 polymorphs of Diaminoguanidinium 5-(trinitromethyl)tetrazolate 1*N*-oxide (ionic form).
- S19.** Optimized crystal structure coordinates for 5 polymorphs of Triaminoguanidinium 5-(trinitromethyl)tetrazolate 1*N*-oxide (ionic form).
- S20.** Optimized crystal structure coordinates for 5 polymorphs of Ammonium 6-amino-3-(1-hydroxy-1*H*-tetrazolate-5-yl)-1,2,4,5-tetrazine 1,5-dioxide (ionic form).
- S21.** Optimized crystal structure coordinates for 5 polymorphs of Hydroxylammonium 6-amino-3-(1-hydroxy-1*H*-tetrazolate-5-yl)-1,2,4,5-tetrazine 1,5-dioxide (ionic form).
- S22.** Optimized crystal structure coordinates for 5 polymorphs of Hydrazinium 6-amino-3-(1-hydroxy-1*H*-tetrazolate-5-yl)-1,2,4,5-tetrazine 1,5-dioxide (ionic form).
- S23.** Optimized crystal structure coordinates for 5 polymorphs of Guanidinium 6-amino-3-(1-hydroxy-1*H*-tetrazolate-5-yl)-1,2,4,5-tetrazine 1,5-dioxide (ionic form).
- S24.** Optimized crystal structure coordinates for 5 polymorphs of Aminoguanidinium 6-amino-3-(1-hydroxy-1*H*-tetrazolate-5-yl)-1,2,4,5-tetrazine 1,5-dioxide (ionic form).
- S25.** Optimized crystal structure coordinates for 5 polymorphs of Diaminoguanidinium 6-amino-3-(1-hydroxy-1*H*-tetrazolate-5-yl)-1,2,4,5-tetrazine 1,5-dioxide (ionic form).
- S26.** Optimized crystal structure coordinates for 5 polymorphs of Triaminoguanidinium 6-amino-3-(1-hydroxy-1*H*-tetrazolate-5-yl)-1,2,4,5-tetrazine 1,5-dioxide (ionic form).
- S27.** Optimized crystal structure coordinates for 5 polymorphs of Ammonia - 5-nitrotetrazole 1*N*-oxide (cocrystal form).
- S28.** Optimized crystal structure coordinates for 5 polymorphs of Hydroxylamine - 5-nitrotetrazole 1*N*-oxide (cocrystal form).
- S29.** Optimized crystal structure coordinates for 5 polymorphs of Hydrazine - 5-nitrotetrazole 1*N*-oxide (cocrystal form).
- S30.** Optimized crystal structure coordinates for 5 polymorphs of Guanidine - 5-nitrotetrazole 1*N*-oxide (cocrystal form).
- S31.** Optimized crystal structure coordinates for 5 polymorphs of Aminoguanidine - 5-nitrotetrazole 1*N*-oxide (cocrystal form).
- S32.** Optimized crystal structure coordinates for 5 polymorphs of Diaminoguanidine - 5-nitrotetrazole 1*N*-oxide (cocrystal form).

- S33.** Optimized crystal structure coordinates for 5 polymorphs of Triaminoguanidine - 5-nitrotetrazole 1*N*-oxide (cocrystal form).
- S34.** Optimized crystal structure coordinates for 5 polymorphs of Ammonia - 5-(trinitromethyl)tetrazole 1*N*-oxide (cocrystal form).
- S35.** Optimized crystal structure coordinates for 5 polymorphs of Hydroxylamine - 5-(trinitromethyl)tetrazole 1*N*-oxide (cocrystal form).
- S36.** Optimized crystal structure coordinates for 5 polymorphs of Hydrazine - 5-(trinitromethyl)tetrazole 1*N*-oxide (cocrystal form).
- S37.** Optimized crystal structure coordinates for 5 polymorphs of Guanidine - 5-(trinitromethyl)tetrazole 1*N*-oxide (cocrystal form).
- S38.** Optimized crystal structure coordinates for 5 polymorphs of Aminoguanidine - 5-(trinitromethyl)tetrazole 1*N*-oxide (cocrystal form).
- S39.** Optimized crystal structure coordinates for 5 polymorphs of Diaminoguanidine - 5-(trinitromethyl)tetrazole 1*N*-oxide (cocrystal form).
- S40.** Optimized crystal structure coordinates for 5 polymorphs of Triaminoguanidine - 5-(trinitromethyl)tetrazole 1*N*-oxide (cocrystal form).
- S41.** Optimized crystal structure coordinates for 5 polymorphs of Ammonia - 6-amino-3-(1-hydroxy-1*H*-tetrazole-5-yl)-1,2,4,5-tetrazine 1,5-dioxide (cocrystal form).
- S42.** Optimized crystal structure coordinates for 5 polymorphs of Hydroxylamine - 6-amino-3-(1-hydroxy-1*H*-tetrazole-5-yl)-1,2,4,5-tetrazine 1,5-dioxide (cocrystal form).
- S43.** Optimized crystal structure coordinates for 5 polymorphs of Hydrazine - 6-amino-3-(1-hydroxy-1*H*-tetrazole-5-yl)-1,2,4,5-tetrazine 1,5-dioxide (cocrystal form).
- S44.** Optimized crystal structure coordinates for 5 polymorphs of Guanidine - 6-amino-3-(1-hydroxy-1*H*-tetrazole-5-yl)-1,2,4,5-tetrazine 1,5-dioxide (cocrystal form).
- S45.** Optimized crystal structure coordinates for 5 polymorphs of Aminoguanidine - 6-amino-3-(1-hydroxy-1*H*-tetrazole-5-yl)-1,2,4,5-tetrazine 1,5-dioxide (cocrystal form).
- S46.** Optimized crystal structure coordinates for 5 polymorphs of Diaminoguanidine - 6-amino-3-(1-hydroxy-1*H*-tetrazole-5-yl)-1,2,4,5-tetrazine 1,5-dioxide (cocrystal form).
- S47.** Optimized crystal structure coordinates for 5 polymorphs of Triaminoguanidine - 6-amino-3-(1-hydroxy-1*H*-tetrazole-5-yl)-1,2,4,5-tetrazine 1,5-dioxide (cocrystal form).

**S1.** The structures of ionic and neutral parts for calculations.

Ionic compounds

**Ammonium NH<sub>4</sub> (Point group Td)**

|   |             |             |             |
|---|-------------|-------------|-------------|
| N | 0.00000000  | 0.00000000  | 0.00000000  |
| H | 0.59365600  | 0.59365600  | 0.59365600  |
| H | -0.59365600 | -0.59365600 | 0.59365600  |
| H | -0.59365600 | 0.59365600  | -0.59365600 |
| H | 0.59365600  | -0.59365600 | -0.59365600 |

**Hydroxylammonium NH<sub>3</sub>OH (Point group Cs)**

|   |             |             |             |
|---|-------------|-------------|-------------|
| N | -0.04338200 | -0.62718700 | 0.00000000  |
| H | -1.04074200 | -0.88709900 | 0.00000000  |
| H | 0.40103000  | -1.01022700 | 0.85017800  |
| H | 0.40103000  | -1.01022700 | -0.85017800 |
| O | -0.04338200 | 0.77871200  | 0.00000000  |
| H | 0.88940400  | 1.06816300  | 0.00000000  |

**Hydrazinium N<sub>2</sub>H<sub>5</sub> (Point group Cs)**

|   |             |             |             |
|---|-------------|-------------|-------------|
| N | 0.04724100  | -0.66093400 | 0.00000000  |
| H | 0.57178200  | -0.98085800 | 0.82500400  |
| H | 0.57178200  | -0.98085800 | -0.82500400 |
| N | 0.04724100  | 0.78715100  | 0.00000000  |
| H | -0.46227100 | 1.09658500  | -0.82971400 |
| H | -0.46227100 | 1.09658500  | 0.82971400  |
| H | -0.88039300 | -1.11497700 | 0.00000000  |

**Guanidinium C(NH<sub>2</sub>)<sub>3</sub> (Point group D3h)**

|   |             |             |            |
|---|-------------|-------------|------------|
| C | 0.00000000  | 0.00000000  | 0.00000000 |
| N | 0.00000000  | 1.33733900  | 0.00000000 |
| H | 0.86362100  | 1.86216000  | 0.00000000 |
| H | -0.86362100 | 1.86216000  | 0.00000000 |
| N | 1.15817000  | -0.66867000 | 0.00000000 |
| H | 1.18086700  | -1.67899800 | 0.00000000 |
| H | 2.04448800  | -0.18316200 | 0.00000000 |
| N | -1.15817000 | -0.66867000 | 0.00000000 |
| H | -2.04448800 | -0.18316200 | 0.00000000 |
| H | -1.18086700 | -1.67899800 | 0.00000000 |

**Aminoguanidinium C(NH<sub>2</sub>)<sub>2</sub>(NHNH<sub>2</sub>) (Point group Cs)**

|   |             |             |            |
|---|-------------|-------------|------------|
| C | 0.00000000  | 0.50250000  | 0.00000000 |
| N | -0.69193100 | 1.64984900  | 0.00000000 |
| H | -1.70227900 | 1.65496400  | 0.00000000 |
| H | -0.22085900 | 2.54334000  | 0.00000000 |
| N | -0.66602400 | -0.66772200 | 0.00000000 |
| H | -1.68083800 | -0.66950400 | 0.00000000 |

|   |             |             |             |
|---|-------------|-------------|-------------|
| N | 1.32961600  | 0.49684400  | 0.00000000  |
| H | 1.86387300  | 1.35367100  | 0.00000000  |
| H | 1.80399400  | -0.39955000 | 0.00000000  |
| N | 0.06218700  | -1.86291000 | 0.00000000  |
| H | -0.15041100 | -2.40517300 | 0.83561800  |
| H | -0.15041100 | -2.40517300 | -0.83561800 |

**Diaminoguanidinium C(NH<sub>2</sub>)(NHNH<sub>2</sub>)<sub>2</sub> (Point group Cs)**

|   |             |             |             |
|---|-------------|-------------|-------------|
| C | 0.00000000  | 0.42334800  | 0.00000000  |
| N | -0.66359100 | -0.73941400 | 0.00000000  |
| H | -0.11522300 | -1.59545800 | 0.00000000  |
| N | 1.34779500  | 0.41043700  | 0.00000000  |
| H | 1.85920800  | 1.28633200  | 0.00000000  |
| N | -0.66640400 | 1.57722200  | 0.00000000  |
| H | -1.67961300 | 1.53894500  | 0.00000000  |
| H | -0.19131000 | 2.46772500  | 0.00000000  |
| N | 2.01554100  | -0.82037700 | 0.00000000  |
| N | -2.06488300 | -0.71966600 | 0.00000000  |
| H | -2.41745400 | -1.18774000 | 0.83292700  |
| H | 2.59131900  | -0.90978100 | -0.83488200 |
| H | 2.59131900  | -0.90978100 | 0.83488200  |
| H | -2.41745400 | -1.18774000 | -0.83292700 |

**Triaminoguanidinium C(NHNH<sub>2</sub>)<sub>3</sub> (Point group C3h)**

|   |             |             |             |
|---|-------------|-------------|-------------|
| C | 0.00000000  | 0.00000000  | 0.00000000  |
| N | 0.00000000  | 1.34062600  | 0.00000000  |
| H | -0.90095100 | 1.81139600  | 0.00000000  |
| N | 1.16101600  | -0.67031300 | 0.00000000  |
| H | 2.01919000  | -0.12545100 | 0.00000000  |
| N | -1.16101600 | -0.67031300 | 0.00000000  |
| H | -1.11823900 | -1.68594500 | 0.00000000  |
| N | 1.13400900  | -2.07136700 | 0.00000000  |
| N | 1.22685200  | 2.01776400  | 0.00000000  |
| H | 1.30228500  | 2.59965900  | 0.83237300  |
| H | 1.60022800  | -2.42764200 | -0.83237300 |
| H | 1.60022800  | -2.42764200 | 0.83237300  |
| H | 1.30228500  | 2.59965900  | -0.83237300 |
| N | -2.36086100 | 0.05360300  | 0.00000000  |
| H | -2.90251300 | -0.17201700 | -0.83237300 |
| H | -2.90251300 | -0.17201700 | 0.83237300  |

**5-nitrotetrazolate 1N-oxide (Point group Cs)**

|   |             |             |            |
|---|-------------|-------------|------------|
| C | 0.00000000  | 0.28830200  | 0.00000000 |
| N | -0.69553300 | -0.90255900 | 0.00000000 |
| N | -2.00495300 | -0.56738300 | 0.00000000 |
| N | -2.06693500 | 0.76549800  | 0.00000000 |
| N | -0.86641400 | 1.31806300  | 0.00000000 |
| O | -0.28280600 | -2.09851400 | 0.00000000 |
| N | 1.40973300  | 0.42325500  | 0.00000000 |

|   |            |             |            |
|---|------------|-------------|------------|
| O | 1.87325500 | 1.57527700  | 0.00000000 |
| O | 2.10563900 | -0.60025400 | 0.00000000 |

**5-(trinitromethyl)tetrazolate 1N-oxide (Point group C1)**

|   |             |             |             |
|---|-------------|-------------|-------------|
| C | 0.95695000  | 0.38962200  | 0.03714700  |
| N | 3.09837700  | 0.00236400  | 0.06729500  |
| N | 2.86727300  | 1.31382400  | 0.01043900  |
| N | 1.56947000  | 1.58750500  | -0.01227900 |
| N | 1.89614000  | -0.59988800 | 0.07888700  |
| C | -0.46262500 | 0.08907200  | -0.00684600 |
| N | -1.10969100 | -0.34750900 | 1.37404700  |
| O | -2.32465200 | -0.26499100 | 1.45057600  |
| O | -0.34047000 | -0.71580900 | 2.23452300  |
| N | -1.28344300 | 1.32077500  | -0.43511400 |
| O | -1.29635600 | 2.22368000  | 0.37941200  |
| O | -1.83367300 | 1.30177500  | -1.52146000 |
| N | -0.76839600 | -1.09318400 | -1.01095400 |
| O | -0.24416600 | -0.97417600 | -2.09687000 |
| O | -1.50812300 | -1.98189500 | -0.63672900 |
| O | 1.69068400  | -1.85850500 | 0.10454200  |

**6-amino-3-(1-hydroxy-1H-tetrazolate-5-yl)-1,2,4,5-tetrazine 1,5-dioxide (Point group C1)**

|   |             |             |             |
|---|-------------|-------------|-------------|
| C | -1.65685800 | -0.30538400 | -0.03718300 |
| N | -2.31632500 | -1.48145700 | -0.16605200 |
| C | -0.22317500 | -0.15824900 | -0.02726300 |
| C | 2.40909600  | 0.03545400  | 0.02834300  |
| N | -3.60325700 | -1.18569700 | -0.12538500 |
| N | -3.80710000 | 0.12230600  | 0.03270600  |
| N | -2.59115600 | 0.70302600  | 0.08867400  |
| N | 0.30268100  | 1.08633700  | -0.11048700 |
| N | 1.63014200  | 1.14875700  | -0.08080300 |
| N | 1.80040700  | -1.18677000 | 0.05802000  |
| N | 0.48318000  | -1.31739100 | 0.04787400  |
| O | -2.41742000 | 1.95082900  | 0.25144000  |
| O | 2.54870200  | -2.20985900 | 0.10090500  |
| O | 2.22023300  | 2.26678600  | -0.16715800 |
| N | 3.76291200  | 0.13913000  | 0.11783900  |
| H | 4.25567000  | -0.71919600 | -0.09885500 |
| H | 4.12744500  | 1.02853400  | -0.20272600 |

Neutral compounds

**Ammonia NH<sub>3</sub> (Point group C3v)**

|   |             |             |             |
|---|-------------|-------------|-------------|
| N | 0.00000000  | 0.00000000  | 0.11423500  |
| H | 0.00000000  | 0.94525200  | -0.26654800 |
| H | -0.81861300 | -0.47262600 | -0.26654800 |
| H | 0.81861300  | -0.47262600 | -0.26654800 |

**Hydroxylamine NH<sub>2</sub>OH (Point group Cs)**

|   |             |             |             |
|---|-------------|-------------|-------------|
| N | 0.01063600  | 0.70724500  | 0.00000000  |
| H | -0.55593400 | 0.95288800  | 0.81454000  |
| H | -0.55593400 | 0.95288800  | -0.81454000 |
| O | 0.01063600  | -0.73837300 | 0.00000000  |
| H | 0.95232800  | -0.94950500 | 0.00000000  |

**Hydrazine N<sub>2</sub>H<sub>4</sub> (Point group C2)**

|   |             |             |             |
|---|-------------|-------------|-------------|
| N | 0.00000000  | 0.71833000  | -0.07599900 |
| H | 0.23580600  | 1.10106800  | 0.83971400  |
| H | -0.94114300 | 1.02549300  | -0.30771800 |
| N | 0.00000000  | -0.71833000 | -0.07599900 |
| H | 0.94114300  | -1.02549300 | -0.30771800 |
| H | -0.23580600 | -1.10106800 | 0.83971400  |

**Guanidine CNH(NH<sub>2</sub>)<sub>2</sub> (Point group C1)**

|   |             |             |             |
|---|-------------|-------------|-------------|
| C | -0.01912000 | 0.12111000  | 0.00013300  |
| N | -0.24933100 | 1.38494000  | 0.00974500  |
| H | -1.24922700 | 1.58082900  | -0.04576400 |
| N | 1.28848500  | -0.35557200 | -0.08150100 |
| H | 1.48745900  | -1.16172600 | 0.49990100  |
| H | 1.97116000  | 0.38606200  | 0.02074600  |
| N | -0.95934000 | -0.91203100 | 0.07616400  |
| H | -1.91858600 | -0.61346600 | -0.04202300 |
| H | -0.73478200 | -1.73972000 | -0.46451600 |

**Aminoguanidine C(NH<sub>2</sub>)<sub>2</sub>(NNH<sub>2</sub>) (Point group C1)**

|   |             |             |             |
|---|-------------|-------------|-------------|
| C | -0.42374500 | -0.04091000 | 0.00031800  |
| N | -1.69182400 | -0.61647900 | -0.07859700 |
| H | -2.36709500 | -0.20785200 | 0.55892500  |
| N | 0.61852900  | -0.80685400 | 0.01612400  |
| N | -0.41340400 | 1.34230300  | 0.05991200  |
| H | -1.16658500 | 1.78862900  | -0.45009900 |
| H | 0.51093700  | 1.71042300  | -0.15451600 |
| N | 1.84455000  | -0.03704100 | -0.04870400 |
| H | 2.19232600  | 0.04999900  | 0.90916800  |
| H | 2.51627900  | -0.64308200 | -0.51596800 |
| H | -1.64835000 | -1.62616100 | 0.00943500  |

**Diaminoguanidine C(NH<sub>2</sub>)(NHNH<sub>2</sub>)(NNH<sub>2</sub>) (Point group C1)**

|   |             |             |             |
|---|-------------|-------------|-------------|
| C | -0.03763300 | 0.33546500  | -0.01358200 |
| N | -0.57909900 | -0.83784800 | -0.01329700 |
| N | 1.35338900  | 0.46486700  | -0.06360200 |
| H | 1.70302700  | 1.19990000  | 0.54117700  |
| N | -0.72001900 | 1.54198100  | 0.05946200  |
| N | 2.15134400  | -0.70166100 | 0.05599200  |
| N | -2.01934400 | -0.76486800 | -0.05613700 |
| H | -2.35733300 | -0.68200600 | 0.90638900  |

|   |             |             |             |
|---|-------------|-------------|-------------|
| H | 1.64451600  | -1.38304100 | 0.62777900  |
| H | 2.21230400  | -1.11646200 | -0.87237700 |
| H | -2.32560600 | -1.68302700 | -0.36887000 |
| H | -0.25998600 | 2.30746800  | -0.42074400 |
| H | -1.69502300 | 1.42708000  | -0.20879000 |

**Triaminoguanidine C(NHNH<sub>2</sub>)<sub>2</sub>(NNH<sub>2</sub>) (Point group C1)**

|   |             |             |             |
|---|-------------|-------------|-------------|
| C | -0.04731500 | 0.06813800  | 0.00022700  |
| N | -0.36661700 | 1.32289300  | 0.08150800  |
| N | 0.80195900  | 2.17116500  | 0.06850800  |
| N | 1.26130800  | -0.37451200 | -0.18568400 |
| N | 1.51755700  | -1.74721000 | 0.05638100  |
| N | -1.02747200 | -0.90170600 | 0.08058300  |
| N | -2.38224000 | -0.53516500 | -0.08103700 |
| H | 0.47152200  | 3.08310700  | 0.37296600  |
| H | 1.09813100  | 2.29816400  | -0.90383900 |
| H | 1.92168400  | 0.30215800  | 0.19772600  |
| H | 2.27234800  | -2.04230200 | -0.55565200 |
| H | 1.79146700  | -1.90740700 | 1.02566300  |
| H | -0.78737800 | -1.79958100 | -0.31695700 |
| H | -2.68570100 | -0.11956000 | 0.79902100  |
| H | -2.42965300 | 0.22833500  | -0.76210700 |

**5-nitrotetrazole 1N-oxide (Point group Cs)**

|   |             |             |            |
|---|-------------|-------------|------------|
| C | 0.00000000  | 0.35341200  | 0.00000000 |
| N | -0.67579800 | -0.81485200 | 0.00000000 |
| N | -1.97836800 | -0.56092400 | 0.00000000 |
| N | -2.08993200 | 0.75050400  | 0.00000000 |
| N | -0.88518600 | 1.33787900  | 0.00000000 |
| O | -0.19273400 | -2.08588300 | 0.00000000 |
| N | 1.44696600  | 0.49773400  | 0.00000000 |
| O | 1.88158200  | 1.63617600  | 0.00000000 |
| O | 2.09526000  | -0.54459500 | 0.00000000 |
| H | -0.99663500 | -2.63845300 | 0.00000000 |

**5-(trinitromethyl)tetrazole 1N-oxide (Point group C1)**

|   |             |             |             |
|---|-------------|-------------|-------------|
| C | 0.90289300  | 0.43892700  | 0.02274000  |
| N | 3.08462700  | 0.22538400  | 0.05875200  |
| N | 2.76477000  | 1.48537800  | -0.01020500 |
| N | 1.41864500  | 1.65362700  | -0.03073100 |
| N | 1.92868300  | -0.43937000 | 0.07485200  |
| C | -0.53225400 | 0.07338300  | 0.00667400  |
| N | -1.06370700 | -0.39073300 | 1.39892700  |
| O | -2.24758900 | -0.24524300 | 1.60085600  |
| O | -0.22290500 | -0.88570700 | 2.12560400  |
| N | -1.39001700 | 1.28508200  | -0.44495400 |
| O | -1.44738400 | 2.18441600  | 0.36223600  |
| O | -1.89170500 | 1.21216900  | -1.54804700 |
| N | -0.80515200 | -1.09805000 | -0.99075000 |

|   |             |             |             |
|---|-------------|-------------|-------------|
| O | -0.06103900 | -1.13147300 | -1.95451800 |
| O | -1.72405500 | -1.84037300 | -0.73091200 |
| O | 1.85965800  | -1.79344500 | 0.16406600  |
| H | 2.09138600  | -2.12584200 | -0.72200200 |

**6-amino-3-(1-hydroxy-1*H*-tetrazole-5-yl)-1,2,4,5-tetrazine 1,5-dioxide (Point group**

**C1)**

|   |             |             |             |
|---|-------------|-------------|-------------|
| C | -1.62035300 | -0.37936300 | -0.07839400 |
| N | -2.29187200 | -1.49444300 | -0.37113700 |
| C | -0.16178500 | -0.21554000 | -0.03979800 |
| C | 2.43779800  | 0.05668000  | -0.00966500 |
| N | -3.59779400 | -1.18843700 | -0.30020500 |
| N | -3.77112900 | 0.06929400  | 0.02199200  |
| N | -2.54742200 | 0.57447200  | 0.15649800  |
| N | 0.29802900  | 1.02870900  | -0.20494900 |
| N | 1.62838500  | 1.14963100  | -0.17687500 |
| N | 1.86333400  | -1.18149200 | 0.14679700  |
| N | 0.53816600  | -1.34079500 | 0.14362600  |
| O | -2.34742300 | 1.87555600  | 0.51729600  |
| O | 2.62753000  | -2.16495600 | 0.30347900  |
| O | 2.17335300  | 2.27430500  | -0.31177800 |
| N | 3.76640800  | 0.19308300  | 0.00778000  |
| H | 4.32810500  | -0.63922100 | 0.12686600  |
| H | 4.15118600  | 1.11985600  | -0.11564100 |
| H | -3.24367700 | 2.19931100  | 0.71925500  |

**S2. Lattice energy minimization.**

The optimal geometry and distributions of electrostatic potentials of the molecules and ions were calculated on the program package Gaussian 09 using DFT method with B3LYP functional and the extended basis aug-cc-PVDZ. Grimme dispersion correction (version 2) was used (GD2). The optimized molecular structures were treated as rigid bodies throughout the lattice energy calculations in this study.

The current version of program PMC was used throughout the crystal packing calculations. In calculation of lattice energy the convergence acceleration was applied for both the r-1 electrostatic and r- 6 dispersion terms in the lattice sums with the convergence Kconv of 0.175 and the cutoff parameters Rcut=9 Å and R\*=0.5 Å for direct and reciprocal spaces, respectively. During minimization, the parameters of the unit cell and six parameters of rigid body of the crystallographically independent molecules were varied simultaneously, including three components of the center of mass and three Euler angles, while all the other molecules in the crystal environment perform the dependent motion in accordance with the symmetry group of a crystal. The local energy minimization was performed with the quasi Newton method using the Fortran subroutine VA09 A with analytical first derivatives. Each local minimum was refined

in a series of few minimization stages: at each stage (p), lists of pairs of atoms {i, j} and points of the reciprocal space {h, k, l} contributing to the approximate energy function of the lattice F(p) are not updated to ensure continuity and perfect integrity F(p) with smooth motion from the initial X0(p) to the lower point of Xmin(p); at which these lists are updated and the next minimization stage, p+1, is carried out starting from X0(p+1)=Xmin(p) down to a new minimum approximation Xmin (p+1), and etc., until the self-consistency condition Xmin (s)=Xmin (s- 1) is finally reached.

The enthalpies (H) and free energies (G) were calculated using the complete basis set (CBS) method of Petersson and coworkers in order to obtain very accurate energies. The CBS models use the known asymptotic convergence of pair natural orbital expressions to extrapolate from calculations using a finite basis set to the estimated complete basis set limit. CBS-4 begins with a HF/3-21G(d) geometry optimization; the zero point energy is computed at the same level. It then uses a large basis set SCF calculation as a base energy, and a MP2/6-31+G calculation with a CBS extrapolation to correct the energy through second order. A MP4(SDQ)/6-31+(d,p) calculation is used to approximate higher order contributions. In this study we applied the modified CBS-4M method (M referring to the use of Minimal Population localization) which is a re-parametrized version of the original CBS-4 method and also includes some additional empirical corrections. In addition, we applied G3B3 method.

The enthalpies of the gas-phase species M were computed according to the atomization energy method:

$$\Delta H_f^\circ(\text{g, M, 298}) = H(\text{Molecule, 298}) - \Sigma H^\circ(\text{Atoms, 298}) + \Sigma \Delta H_f^\circ(\text{Atoms, 298})$$

Table S3. Literature values for atomic H° and ΔH<sub>f</sub>° (kcal mol<sup>-1</sup>).

|   | H°(Atoms, 298) | ΔH <sub>f</sub> °(Atoms, 298)<br>CBS-4M | ΔH <sub>f</sub> °(Atoms, 298)<br>G3B3 |
|---|----------------|-----------------------------------------|---------------------------------------|
| H | 52.1           | -0.50099                                | -0.49872823                           |
| C | 171.3          | -37.7862                                | -37.8259642                           |
| N | 113            | -54.5225                                | -54.56280323                          |
| O | 59.6           | -74.9912                                | -75.02973288                          |

Table S4. Fitting coefficients for VBT method for salts MpXq (q:p).

| Anion:Cation | α, kcal mol <sup>-1</sup> nm <sup>-1</sup> | β, kcal mol <sup>-1</sup> |
|--------------|--------------------------------------------|---------------------------|
| <b>1:1</b>   | 117.3                                      | 51.9                      |
| <b>2:1</b>   | 133.5                                      | 60.9                      |
| <b>1:2</b>   | 165.3                                      | -29.8                     |
| <b>2:2</b>   | 101.6                                      | 91.5                      |

Table S5. Atom-atom potentials LJ 6-12.

| Atom 1 | Atom 2 | r, Å  | E, kcal mol <sup>-1</sup> |
|--------|--------|-------|---------------------------|
| H      | H      | 2.930 | -0.0359                   |
| H      | C      | 3.315 | -0.0474                   |
| H      | N      | 3.460 | -0.0357                   |
| H      | O      | 3.025 | -0.0795                   |
| H      | N'     | 3.460 | -0.0357                   |
| H      | H*     | 2.805 | -0.0467                   |
| C      | C      | 3.700 | -0.0722                   |
| C      | N      | 3.845 | -0.0567                   |
| C      | O      | 3.410 | -0.1170                   |
| C      | N'     | 3.845 | -0.0567                   |
| C      | H*     | 3.190 | -0.0597                   |
| N      | N      | 3.990 | -0.0450                   |
| N      | O      | 3.555 | -0.0906                   |
| N      | N'     | 3.990 | -0.0450                   |
| N      | H*     | 3.335 | -0.0445                   |
| O      | O      | 3.120 | -0.2001                   |
| O      | N'     | 3.555 | -0.0906                   |
| O      | H*     | 1.900 | -1.1100                   |
| N'     | N'     | 3.990 | -0.0450                   |
| N'     | H*     | 1.960 | -0.9000                   |
| H*     | H*     | 2.680 | -0.0614                   |

N' - N(sp<sup>2</sup>); H\* - H which form hydrogen-bonds.

**S6.** Optimized crystal structure coordinates for 5 polymorphs of Ammonium 5-nitrotetrazolate 1*N*-oxide (ionic form).

```

data_1a_1
_symmetry_cell_setting      orthorhombic
_symmetry_space_group_name_H-M 'P b c a'
_symmetry_Int_Tables_number 61
loop_
_symmetry_equiv_pos_site_id
_symmetry_equiv_pos_as_xyz
1 x,y,z
2 1/2-x,1/2+y,z
3 x,1/2-y,1/2+z
4 1/2-x,-y,1/2+z
5 -x,-y,-z
6 1/2+x,1/2-y,-z
7 -x,1/2+y,1/2-z
8 1/2+x,y,1/2-z
_cell_length_a              12.521
_cell_length_b              10.185
_cell_length_c              8.510
_cell_angle_alpha           90.00
_cell_angle_beta            90.00
_cell_angle_gamma           90.00
_cell_volume                1085.25
loop_

```

```
_atom_site_label
_atom_site_type_symbol
_atom_site_fract_x
_atom_site_fract_y
_atom_site_fract_z
N1 N -0.18148 0.45434 0.41263
H*2 H -0.12038 0.38761 0.40136
H*3 H -0.24458 0.41113 0.47002
H*4 H -0.15530 0.53395 0.47608
H*5 H -0.20566 0.48467 0.30306
C1+ C 0.48508 0.17942 0.12337
N2+ N 0.57637 0.10716 0.09612
N'3+ N 0.64454 0.18878 0.02113
N'4+ N 0.59477 0.30389 0.00547
N'5+ N 0.49768 0.30167 0.06632
O6+ O 0.59876 -0.01066 0.12978
N7+ N 0.39174 0.13341 0.19955
O8+ O 0.31649 0.21184 0.21441
O9+ O 0.38953 0.01863 0.24717
```

#END

```
data_1a_2
_symmetry_cell_setting      monoclinic
_symmetry_space_group_name_H-M 'P 21/c'
_symmetry_Int_Tables_number 14
loop_
_symmetry_equiv_pos_site_id
_symmetry_equiv_pos_as_xyz
1 x,y,z
2 -x,1/2+y,1/2-z
3 -x,-y,-z
4 x,1/2-y,1/2+z
_cell_length_a              8.158
_cell_length_b              10.270
_cell_length_c              8.314
_cell_angle_alpha           90.00
_cell_angle_beta            124.97
_cell_angle_gamma           90.00
_cell_volume                 570.805
loop_
_atom_site_label
_atom_site_type_symbol
_atom_site_fract_x
_atom_site_fract_y
_atom_site_fract_z
N1 N -0.31421 0.43281 0.37408
H*2 H -0.45174 0.39087 0.27744
H*3 H -0.28005 0.49343 0.29883
H*4 H -0.31774 0.48570 0.47701
H*5 H -0.20731 0.36124 0.44304
C1+ C 0.01991 0.17170 0.61430
```

N2+ N 0.19983 0.10809 0.69516  
N'3+ N 0.31392 0.18768 0.66795  
N'4+ N 0.20453 0.29333 0.57497  
N'5+ N 0.02499 0.28687 0.54005  
O6+ O 0.25889 -0.00134 0.77964  
N7+ N -0.14613 0.12437 0.60907  
O8+ O -0.29726 0.19449 0.53024  
O9+ O -0.13309 0.01667 0.68239

#END

data\_1a\_3  
\_symmetry\_cell\_setting monoclinic  
\_symmetry\_space\_group\_name\_H-M 'P 21/a'  
\_symmetry\_Int\_Tables\_number 14  
loop\_  
\_symmetry\_equiv\_pos\_site\_id  
\_symmetry\_equiv\_pos\_as\_xyz  
1 x,y,z  
2 1/2-x,1/2+y,-z  
3 -x,-y,-z  
4 1/2+x,1/2-y,z  
\_cell\_length\_a 13.823  
\_cell\_length\_b 5.049  
\_cell\_length\_c 8.203  
\_cell\_angle\_alpha 90.00  
\_cell\_angle\_beta 104.68  
\_cell\_angle\_gamma 90.00  
\_cell\_volume 553.818  
loop\_  
\_atom\_site\_label  
\_atom\_site\_type\_symbol  
\_atom\_site\_fract\_x  
\_atom\_site\_fract\_y  
\_atom\_site\_fract\_z  
N1 N -0.12534 0.43712 -0.25781  
H\*2 H -0.09645 0.26386 -0.19956  
H\*3 H -0.20176 0.43692 -0.27694  
H\*4 H -0.09549 0.59521 -0.18291  
H\*5 H -0.10766 0.45249 -0.37184  
C1+ C -0.12598 0.96907 0.23724  
N2+ N -0.03457 1.09336 0.26187  
N'3+ N -0.03404 1.28688 0.37594  
N'4+ N -0.12169 1.27537 0.41594  
N'5+ N -0.17942 1.08444 0.33395  
O6+ O 0.03784 1.04947 0.19727  
N7+ N -0.15956 0.75293 0.12745  
O8+ O -0.24434 0.66448 0.12046  
O9+ O -0.10357 0.66335 0.04462

#END

```

data_1a_4
_symmetry_cell_setting      monoclinic
_symmetry_space_group_name_H-M 'P 21/c'
_symmetry_Int_Tables_number 14
loop_
_symmetry_equiv_pos_site_id
_symmetry_equiv_pos_as_xyz
1 x,y,z
2 -x,1/2+y,1/2-z
3 -x,-y,-z
4 x,1/2-y,1/2+z
_cell_length_a              8.047
_cell_length_b              7.273
_cell_length_c              9.016
_cell_angle_alpha           90.00
_cell_angle_beta            85.87
_cell_angle_gamma           90.00
_cell_volume                526.299
loop_
_atom_site_label
_atom_site_type_symbol
_atom_site_fract_x
_atom_site_fract_y
_atom_site_fract_z
N1 N 0.73910 0.21223 0.55783
H*2 H 0.77693 0.17783 0.45008
H*3 H 0.63922 0.30036 0.55822
H*4 H 0.70481 0.09526 0.61626
H*5 H 0.83544 0.27547 0.60676
C1+ C 0.25702 0.28638 0.77118
N2+ N 0.27223 0.09764 0.77619
N'3+ N 0.38537 0.06273 0.87633
N'4+ N 0.43390 0.22483 0.92743
N'5+ N 0.35837 0.36374 0.86588
O6+ O 0.20083 -0.02692 0.70625
N7+ N 0.15148 0.38561 0.68082
O8+ O 0.15309 0.55595 0.69010
O9+ O 0.06363 0.29905 0.59784

```

#END

```

data_1a_5
_symmetry_cell_setting      monoclinic
_symmetry_space_group_name_H-M 'P 21/a'
_symmetry_Int_Tables_number 14
loop_
_symmetry_equiv_pos_site_id
_symmetry_equiv_pos_as_xyz
1 x,y,z
2 1/2-x,1/2+y,-z
3 -x,-y,-z
4 1/2+x,1/2-y,z

```

```

_cell_length_a      14.095
_cell_length_b      8.337
_cell_length_c      5.098
_cell_angle_alpha   90.00
_cell_angle_beta    58.95
_cell_angle_gamma   90.00
_cell_volume        513.23
loop_
_atom_site_label
_atom_site_type_symbol
_atom_site_fract_x
_atom_site_fract_y
_atom_site_fract_z
N1 N 0.02270 -0.23806 -0.31261
H*2 H -0.01470 -0.33797 -0.33742
H*3 H -0.03496 -0.17157 -0.12950
H*4 H 0.08471 -0.27285 -0.27519
H*5 H 0.05574 -0.16985 -0.50833
C1+ C -0.25740 -0.10354 0.75360
N2+ N -0.21504 -0.01396 0.89728
N'3+ N -0.30336 0.03496 1.16514
N'4+ N -0.39343 -0.02392 1.17647
N'5+ N -0.36854 -0.10872 0.93001
O6+ O -0.11610 0.02129 0.81397
N7+ N -0.19465 -0.17924 0.46472
O8+ O -0.24626 -0.25560 0.36860
O9+ O -0.09258 -0.16596 0.32323

```

#END

**S7.** Optimized crystal structure coordinates for 5 polymorphs of Hydroxylammonium 5-nitrotetrazolate 1*N*-oxide (ionic form).

```

data_1b_1
_symmetry_cell_setting    monoclinic
_symmetry_space_group_name_H-M  'P 21/c'
_symmetry_Int_Tables_number    14
loop_
_symmetry_equiv_pos_site_id
_symmetry_equiv_pos_as_xyz
1 x,y,z
2 -x,1/2+y,1/2-z
3 -x,-y,-z
4 x,1/2-y,1/2+z
_cell_length_a      7.781
_cell_length_b      5.374
_cell_length_c      14.195
_cell_angle_alpha   90.00
_cell_angle_beta    97.27
_cell_angle_gamma   90.00
_cell_volume        588.793
loop_

```

```

_atom_site_label
_atom_site_type_symbol
_atom_site_fract_x
_atom_site_fract_y
_atom_site_fract_z
N1 N 0.80892 0.12821 0.61944
H*2 H 0.93917 0.11551 0.61322
H*3 H 0.74551 -0.02062 0.58451
H*4 H 0.79319 0.12672 0.69061
O5 O 0.75690 0.35599 0.57617
H*6 H 0.63337 0.37539 0.58056
C1+ C 0.64625 -0.47768 0.37200
N2+ N 0.81127 -0.40829 0.35705
N'3+ N 0.84897 -0.20280 0.41059
N'4+ N 0.71126 -0.15481 0.45488
N'5+ N 0.58562 -0.31823 0.43304
O6+ O 0.91486 -0.50474 0.30561
N7+ N 0.55314 -0.68451 0.33006
O8+ O 0.40520 -0.72033 0.35138
O9+ O 0.62264 -0.81828 0.27481

```

#END

```

data_1b_2
_symmetry_cell_setting      monoclinic
_symmetry_space_group_name_H-M 'P 21/a'
_symmetry_Int_Tables_number 14
loop_
_symmetry_equiv_pos_site_id
_symmetry_equiv_pos_as_xyz
1 x,y,z
2 1/2-x,1/2+y,-z
3 -x,-y,-z
4 1/2+x,1/2-y,z
_cell_length_a              13.281
_cell_length_b              6.118
_cell_length_c              7.302
_cell_angle_alpha           90.00
_cell_angle_beta            110.55
_cell_angle_gamma           90.00
_cell_volume                 555.556
loop_
_atom_site_label
_atom_site_type_symbol
_atom_site_fract_x
_atom_site_fract_y
_atom_site_fract_z
N1 N -0.17197 0.94876 0.70815
H*2 H -0.23665 0.97943 0.75129
H*3 H -0.11855 1.07755 0.75176
H*4 H -0.13601 0.80438 0.77147
O5 O -0.21668 0.93220 0.50331

```

H\*6 H -0.15767 0.90297 0.45620  
C1+ C -0.08226 0.45990 0.21629  
N2+ N 0.01669 0.54769 0.23634  
N'3+ N 0.02023 0.74501 0.32165  
N'4+ N -0.07299 0.77072 0.34999  
N'5+ N -0.13722 0.60050 0.28764  
O6+ O 0.09290 0.47195 0.18934  
N7+ N -0.12123 0.25363 0.13360  
O8+ O -0.21259 0.19958 0.12685  
O9+ O -0.06316 0.13826 0.07267

#END

data\_1b\_3  
\_symmetry\_cell\_setting monoclinic  
\_symmetry\_space\_group\_name\_H-M 'P 21/a'  
\_symmetry\_Int\_Tables\_number 14  
loop\_  
\_symmetry\_equiv\_pos\_site\_id  
\_symmetry\_equiv\_pos\_as\_xyz  
1 x,y,z  
2 1/2-x,1/2+y,-z  
3 -x,-y,-z  
4 1/2+x,1/2-y,z  
\_cell\_length\_a 8.038  
\_cell\_length\_b 9.715  
\_cell\_length\_c 7.105  
\_cell\_angle\_alpha 90.00  
\_cell\_angle\_beta 87.41  
\_cell\_angle\_gamma 90.00  
\_cell\_volume 554.257  
loop\_  
\_atom\_site\_label  
\_atom\_site\_type\_symbol  
\_atom\_site\_fract\_x  
\_atom\_site\_fract\_y  
\_atom\_site\_fract\_z  
N1 N 0.35199 0.15433 0.18094  
H\*2 H 0.44626 0.13696 0.27165  
H\*3 H 0.24767 0.18790 0.25789  
H\*4 H 0.39120 0.22744 0.08311  
O5 O 0.32535 0.02583 0.09642  
H\*6 H 0.23631 0.03784 0.00879  
C1+ C 0.36073 0.58317 0.30532  
N2+ N 0.44890 0.66335 0.42622  
N'3+ N 0.55344 0.74053 0.31556  
N'4+ N 0.52700 0.70649 0.13745  
N'5+ N 0.41064 0.61112 0.12604  
O6+ O 0.44193 0.67023 0.60422  
N7+ N 0.23635 0.48589 0.35937  
O8+ O 0.16905 0.42220 0.23175  
O9+ O 0.20094 0.46906 0.52915

#END

```
data_1b_4
_symmetry_cell_setting      orthorhombic
_symmetry_space_group_name_H-M 'P 21 21 21'
_symmetry_Int_Tables_number 19
loop_
_symmetry_equiv_pos_site_id
_symmetry_equiv_pos_as_xyz
1 x,y,z
2 1/2+x,1/2-y,-z
3 -x,1/2+y,1/2-z
4 1/2-x,-y,1/2+z
_cell_length_a             8.091
_cell_length_b             8.013
_cell_length_c             8.978
_cell_angle_alpha          90.00
_cell_angle_beta           90.00
_cell_angle_gamma          90.00
_cell_volume               582.072
loop_
_atom_site_label
_atom_site_type_symbol
_atom_site_fract_x
_atom_site_fract_y
_atom_site_fract_z
N1 N 0.19409 0.16042 -0.26696
H*2 H 0.07527 0.20673 -0.26872
H*3 H 0.18997 0.03538 -0.23925
H*4 H 0.24647 0.17692 -0.37084
O5 O 0.27530 0.25524 -0.15740
H*6 H 0.38911 0.21506 -0.15214
C1+ C 0.65441 0.08797 -0.11750
N2+ N 0.82177 0.07774 -0.14507
N'3+ N 0.86558 0.22683 -0.20337
N'4+ N 0.72902 0.31994 -0.20940
N'5+ N 0.59834 0.23941 -0.15808
O6+ O 0.92274 -0.04049 -0.12400
N7+ N 0.55505 -0.04016 -0.05597
O8+ O 0.40579 -0.00992 -0.03849
O9+ O 0.62076 -0.17463 -0.02289
```

#END

```
data_1b_5
_symmetry_cell_setting      orthorhombic
_symmetry_space_group_name_H-M 'P b c a'
_symmetry_Int_Tables_number 61
loop_
_symmetry_equiv_pos_site_id
_symmetry_equiv_pos_as_xyz
```

```

1 x,y,z
2 1/2-x,1/2+y,z
3 x,1/2-y,1/2+z
4 1/2-x,-y,1/2+z
5 -x,-y,-z
6 1/2+x,1/2-y,-z
7 -x,1/2+y,1/2-z
8 1/2+x,y,1/2-z
_cell_length_a      12.777
_cell_length_b      10.669
_cell_length_c       8.423
_cell_angle_alpha   90.00
_cell_angle_beta    90.00
_cell_angle_gamma   90.00
_cell_volume        1148.2
loop_
_atom_site_label
_atom_site_type_symbol
_atom_site_fract_x
_atom_site_fract_y
_atom_site_fract_z
N1 N -0.20675 0.41708 -0.64664
H*2 H -0.27551 0.37137 -0.61943
H*3 H -0.14577 0.35366 -0.64105
H*4 H -0.21296 0.45477 -0.75921
O5 O -0.19756 0.51075 -0.53007
H*6 H -0.13295 0.55659 -0.55168
C1+ C 0.47614 0.17090 0.12205
N2+ N 0.56873 0.11544 0.07567
N'3+ N 0.62018 0.20263 -0.01073
N'4+ N 0.55983 0.30466 -0.01435
N'5+ N 0.47167 0.28865 0.06517
O6+ O 0.60449 0.00691 0.10252
N7+ N 0.39712 0.11389 0.21525
O8+ O 0.31833 0.17749 0.24628
O9+ O 0.41008 0.00471 0.26087

```

#END

**S8.** Optimized crystal structure coordinates for 5 polymorphs of Hydrazinium 5-nitrotetrazolate 1N-oxide (ionic form).

```

data_1c_1
_symmetry_cell_setting      monoclinic
_symmetry_space_group_name_H-M 'P 21/c'
_symmetry_Int_Tables_number 14
loop_
_symmetry_equiv_pos_site_id
_symmetry_equiv_pos_as_xyz
1 x,y,z
2 -x,1/2+y,1/2-z
3 -x,-y,-z

```

```

4 x,1/2-y,1/2+z
_cell_length_a      10.623
_cell_length_b      8.965
_cell_length_c      8.445
_cell_angle_alpha   90.00
_cell_angle_beta    46.11
_cell_angle_gamma   90.00
_cell_volume        579.609
loop_
_atom_site_label
_atom_site_type_symbol
_atom_site_fract_x
_atom_site_fract_y
_atom_site_fract_z
N1 N 0.72180 0.53916 0.15970
H*2 H 0.60583 0.55625 0.20204
H*3 H 0.73113 0.42629 0.17174
N4 N 0.71136 0.61369 0.32064
H*5 H 0.82617 0.59479 0.27884
H*6 H 0.70015 0.72549 0.30931
H*7 H 0.82343 0.57136 -0.00174
C1+ C 0.20602 0.66014 0.28998
N2+ N 0.24540 0.51004 0.25453
N'3+ N 0.37545 0.49182 0.24762
N'4+ N 0.41018 0.62606 0.27787
N'5+ N 0.30960 0.73097 0.30417
O6+ O 0.18075 0.40393 0.23140
N7+ N 0.07676 0.73062 0.30893
O8+ O 0.05829 0.86742 0.34087
O9+ O -0.01070 0.65358 0.29298

```

#END

```

data_1c_2
_symmetry_cell_setting      monoclinic
_symmetry_space_group_name_H-M 'P 21'
_symmetry_Int_Tables_number 4
loop_
_symmetry_equiv_pos_site_id
_symmetry_equiv_pos_as_xyz
1 x,y,z
2 -x,1/2+y,-z
_cell_length_a      7.589
_cell_length_b      7.343
_cell_length_c      5.525
_cell_angle_alpha   90.00
_cell_angle_beta    80.66
_cell_angle_gamma   90.00
_cell_volume        303.805
loop_
_atom_site_label
_atom_site_type_symbol

```

```

_atom_site_fract_x
_atom_site_fract_y
_atom_site_fract_z
N1 N 0.71115 0.60292 -0.43047
H*2 H 0.58738 0.64186 -0.34092
H*3 H 0.80286 0.68554 -0.36631
N4 N 0.71878 0.63934 -0.68957
H*5 H 0.84270 0.60223 -0.77676
H*6 H 0.62599 0.55831 -0.75122
H*7 H 0.73414 0.46980 -0.38393
C1+ C -0.25985 0.07499 0.17708
N2+ N -0.08133 0.07333 0.19850
N'3+ N -0.06733 0.17439 0.39897
N'4+ N -0.23126 0.23242 0.49031
N'5+ N -0.35157 0.17453 0.35994
O6+ O 0.05052 -0.00261 0.06755
N7+ N -0.33690 -0.01377 -0.00794
O8+ O -0.50066 0.00182 0.00006
O9+ O -0.23869 -0.10166 -0.16702

```

#END

```

data_1c_3
_symmetry_cell_setting      monoclinic
_symmetry_space_group_name_H-M 'P 21/a'
_symmetry_Int_Tables_number 14
loop_
_symmetry_equiv_pos_site_id
_symmetry_equiv_pos_as_xyz
1 x,y,z
2 1/2-x,1/2+y,-z
3 -x,-y,-z
4 1/2+x,1/2-y,z
_cell_length_a              13.219
_cell_length_b              6.563
_cell_length_c              7.074
_cell_angle_alpha           90.00
_cell_angle_beta            111.42
_cell_angle_gamma           90.00
_cell_volume                 571.324
loop_
_atom_site_label
_atom_site_type_symbol
_atom_site_fract_x
_atom_site_fract_y
_atom_site_fract_z
N1 N -0.32704 0.46933 0.29644
H*2 H -0.37304 0.35238 0.21057
H*3 H -0.26125 0.48634 0.25303
N4 N -0.28740 0.40699 0.50735
H*5 H -0.24084 0.52295 0.59130
H*6 H -0.35326 0.38823 0.54860

```

H\*7 H -0.37246 0.60162 0.26223  
C1+ C -0.07621 0.44121 0.21933  
N2+ N 0.02401 0.51546 0.23418  
N'3+ N 0.02888 0.70821 0.30428  
N'4+ N -0.06482 0.74439 0.32913  
N'5+ N -0.13061 0.58534 0.27892  
O6+ O 0.10023 0.43231 0.19427  
N7+ N -0.11682 0.24388 0.15197  
O8+ O -0.20917 0.20176 0.14793  
O9+ O -0.05912 0.12407 0.10090

#END

data\_1c\_4  
\_symmetry\_cell\_setting monoclinic  
\_symmetry\_space\_group\_name\_H-M 'P 21/a'  
\_symmetry\_Int\_Tables\_number 14  
loop\_  
\_symmetry\_equiv\_pos\_site\_id  
\_symmetry\_equiv\_pos\_as\_xyz  
1 x,y,z  
2 1/2-x,1/2+y,-z  
3 -x,-y,-z  
4 1/2+x,1/2-y,z  
\_cell\_length\_a 7.228  
\_cell\_length\_b 14.074  
\_cell\_length\_c 6.020  
\_cell\_angle\_alpha 90.00  
\_cell\_angle\_beta 90.92  
\_cell\_angle\_gamma 90.00  
\_cell\_volume 612.317  
loop\_  
\_atom\_site\_label  
\_atom\_site\_type\_symbol  
\_atom\_site\_fract\_x  
\_atom\_site\_fract\_y  
\_atom\_site\_fract\_z  
N1 N 0.73667 -0.91676 -0.26283  
H\*2 H 0.63432 -0.88623 -0.16989  
H\*3 H 0.69472 -0.98515 -0.29674  
N4 N 0.90357 -0.92130 -0.12692  
H\*5 H 1.00388 -0.95265 -0.21950  
H\*6 H 0.94313 -0.85316 -0.09194  
H\*7 H 0.74672 -0.88008 -0.41074  
C1+ C 0.18114 0.66298 0.66559  
N2+ N 0.14021 0.75254 0.74372  
N'3+ N 0.04704 0.73917 0.93409  
N'4+ N 0.03439 0.64554 0.96521  
N'5+ N 0.11444 0.59708 0.80511  
O6+ O 0.17639 0.83375 0.66541  
N7+ N 0.27835 0.64237 0.46896  
O8+ O 0.30338 0.55737 0.42290

O9+ O 0.33315 0.70917 0.35359

#END

data\_1c\_5

\_symmetry\_cell\_setting monoclinic

\_symmetry\_space\_group\_name\_H-M 'C 2/c'

\_symmetry\_Int\_Tables\_number 15

loop\_

\_symmetry\_equiv\_pos\_site\_id

\_symmetry\_equiv\_pos\_as\_xyz

1 x,y,z

2 -x,y,1/2-z

3 -x,-y,-z

4 x,-y,1/2+z

5 1/2+x,1/2+y,z

6 1/2-x,1/2+y,1/2-z

7 1/2-x,1/2-y,-z

8 1/2+x,1/2-y,1/2+z

\_cell\_length\_a 22.845

\_cell\_length\_b 5.548

\_cell\_length\_c 14.747

\_cell\_angle\_alpha 90.00

\_cell\_angle\_beta 139.55

\_cell\_angle\_gamma 90.00

\_cell\_volume 1212.64

loop\_

\_atom\_site\_label

\_atom\_site\_type\_symbol

\_atom\_site\_fract\_x

\_atom\_site\_fract\_y

\_atom\_site\_fract\_z

N1 N 0.38149 0.06041 0.72057

H\*2 H 0.43594 -0.02865 0.81211

H\*3 H 0.37804 0.01033 0.64943

N4 N 0.39965 0.31668 0.74570

H\*5 H 0.34575 0.40362 0.65396

H\*6 H 0.40398 0.36442 0.81757

H\*7 H 0.32362 0.00298 0.68483

C1+ C 0.63416 -0.44767 0.06009

N2+ N 0.65052 -0.34949 -0.00495

N'3+ N 0.59706 -0.15277 -0.07393

N'4+ N 0.55146 -0.13738 -0.04988

N'5+ N 0.57236 -0.31378 0.03121

O6+ O 0.70302 -0.41653 -0.00583

N7+ N 0.67551 -0.65717 0.14464

O8+ O 0.65289 -0.72095 0.19542

O9+ O 0.73157 -0.76562 0.16377

#END

**S9.** Optimized crystal structure coordinates for 5 polymorphs of Guanidinium 5-nitrotetrazolate 1*N*-oxide (ionic form).

```
data_1d_1
_symmetry_cell_setting      monoclinic
_symmetry_space_group_name_H-M 'P 21/c'
_symmetry_Int_Tables_number 14
loop_
_symmetry_equiv_pos_site_id
_symmetry_equiv_pos_as_xyz
1 x,y,z
2 -x,1/2+y,1/2-z
3 -x,-y,-z
4 x,1/2-y,1/2+z
_cell_length_a              6.065
_cell_length_b              7.519
_cell_length_c              15.109
_cell_angle_alpha           90.00
_cell_angle_beta            90.19
_cell_angle_gamma           90.00
_cell_volume                 689.008
loop_
_atom_site_label
_atom_site_type_symbol
_atom_site_fract_x
_atom_site_fract_y
_atom_site_fract_z
C1 C 0.25006 0.17437 -0.22862
N2 N 0.24994 0.18343 -0.14022
H*3 H 0.24990 0.07228 -0.10262
H*4 H 0.24990 0.30169 -0.10844
N5 N 0.25012 0.01601 -0.26891
H*6 H 0.25021 0.00615 -0.33562
H*7 H 0.25008 -0.09842 -0.23383
N8 N 0.25012 0.32367 -0.27672
H*9 H 0.25008 0.44467 -0.24762
H*10 H 0.25021 0.31984 -0.34358
C1+ C 0.24997 0.77134 -0.01429
N2+ N 0.24998 0.58794 -0.01424
N'3+ N 0.25002 0.53851 -0.10025
N'4+ N 0.25003 0.68737 -0.14833
N'5+ N 0.25001 0.83140 -0.09820
O6+ O 0.24995 0.47835 0.04929
N7+ N 0.24994 0.88147 0.06174
O8+ O 0.24994 1.04485 0.04974
O9+ O 0.24991 0.81069 0.13570

#END
```

```
data_1d_2
_symmetry_cell_setting      triclinic
_symmetry_space_group_name_H-M 'P -1'
```

```

_symmetry_Int_Tables_number 2
loop_
_symmetry_equiv_pos_site_id
_symmetry_equiv_pos_as_xyz
1 x,y,z
2 -x,-y,-z
_cell_length_a 6.226
_cell_length_b 7.541
_cell_length_c 7.604
_cell_angle_alpha 82.24
_cell_angle_beta 79.69
_cell_angle_gamma 79.70
_cell_volume 343.622
loop_
_atom_site_label
_atom_site_type_symbol
_atom_site_fract_x
_atom_site_fract_y
_atom_site_fract_z
C1 C -0.24336 0.29182 0.47724
N2 N -0.24044 0.42883 0.57116
H*3 H -0.23535 0.40801 0.70454
H*4 H -0.24322 0.55719 0.51148
N5 N -0.23955 0.12329 0.55974
H*6 H -0.24165 0.01782 0.49133
H*7 H -0.23445 0.09648 0.69291
N8 N -0.25010 0.32334 0.30082
H*9 H -0.25307 0.44963 0.23585
H*10 H -0.25241 0.22179 0.22734
C1+ C 0.25063 0.23307 -0.05442
N2+ N 0.25332 0.04952 -0.05231
N'3+ N 0.24199 0.02274 -0.22240
N'4+ N 0.23307 0.18438 -0.31940
N'5+ N 0.23799 0.31529 -0.22153
O6+ O 0.26383 -0.07689 0.07494
N7+ N 0.25968 0.32322 0.09521
O8+ O 0.25561 0.48987 0.06959
O9+ O 0.27108 0.23289 0.24269

```

#END

```

data_1d_3
_symmetry_cell_setting monoclinic
_symmetry_space_group_name_H-M 'C 2/c'
_symmetry_Int_Tables_number 15
loop_
_symmetry_equiv_pos_site_id
_symmetry_equiv_pos_as_xyz
1 x,y,z
2 -x,y,1/2-z
3 -x,-y,-z
4 x,-y,1/2+z

```

5 1/2+x,1/2+y,z  
 6 1/2-x,1/2+y,1/2-z  
 7 1/2-x,1/2-y,-z  
 8 1/2+x,1/2-y,1/2+z  
 \_cell\_length\_a 13.281  
 \_cell\_length\_b 7.548  
 \_cell\_length\_c 15.032  
 \_cell\_angle\_alpha 90.00  
 \_cell\_angle\_beta 113.83  
 \_cell\_angle\_gamma 90.00  
 \_cell\_volume 1378.42  
 loop\_  
 \_atom\_site\_label  
 \_atom\_site\_type\_symbol  
 \_atom\_site\_fract\_x  
 \_atom\_site\_fract\_y  
 \_atom\_site\_fract\_z  
 C1 C 0.62691 0.57364 0.23013  
 N2 N 0.62891 0.56534 0.31969  
 H\*3 H 0.62802 0.44782 0.35158  
 H\*4 H 0.63137 0.67635 0.35811  
 N5 N 0.62367 0.42455 0.18097  
 H\*6 H 0.62211 0.42781 0.11322  
 H\*7 H 0.62267 0.30427 0.21014  
 N8 N 0.62816 0.73103 0.18972  
 H\*9 H 0.63060 0.84528 0.22559  
 H\*10 H 0.62669 0.74030 0.12215  
 C1+ C 0.12580 0.52252 -0.05701  
 N2+ N 0.12325 0.33985 -0.05806  
 N'3+ N 0.12845 0.29076 -0.14257  
 N'4+ N 0.13381 0.43910 -0.18875  
 N'5+ N 0.13238 0.58247 -0.13881  
 O6+ O 0.11737 0.23060 0.00350  
 N7+ N 0.12212 0.63210 0.01809  
 O8+ O 0.12521 0.79483 0.00731  
 O9+ O 0.11607 0.56148 0.09008

#END

data\_1d\_4  
 \_symmetry\_cell\_setting triclinic  
 \_symmetry\_space\_group\_name\_H-M 'P -1'  
 \_symmetry\_Int\_Tables\_number 2  
 loop\_  
 \_symmetry\_equiv\_pos\_site\_id  
 \_symmetry\_equiv\_pos\_as\_xyz  
 1 x,y,z  
 2 -x,-y,-z  
 \_cell\_length\_a 7.560  
 \_cell\_length\_b 7.587  
 \_cell\_length\_c 7.576  
 \_cell\_angle\_alpha 66.03

```

_cell_angle_beta          60.62
_cell_angle_gamma        82.33
_cell_volume              344.813
loop_
_atom_site_label
_atom_site_type_symbol
_atom_site_fract_x
_atom_site_fract_y
_atom_site_fract_z
C1 C -0.37364 0.45970 -0.75323
N2 N -0.40085 0.63922 -0.75840
H*3 H -0.52552 0.70573 -0.75973
H*4 H -0.29754 0.71360 -0.76112
N5 N -0.51291 0.36466 -0.74971
H*6 H -0.49534 0.22894 -0.74579
H*7 H -0.63977 0.42580 -0.75088
N8 N -0.20716 0.37522 -0.75158
H*9 H -0.10005 0.44443 -0.75417
H*10 H -0.18361 0.23970 -0.74769
C1+ C -0.15319 0.11895 0.75140
N2+ N 0.03135 0.11841 0.74715
N'3+ N 0.05494 0.28701 0.75721
N'4+ N -0.10944 0.38167 0.76690
N'5+ N -0.23911 0.28369 0.76371
O6+ O 0.16093 -0.00649 0.73635
N7+ N -0.24088 -0.02992 0.74404
O8+ O -0.40890 -0.00598 0.74938
O9+ O -0.14718 -0.17516 0.73278

```

#END

```

data_1d_5
_symmetry_cell_setting    monoclinic
_symmetry_space_group_name_H-M 'C c'
_symmetry_Int_Tables_number 9
loop_
_symmetry_equiv_pos_site_id
_symmetry_equiv_pos_as_xyz
1 x,y,z
2 x,-y,1/2+z
3 1/2+x,1/2+y,z
4 1/2+x,1/2-y,1/2+z
_cell_length_a            11.386
_cell_length_b            9.983
_cell_length_c            6.625
_cell_angle_alpha         90.00
_cell_angle_beta          67.17
_cell_angle_gamma         90.00
_cell_volume              694.047
loop_
_atom_site_label
_atom_site_type_symbol

```

```

_atom_site_fract_x
_atom_site_fract_y
_atom_site_fract_z
C1 C 0.16537 0.58513 0.44751
N2 N 0.08977 0.48218 0.44953
H*3 H -0.00013 0.49705 0.45958
H*4 H 0.12032 0.38651 0.44107
N5 N 0.12240 0.71073 0.45891
H*6 H 0.17794 0.78995 0.45762
H*7 H 0.03314 0.73007 0.46914
N8 N 0.28394 0.56248 0.43409
H*9 H 0.31831 0.46838 0.42533
H*10 H 0.34264 0.63880 0.43232
C1+ C 0.18965 0.13851 0.44662
N2+ N 0.27793 0.04751 0.45831
N'3+ N 0.37910 0.12062 0.45254
N'4+ N 0.35066 0.24899 0.43808
N'5+ N 0.23620 0.26351 0.43410
O6+ O 0.27355 -0.07894 0.47187
N7+ N 0.06822 0.10682 0.44749
O8+ O 0.00034 0.20145 0.43584
O9+ O 0.03578 -0.01221 0.45966

```

#END

**S10.** Optimized crystal structure coordinates for 5 polymorphs of Aminoguanidinium 5-nitrotetrazolate 1*N*-oxide (ionic form).

```

data_1e_1
_symmetry_cell_setting      monoclinic
_symmetry_space_group_name_H-M 'C c'
_symmetry_Int_Tables_number 9
loop_
_symmetry_equiv_pos_site_id
_symmetry_equiv_pos_as_xyz
1 x,y,z
2 x,-y,1/2+z
3 1/2+x,1/2+y,z
4 1/2+x,1/2-y,1/2+z
_cell_length_a              4.008
_cell_length_b              15.380
_cell_length_c              12.917
_cell_angle_alpha           90.00
_cell_angle_beta            90.45
_cell_angle_gamma           90.00
_cell_volume                 796.219
loop_
_atom_site_label
_atom_site_type_symbol
_atom_site_fract_x
_atom_site_fract_y
_atom_site_fract_z

```

C1 C 0.10075 -0.19812 -0.10654  
 N2 N 0.21170 -0.11993 -0.07613  
 H\*3 H 0.37608 -0.11365 -0.01689  
 H\*4 H 0.13377 -0.06500 -0.11170  
 N5 N 0.21079 -0.26978 -0.05707  
 H\*6 H 0.37591 -0.26392 0.00248  
 N7 N -0.11558 -0.20632 -0.18450  
 H\*8 H -0.20373 -0.15412 -0.22345  
 H\*9 H -0.19148 -0.26701 -0.20437  
 N10 N 0.09401 -0.35127 -0.08919  
 H\*11 H 0.28746 -0.38887 -0.11346  
 H\*12 H -0.02870 -0.38122 -0.03035  
 C1+ C 0.19536 0.43467 0.14724  
 N2+ N 0.28995 0.49456 0.22131  
 N'3+ N 0.15634 0.57119 0.19087  
 N'4+ N -0.00928 0.55635 0.10261  
 N'5+ N 0.00923 0.47405 0.07383  
 O6+ O 0.46394 0.48569 0.30277  
 N7+ N 0.27924 0.34522 0.14732  
 O8+ O 0.17286 0.30028 0.07433  
 O9+ O 0.45250 0.31635 0.21922

#END

data\_1e\_2  
 \_symmetry\_cell\_setting monoclinic  
 \_symmetry\_space\_group\_name\_H-M 'P 21/a'  
 \_symmetry\_Int\_Tables\_number 14  
 loop\_  
 \_symmetry\_equiv\_pos\_site\_id  
 \_symmetry\_equiv\_pos\_as\_xyz  
 1 x,y,z  
 2 1/2-x,1/2+y,-z  
 3 -x,-y,-z  
 4 1/2+x,1/2-y,z  
 \_cell\_length\_a 17.892  
 \_cell\_length\_b 12.917  
 \_cell\_length\_c 3.916  
 \_cell\_angle\_alpha 90.00  
 \_cell\_angle\_beta 119.68  
 \_cell\_angle\_gamma 90.00  
 \_cell\_volume 786.295  
 loop\_  
 \_atom\_site\_label  
 \_atom\_site\_type\_symbol  
 \_atom\_site\_fract\_x  
 \_atom\_site\_fract\_y  
 \_atom\_site\_fract\_z  
 C1 C 0.76411 0.54148 0.85667  
 N2 N 0.74231 0.63574 0.69383  
 H\*3 H 0.68021 0.65861 0.54292  
 H\*4 H 0.78750 0.68665 0.71758

N5 N 0.70191 0.47590 0.81824  
 H\*6 H 0.63940 0.49839 0.66703  
 N7 N 0.84586 0.51146 1.05520  
 H\*8 H 0.89428 0.55844 1.09029  
 H\*9 H 0.85882 0.43929 1.17255  
 N10 N 0.72508 0.37754 0.98898  
 H\*11 H 0.70596 0.36827 1.19261  
 H\*12 H 0.69837 0.32177 0.77837  
 C1+ C -0.02540 0.20909 0.92184  
 N2+ N 0.04615 0.27077 1.03941  
 N'3+ N 0.01971 0.35246 0.79118  
 N'4+ N -0.06390 0.33872 0.53945  
 N'5+ N -0.09342 0.25234 0.61036  
 O6+ O 0.12266 0.25960 1.31632  
 N7+ N -0.02793 0.11451 1.09875  
 O8+ O -0.09802 0.06861 0.95509  
 O9+ O 0.03898 0.08240 1.38471

#END

data\_1e\_3  
 \_symmetry\_cell\_setting monoclinic  
 \_symmetry\_space\_group\_name\_H-M 'C c'  
 \_symmetry\_Int\_Tables\_number 9  
 loop\_  
 \_symmetry\_equiv\_pos\_site\_id  
 \_symmetry\_equiv\_pos\_as\_xyz  
 1 x,y,z  
 2 x,-y,1/2+z  
 3 1/2+x,1/2+y,z  
 4 1/2+x,1/2-y,1/2+z  
 \_cell\_length\_a 4.179  
 \_cell\_length\_b 23.731  
 \_cell\_length\_c 10.362  
 \_cell\_angle\_alpha 90.00  
 \_cell\_angle\_beta 131.27  
 \_cell\_angle\_gamma 90.00  
 \_cell\_volume 772.368  
 loop\_  
 \_atom\_site\_label  
 \_atom\_site\_type\_symbol  
 \_atom\_site\_fract\_x  
 \_atom\_site\_fract\_y  
 \_atom\_site\_fract\_z  
 C1 C 0.37155 -0.11092 -0.16591  
 N2 N 0.34436 -0.07582 -0.27410  
 H\*3 H 0.35077 -0.09033 -0.36405  
 H\*4 H 0.31664 -0.03379 -0.26865  
 N5 N 0.40817 -0.16668 -0.17741  
 H\*6 H 0.41480 -0.18153 -0.26747  
 N7 N 0.36308 -0.09178 -0.04758  
 H\*8 H 0.33597 -0.05027 -0.03503

H\*9 H 0.38475 -0.12016 0.03106  
 N10 N 0.43644 -0.20313 -0.06405  
 H\*11 H 0.18781 -0.23069 -0.13046  
 H\*12 H 0.71777 -0.22446 0.00877  
 C1+ C -0.14753 0.61617 -0.10038  
 N2+ N -0.12345 0.65639 -0.18975  
 N'3+ N -0.08748 0.70644 -0.11885  
 N'4+ N -0.09056 0.69568 0.00672  
 N'5+ N -0.12667 0.64123 0.02151  
 O6+ O -0.13083 0.65149 -0.31328  
 N7+ N -0.18806 0.55735 -0.13070  
 O8+ O -0.20541 0.52697 -0.03788  
 O9+ O -0.20411 0.53918 -0.24683

#END

data\_1e\_4  
 \_symmetry\_cell\_setting monoclinic  
 \_symmetry\_space\_group\_name\_H-M 'P 21/c'  
 \_symmetry\_Int\_Tables\_number 14  
 loop\_  
 \_symmetry\_equiv\_pos\_site\_id  
 \_symmetry\_equiv\_pos\_as\_xyz  
 1 x,y,z  
 2 -x,1/2+y,1/2-z  
 3 -x,-y,-z  
 4 x,1/2-y,1/2+z  
 \_cell\_length\_a 4.050  
 \_cell\_length\_b 11.568  
 \_cell\_length\_c 21.277  
 \_cell\_angle\_alpha 90.00  
 \_cell\_angle\_beta 128.27  
 \_cell\_angle\_gamma 90.00  
 \_cell\_volume 782.617  
 loop\_  
 \_atom\_site\_label  
 \_atom\_site\_type\_symbol  
 \_atom\_site\_fract\_x  
 \_atom\_site\_fract\_y  
 \_atom\_site\_fract\_z  
 C1 C 0.88871 0.21257 0.34858  
 N2 N 0.88465 0.15940 0.29216  
 H\*3 H 0.87406 0.20474 0.25035  
 H\*4 H 0.89210 0.07230 0.28989  
 N5 N 0.87845 0.32887 0.34953  
 H\*6 H 0.86779 0.37492 0.30771  
 N7 N 0.90266 0.15283 0.40357  
 H\*8 H 0.91066 0.06557 0.40480  
 H\*9 H 0.90513 0.19737 0.44492  
 N10 N 0.88275 0.38393 0.40861  
 H\*11 H 1.14164 0.43528 0.44304  
 H\*12 H 0.61636 0.43166 0.38298

C1+ C 0.85795 0.24886 0.13181  
N2+ N 0.91880 0.32615 0.09048  
N'3+ N 1.01624 0.42808 0.12940  
N'4+ N 1.01209 0.41063 0.19090  
N'5+ N 0.91704 0.30264 0.19417  
O6+ O 0.89534 0.31246 0.02882  
N7+ N 0.74975 0.13075 0.11236  
O8+ O 0.70681 0.07318 0.15614  
O9+ O 0.70359 0.09087 0.05338

#END

data\_1e\_5  
\_symmetry\_cell\_setting monoclinic  
\_symmetry\_space\_group\_name\_H-M 'P 21/c'  
\_symmetry\_Int\_Tables\_number 14  
loop\_  
\_symmetry\_equiv\_pos\_site\_id  
\_symmetry\_equiv\_pos\_as\_xyz  
1 x,y,z  
2 -x,1/2+y,1/2-z  
3 -x,-y,-z  
4 x,1/2-y,1/2+z  
\_cell\_length\_a 4.198  
\_cell\_length\_b 23.686  
\_cell\_length\_c 10.393  
\_cell\_angle\_alpha 90.00  
\_cell\_angle\_beta 48.50  
\_cell\_angle\_gamma 90.00  
\_cell\_volume 773.983  
loop\_  
\_atom\_site\_label  
\_atom\_site\_type\_symbol  
\_atom\_site\_fract\_x  
\_atom\_site\_fract\_y  
\_atom\_site\_fract\_z  
C1 C 0.76045 0.63819 0.18067  
N2 N 0.78924 0.67286 0.07149  
H\*3 H 0.78674 0.65786 -0.01885  
H\*4 H 0.81428 0.71506 0.07655  
N5 N 0.72753 0.58218 0.16967  
H\*6 H 0.72484 0.56684 0.07922  
N7 N 0.76376 0.65797 0.29951  
H\*8 H 0.78799 0.69968 0.31173  
H\*9 H 0.74110 0.62988 0.37891  
N10 N 0.69756 0.54617 0.28407  
H\*11 H 0.41770 0.52452 0.35663  
H\*12 H 0.94741 0.51879 0.21844  
C1+ C 0.79117 -0.13395 0.24329  
N2+ N 0.78041 -0.09440 0.14884  
N'3+ N 0.76234 -0.04356 0.21250  
N'4+ N 0.76261 -0.05323 0.33891

N'5+ N 0.77990 -0.10772 0.36111  
O6+ O 0.78517 -0.10043 0.02662  
N7+ N 0.81104 -0.19323 0.22121  
O8+ O 0.81852 -0.22287 0.31773  
O9+ O 0.81992 -0.21250 0.10817

#END

**S11.** Optimized crystal structure coordinates for 5 polymorphs of Diaminoguanidinium 5-nitrotetrazolate 1*N*-oxide (ionic form).

```
data_1f_1
_symmetry_cell_setting      triclinic
_symmetry_space_group_name_H-M 'P -1'
_symmetry_Int_Tables_number 2
loop_
_symmetry_equiv_pos_site_id
_symmetry_equiv_pos_as_xyz
1 x,y,z
2 -x,-y,-z
_cell_length_a              6.911
_cell_length_b              12.572
_cell_length_c              13.119
_cell_angle_alpha           141.77
_cell_angle_beta            114.09
_cell_angle_gamma           42.63
_cell_volume                 436.759
loop_
_atom_site_label
_atom_site_type_symbol
_atom_site_fract_x
_atom_site_fract_y
_atom_site_fract_z
C1 C -0.04567 0.29695 0.26641
N2 N 0.25022 0.13537 0.24039
H*3 H 0.40165 0.11127 0.20978
N4 N -0.12917 0.41913 0.25116
H*5 H -0.35280 0.54190 0.27063
N6 N -0.25444 0.33609 0.30687
H*7 H -0.18121 0.24008 0.31696
H*8 H -0.47892 0.45680 0.32716
N9 N 0.09628 0.37344 0.20848
N10 N 0.33566 0.00889 0.25643
H*11 H 0.41445 0.05388 0.35616
H*12 H 0.12479 0.30023 0.09004
H*13 H 0.03299 0.53648 0.30908
H*14 H 0.50604 -0.18182 0.13764
C1+ C -0.15050 0.14733 0.70589
N2+ N 0.05710 0.09393 0.77909
N'3+ N -0.02663 0.31045 0.93431
N'4+ N -0.27312 0.48274 0.95055
N'5+ N -0.35468 0.39001 0.81406
```

O6+ O 0.28426 -0.10847 0.72280  
N7+ N -0.15165 -0.02479 0.54214  
O8+ O -0.35599 0.05490 0.49578  
O9+ O 0.04852 -0.24388 0.45393

#END

data\_1f\_2  
\_symmetry\_cell\_setting triclinic  
\_symmetry\_space\_group\_name\_H-M 'P -1'  
\_symmetry\_Int\_Tables\_number 2  
loop\_  
\_symmetry\_equiv\_pos\_site\_id  
\_symmetry\_equiv\_pos\_as\_xyz  
1 x,y,z  
2 -x,-y,-z  
\_cell\_length\_a 8.366  
\_cell\_length\_b 8.871  
\_cell\_length\_c 6.650  
\_cell\_angle\_alpha 110.30  
\_cell\_angle\_beta 76.78  
\_cell\_angle\_gamma 93.20  
\_cell\_volume 450.459  
loop\_  
\_atom\_site\_label  
\_atom\_site\_type\_symbol  
\_atom\_site\_fract\_x  
\_atom\_site\_fract\_y  
\_atom\_site\_fract\_z  
C1 C 0.24334 0.52410 0.00180  
N2 N 0.28552 0.38137 -0.15668  
H\*3 H 0.31872 0.37896 -0.31469  
N4 N 0.24661 0.65670 -0.05399  
H\*5 H 0.21486 0.76536 0.06493  
N6 N 0.19873 0.53454 0.21189  
H\*7 H 0.19807 0.43168 0.24619  
H\*8 H 0.16636 0.64057 0.33458  
N9 N 0.29410 0.64129 -0.27637  
N10 N 0.28187 0.24392 -0.09767  
H\*11 H 0.39609 0.19151 -0.14721  
H\*12 H 0.20100 0.67884 -0.32442  
H\*13 H 0.39628 0.70591 -0.30266  
H\*14 H 0.20127 0.16450 -0.16892  
C1+ C -0.18242 -0.06221 0.71123  
N2+ N -0.09103 -0.20402 0.61426  
N'3+ N 0.06433 -0.16452 0.63450  
N'4+ N 0.06316 -0.00604 0.73908  
N'5+ N -0.08485 0.06000 0.78819  
O6+ O -0.13294 -0.34612 0.52210  
N7+ N -0.35290 -0.04578 0.72846  
O8+ O -0.41612 0.09134 0.82127  
O9+ O -0.43000 -0.16730 0.65119

#END

```
data_1f_3
_symmetry_cell_setting      monoclinic
_symmetry_space_group_name_H-M 'P 21/a'
_symmetry_Int_Tables_number 14
loop_
_symmetry_equiv_pos_site_id
_symmetry_equiv_pos_as_xyz
1 x,y,z
2 1/2-x,1/2+y,-z
3 -x,-y,-z
4 1/2+x,1/2-y,z
_cell_length_a             12.865
_cell_length_b             8.143
_cell_length_c             8.958
_cell_angle_alpha          90.00
_cell_angle_beta           109.15
_cell_angle_gamma          90.00
_cell_volume               886.507
loop_
_atom_site_label
_atom_site_type_symbol
_atom_site_fract_x
_atom_site_fract_y
_atom_site_fract_z
C1 C 0.74309 -0.16055 -0.02577
N2 N 0.82160 -0.17189 0.11556
H*3 H 0.90117 -0.17412 0.11808
N4 N 0.77242 -0.15268 -0.15689
H*5 H 0.71353 -0.14407 -0.26449
N6 N 0.63736 -0.15711 -0.03630
H*7 H 0.61913 -0.16333 0.06542
H*8 H 0.57655 -0.14862 -0.14130
N9 N 0.88430 -0.15660 -0.14145
N10 N 0.79060 -0.18003 0.25147
H*11 H 0.82302 -0.08308 0.32351
H*12 H 0.90088 -0.25604 -0.19875
H*13 H 0.90611 -0.05151 -0.18516
H*14 H 0.81779 -0.28713 0.30995
C1+ C -0.10502 0.34299 0.55844
N2+ N -0.05541 0.41869 0.70198
N'3+ N -0.06424 0.58181 0.67266
N'4+ N -0.11689 0.60007 0.51819
N'5+ N -0.14290 0.45739 0.44513
O6+ O -0.00939 0.35854 0.83794
N7+ N -0.11518 0.17133 0.53238
O8+ O -0.16245 0.12375 0.39507
O9+ O -0.07696 0.07787 0.64622
```

#END

```

data_1f_4
_symmetry_cell_setting      monoclinic
_symmetry_space_group_name_H-M 'P 21/a'
_symmetry_Int_Tables_number 14
loop_
_symmetry_equiv_pos_site_id
_symmetry_equiv_pos_as_xyz
1 x,y,z
2 1/2-x,1/2+y,-z
3 -x,-y,-z
4 1/2+x,1/2-y,z
_cell_length_a              13.033
_cell_length_b              8.446
_cell_length_c              8.795
_cell_angle_alpha           90.00
_cell_angle_beta            77.05
_cell_angle_gamma           90.00
_cell_volume                943.501
loop_
_atom_site_label
_atom_site_type_symbol
_atom_site_fract_x
_atom_site_fract_y
_atom_site_fract_z
C1 C 0.49774 0.75208 -0.52609
N2 N 0.42345 0.78400 -0.39788
H*3 H 0.34954 0.80720 -0.41169
N4 N 0.47180 0.75204 -0.66609
H*5 H 0.52755 0.72798 -0.76388
N6 N 0.59602 0.72079 -0.51507
H*7 H 0.61195 0.72213 -0.40739
H*8 H 0.65353 0.69635 -0.60981
N9 N 0.36777 0.78543 -0.67335
N10 N 0.45089 0.78387 -0.25265
H*11 H 0.40792 0.70079 -0.18189
H*12 H 0.36513 0.88388 -0.73916
H*13 H 0.33576 0.69152 -0.71866
H*14 H 0.43722 0.89271 -0.20234
C1+ C 0.13505 0.80323 -0.03976
N2+ N 0.17608 0.89674 -0.16746
N'3+ N 0.16988 1.04732 -0.11418
N'4+ N 0.12694 1.04144 0.03843
N'5+ N 0.10478 0.89488 0.08757
O6+ O 0.21334 0.86004 -0.30851
N7+ N 0.12568 0.63621 -0.04063
O8+ O 0.08673 0.57035 0.08532
O9+ O 0.15635 0.56453 -0.16529

#END

```

```
data_1f_5
```

```

_symmetry_cell_setting      monoclinic
_symmetry_space_group_name_H-M 'C 2/c'
_symmetry_Int_Tables_number 15
loop_
_symmetry_equiv_pos_site_id
_symmetry_equiv_pos_as_xyz
1 x,y,z
2 -x,y,1/2-z
3 -x,-y,-z
4 x,-y,1/2+z
5 1/2+x,1/2+y,z
6 1/2-x,1/2+y,1/2-z
7 1/2-x,1/2-y,-z
8 1/2+x,1/2-y,1/2+z
_cell_length_a             16.653
_cell_length_b             6.623
_cell_length_c             16.250
_cell_angle_alpha          90.00
_cell_angle_beta           93.68
_cell_angle_gamma          90.00
_cell_volume               1788.56
loop_
_atom_site_label
_atom_site_type_symbol
_atom_site_fract_x
_atom_site_fract_y
_atom_site_fract_z
C1 C 0.01161 0.40785 0.62704
N2 N -0.06117 0.33101 0.60593
H*3 H -0.06402 0.18499 0.58668
N4 N 0.07712 0.29009 0.62195
H*5 H 0.13251 0.34697 0.63780
N6 N 0.01901 0.59839 0.65273
H*7 H -0.03190 0.68138 0.65558
H*8 H 0.07313 0.66009 0.66901
N9 N 0.06712 0.09056 0.59470
N10 N -0.12906 0.45417 0.61135
H*11 H -0.16664 0.39283 0.65160
H*12 H 0.09631 0.06845 0.54228
H*13 H 0.08808 -0.00729 0.63938
H*14 H -0.15843 0.46839 0.55473
C1+ C 0.78245 0.09424 0.16072
N2+ N 0.85366 0.10388 0.20880
N'3+ N 0.83314 0.15180 0.28553
N'4+ N 0.75317 0.16928 0.28211
N'5+ N 0.72041 0.13528 0.20716
O6+ O 0.92552 0.07618 0.19045
N7+ N 0.77480 0.04837 0.07546
O8+ O 0.70585 0.04609 0.04149
O9+ O 0.83641 0.01314 0.03920

#END

```

**S12.** Optimized crystal structure coordinates for 5 polymorphs of Triaminoguanidinium 5-nitrotetrazolate 1*N*-oxide (ionic form).

```
data_1g_1
_symmetry_cell_setting      monoclinic
_symmetry_space_group_name_H-M 'P 21/c'
_symmetry_Int_Tables_number 14
loop_
_symmetry_equiv_pos_site_id
_symmetry_equiv_pos_as_xyz
1 x,y,z
2 -x,1/2+y,1/2-z
3 -x,-y,-z
4 x,1/2-y,1/2+z
_cell_length_a             8.542
_cell_length_b             8.669
_cell_length_c             13.409
_cell_angle_alpha          90.00
_cell_angle_beta           79.18
_cell_angle_gamma          90.00
_cell_volume               975.292
loop_
_atom_site_label
_atom_site_type_symbol
_atom_site_fract_x
_atom_site_fract_y
_atom_site_fract_z
C1 C 0.50934 -0.38924 -0.23794
N2 N 0.48843 -0.41516 -0.33313
H*3 H 0.37497 -0.41388 -0.34613
N4 N 0.65655 -0.38966 -0.21667
H*5 H 0.74914 -0.41008 -0.27482
N6 N 0.38303 -0.36291 -0.16401
H*7 H 0.40391 -0.34377 -0.09287
N8 N 0.67522 -0.36226 -0.11658
N9 N 0.62239 -0.44238 -0.40904
H*10 H 0.62996 -0.36033 -0.46409
H*11 H 0.72793 -0.45491 -0.08983
H*12 H 0.74346 -0.26657 -0.11387
H*13 H 0.61443 -0.54867 -0.44004
N14 N 0.23041 -0.36308 -0.18821
H*15 H 0.16236 -0.44665 -0.14788
H*16 H 0.17790 -0.25831 -0.17192
C1+ C 0.04623 -0.34859 0.61579
N2+ N 0.17298 -0.25851 0.57070
N'3+ N 0.11887 -0.11165 0.57714
N'4+ N -0.03329 -0.11631 0.62412
N'5+ N -0.08135 -0.25854 0.64868
O6+ O 0.31388 -0.29518 0.53004
N7+ N 0.04816 -0.51107 0.62642
O8+ O -0.07702 -0.57426 0.66916
```

O9+ O 0.17294 -0.58166 0.59304

#END

data\_1g\_2

\_symmetry\_cell\_setting triclinic

\_symmetry\_space\_group\_name\_H-M 'P -1'

\_symmetry\_Int\_Tables\_number 2

loop\_

\_symmetry\_equiv\_pos\_site\_id

\_symmetry\_equiv\_pos\_as\_xyz

1 x,y,z

2 -x,-y,-z

\_cell\_length\_a 8.689

\_cell\_length\_b 12.097

\_cell\_length\_c 7.278

\_cell\_angle\_alpha 66.14

\_cell\_angle\_beta 99.88

\_cell\_angle\_gamma 134.68

\_cell\_volume 489.913

loop\_

\_atom\_site\_label

\_atom\_site\_type\_symbol

\_atom\_site\_fract\_x

\_atom\_site\_fract\_y

\_atom\_site\_fract\_z

C1 C 0.24995 -0.26274 0.97674

N2 N 0.16090 -0.22875 0.82305

H\*3 H 0.22320 -0.18832 0.67941

N4 N 0.17390 -0.31646 1.16914

H\*5 H 0.04858 -0.32979 1.19208

N6 N 0.41505 -0.24301 0.93803

H\*7 H 0.47807 -0.27011 1.05873

N8 N 0.26976 -0.35113 1.32707

N9 N -0.01149 -0.25039 0.86752

H\*10 H -0.14843 -0.33835 0.82080

H\*11 H 0.33546 -0.27458 1.40184

H\*12 H 0.15455 -0.47523 1.42679

H\*13 H 0.03249 -0.13769 0.79584

N14 N 0.49158 -0.18670 0.73563

H\*15 H 0.65327 -0.07496 0.69511

H\*16 H 0.47236 -0.27562 0.72006

C1+ C -0.25055 0.70947 0.26023

N2+ N -0.06553 0.76939 0.34803

N'3+ N 0.03415 0.92320 0.33320

N'4+ N -0.08820 0.95143 0.24044

N'5+ N -0.26255 0.82409 0.19394

O6+ O 0.00825 0.70357 0.42892

N7+ N -0.40570 0.55176 0.24154

O8+ O -0.56358 0.51752 0.15798

O9+ O -0.37711 0.45657 0.30851

#END

```
data_1g_3
_symmetry_cell_setting      monoclinic
_symmetry_space_group_name_H-M 'P 21/a'
_symmetry_Int_Tables_number 14
loop_
_symmetry_equiv_pos_site_id
_symmetry_equiv_pos_as_xyz
1 x,y,z
2 1/2-x,1/2+y,-z
3 -x,-y,-z
4 1/2+x,1/2-y,z
_cell_length_a             17.174
_cell_length_b             8.077
_cell_length_c             7.328
_cell_angle_alpha          90.00
_cell_angle_beta           73.54
_cell_angle_gamma          90.00
_cell_volume               974.841
loop_
_atom_site_label
_atom_site_type_symbol
_atom_site_fract_x
_atom_site_fract_y
_atom_site_fract_z
C1 C 0.51128 0.73424 0.46668
N2 N 0.50778 0.73227 0.28625
H*3 H 0.45234 0.74586 0.26394
N4 N 0.58288 0.71682 0.50399
H*5 H 0.63309 0.70241 0.39156
N6 N 0.44318 0.75364 0.60980
H*7 H 0.44840 0.75445 0.74454
N8 N 0.58492 0.71931 0.69379
N9 N 0.57982 0.71182 0.13921
H*10 H 0.58928 0.81196 0.05121
H*11 H 0.60746 0.61024 0.72674
H*12 H 0.62034 0.81464 0.71426
H*13 H 0.57640 0.60756 0.06370
N14 N 0.36910 0.77159 0.56704
H*15 H 0.33066 0.67831 0.62833
H*16 H 0.34354 0.88271 0.61584
C1+ C 0.28675 0.79746 0.20843
N2+ N 0.35428 0.87877 0.09762
N'3+ N 0.33521 1.04154 0.11096
N'4+ N 0.25959 1.05420 0.22503
N'5+ N 0.22829 0.90820 0.28685
O6+ O 0.42214 0.82337 -0.00050
N7+ N 0.27915 0.62409 0.23676
O8+ O 0.21382 0.57126 0.34147
O9+ O 0.33724 0.53441 0.15685
```

#END

```
data_lg_4
_symmetry_cell_setting      triclinic
_symmetry_space_group_name_H-M 'P -1'
_symmetry_Int_Tables_number 2
loop_
_symmetry_equiv_pos_site_id
_symmetry_equiv_pos_as_xyz
1 x,y,z
2 -x,-y,-z
_cell_length_a              8.083
_cell_length_b              8.880
_cell_length_c              7.310
_cell_angle_alpha           71.35
_cell_angle_beta            90.13
_cell_angle_gamma           94.17
_cell_volume                 495.7
loop_
_atom_site_label
_atom_site_type_symbol
_atom_site_fract_x
_atom_site_fract_y
_atom_site_fract_z
C1 C 0.74936 0.52899 -0.03137
N2 N 0.74150 0.66518 0.00940
H*3 H 0.73670 0.76753 -0.10342
N4 N 0.75593 0.39063 0.11207
H*5 H 0.75468 0.39404 0.24973
N6 N 0.75065 0.53116 -0.21557
H*7 H 0.75670 0.42540 -0.24042
N8 N 0.76408 0.24993 0.06566
N9 N 0.74032 0.65971 0.20310
H*10 H 0.63393 0.70179 0.23506
H*11 H 0.87037 0.19800 0.11698
H*12 H 0.66408 0.17305 0.12423
H*13 H 0.84022 0.72673 0.22781
N14 N 0.74369 0.67732 -0.36286
H*15 H 0.84693 0.69965 -0.44978
H*16 H 0.64063 0.67471 -0.44252
C1+ C 0.26378 -0.07021 0.28178
N2+ N 0.34200 -0.20480 0.37981
N'3+ N 0.50647 -0.16250 0.35425
N'4+ N 0.52305 -0.00939 0.24567
N'5+ N 0.37799 0.05049 0.19900
O6+ O 0.28289 -0.34322 0.47675
N7+ N 0.09001 -0.05886 0.26888
O8+ O 0.04027 0.07195 0.17434
O9+ O -0.00304 -0.17833 0.35138
```

#END

```

data_lg_5
_symmetry_cell_setting      monoclinic
_symmetry_space_group_name_H-M 'P 21/c'
_symmetry_Int_Tables_number 14
loop_
_symmetry_equiv_pos_site_id
_symmetry_equiv_pos_as_xyz
1 x,y,z
2 -x,1/2+y,1/2-z
3 -x,-y,-z
4 x,1/2-y,1/2+z
_cell_length_a              8.373
_cell_length_b              8.966
_cell_length_c              13.186
_cell_angle_alpha           90.00
_cell_angle_beta            83.05
_cell_angle_gamma           90.00
_cell_volume                982.63
loop_
_atom_site_label
_atom_site_type_symbol
_atom_site_fract_x
_atom_site_fract_y
_atom_site_fract_z
C1 C 0.74342 -0.49133 0.51334
N2 N 0.74775 -0.53416 0.61038
H*3 H 0.74505 -0.64543 0.62528
N4 N 0.74669 -0.34590 0.48952
H*5 H 0.75247 -0.27165 0.54722
N6 N 0.73582 -0.59393 0.44012
H*7 H 0.73274 -0.55691 0.36752
N8 N 0.74204 -0.30403 0.38754
N9 N 0.75568 -0.42475 0.68549
H*10 H 0.85796 -0.43803 0.71920
H*11 H 0.64303 -0.24010 0.38168
H*12 H 0.84311 -0.24560 0.36166
H*13 H 0.65788 -0.43253 0.73923
N14 N 0.73254 -0.74521 0.46699
H*15 H 0.62924 -0.79311 0.44915
H*16 H 0.82931 -0.79861 0.42912
C1+ C -0.23384 0.50718 0.13161
N2+ N -0.15305 0.40019 0.18066
N'3+ N 0.00255 0.44393 0.17072
N'4+ N 0.01171 0.57129 0.11798
N'5+ N -0.12978 0.61299 0.09297
O6+ O -0.20358 0.28269 0.22706
N7+ N -0.40069 0.50726 0.12263
O8+ O -0.45404 0.61266 0.07572
O9+ O -0.48453 0.40359 0.16146

```

#END

**S13.** Optimized crystal structure coordinates for 5 polymorphs of Ammonium 5-(trinitromethyl)tetrazolate 1*N*-oxide (ionic form).

```
data_2a_1
_symmetry_cell_setting      orthorhombic
_symmetry_space_group_name_H-M 'P 21 21 21'
_symmetry_Int_Tables_number 19
loop_
_symmetry_equiv_pos_site_id
_symmetry_equiv_pos_as_xyz
1 x,y,z
2 1/2+x,1/2-y,-z
3 -x,1/2+y,1/2-z
4 1/2-x,-y,1/2+z
_cell_length_a              9.441
_cell_length_b              9.765
_cell_length_c              9.110
_cell_angle_alpha           90.00
_cell_angle_beta            90.00
_cell_angle_gamma           90.00
_cell_volume                 839.863
loop_
_atom_site_label
_atom_site_type_symbol
_atom_site_fract_x
_atom_site_fract_y
_atom_site_fract_z
N1 N 0.33844 0.67007 -0.07646
H*2 H 0.36393 0.73600 -0.16035
H*3 H 0.23262 0.64591 -0.08222
H*4 H 0.39771 0.58221 -0.08586
H*5 H 0.35950 0.71616 0.02259
C1+ C 0.12926 0.12627 0.79447
N'2+ N -0.08324 0.03989 0.79603
N'3+ N -0.06705 0.12280 0.68103
N'4+ N 0.06143 0.17764 0.67671
N5+ N 0.04021 0.04138 0.86964
C6+ C 0.27149 0.15511 0.84652
N7+ N 0.38441 0.03763 0.81885
O8+ O 0.50865 0.07152 0.82540
O9+ O 0.33743 -0.07521 0.79265
N10+ N 0.33476 0.28127 0.76892
O11+ O 0.35983 0.26442 0.63924
O12+ O 0.35370 0.38501 0.84050
N13+ N 0.27316 0.18156 1.01772
O14+ O 0.18369 0.26126 1.06007
O15+ O 0.36343 0.12427 1.09035
O16+ O 0.06660 -0.02330 0.98816
```

#END

data\_2a\_2

```

_symmetry_cell_setting      orthorhombic
_symmetry_space_group_name_H-M 'P 21 21 21'
_symmetry_Int_Tables_number 19
loop_
_symmetry_equiv_pos_site_id
_symmetry_equiv_pos_as_xyz
1 x,y,z
2 1/2+x,1/2-y,-z
3 -x,1/2+y,1/2-z
4 1/2-x,-y,1/2+z
_cell_length_a              9.057
_cell_length_b              10.934
_cell_length_c              8.797
_cell_angle_alpha           90.00
_cell_angle_beta            90.00
_cell_angle_gamma           90.00
_cell_volume                 871.16
loop_
_atom_site_label
_atom_site_type_symbol
_atom_site_fract_x
_atom_site_fract_y
_atom_site_fract_z
N1 N -0.49731 0.23543 -0.12389
H*2 H -0.40320 0.26722 -0.17587
H*3 H -0.56043 0.30824 -0.08869
H*4 H -0.55669 0.18333 -0.19952
H*5 H -0.46893 0.18294 -0.03147
C1+ C -0.11406 0.04204 0.62543
N'2+ N -0.34736 0.02038 0.67826
N'3+ N -0.29501 -0.08091 0.61344
N'4+ N -0.15286 -0.07088 0.57931
N5+ N -0.23407 0.09962 0.68613
C6+ C 0.02750 0.10330 0.61139
N7+ N 0.11999 0.11433 0.76390
O8+ O 0.25159 0.13520 0.74948
O9+ O 0.05208 0.10025 0.88125
N10+ N 0.13092 0.03423 0.50196
O11+ O 0.17271 -0.06454 0.54875
O12+ O 0.16150 0.08173 0.38076
N13+ N 0.00827 0.23872 0.55161
O14+ O -0.07111 0.24825 0.44138
O15+ O 0.07544 0.31949 0.61663
O16+ O -0.24007 0.20824 0.73866

```

#END

```

data_2a_3
_symmetry_cell_setting      orthorhombic
_symmetry_space_group_name_H-M 'P 21 21 21'
_symmetry_Int_Tables_number 19
loop_

```

```

_symmetry_equiv_pos_site_id
_symmetry_equiv_pos_as_xyz
1 x,y,z
2 1/2+x,1/2-y,-z
3 -x,1/2+y,1/2-z
4 1/2-x,-y,1/2+z
_cell_length_a      10.519
_cell_length_b      9.133
_cell_length_c      9.046
_cell_angle_alpha   90.00
_cell_angle_beta    90.00
_cell_angle_gamma   90.00
_cell_volume        869.049
loop_
_atom_site_label
_atom_site_type_symbol
_atom_site_fract_x
_atom_site_fract_y
_atom_site_fract_z
N1 N 0.73922 0.87850 0.51538
H*2 H 0.80840 0.89633 0.43719
H*3 H 0.67556 0.80228 0.47654
H*4 H 0.78048 0.84041 0.61092
H*5 H 0.69244 0.97498 0.53687
C1+ C 0.04471 0.86743 -0.88899
N'2+ N 0.02810 0.80981 -0.65634
N'3+ N -0.07814 0.87450 -0.70303
N'4+ N -0.07131 0.91150 -0.84461
N5+ N 0.10737 0.80501 -0.77286
C6+ C 0.10467 0.88469 -1.03247
N7+ N 0.11278 0.74052 -1.12980
O8+ O 0.13105 0.75814 -1.26180
O9+ O 0.09927 0.62562 -1.06473
N10+ N 0.03080 0.99361 -1.13017
O11+ O -0.07319 0.95051 -1.16961
O12+ O 0.08004 1.11086 -1.15904
N13+ N 0.24622 0.94069 -1.01661
O14+ O 0.25888 1.04440 -0.93439
O15+ O 0.32797 0.87949 -1.08870
O16+ O 0.22006 0.75347 -0.77246

```

#END

```

data_2a_4
_symmetry_cell_setting      orthorhombic
_symmetry_space_group_name_H-M 'P 21 21 21'
_symmetry_Int_Tables_number 19
loop_
_symmetry_equiv_pos_site_id
_symmetry_equiv_pos_as_xyz
1 x,y,z
2 1/2+x,1/2-y,-z

```

```

3 -x,1/2+y,1/2-z
4 1/2-x,-y,1/2+z
_cell_length_a      11.143
_cell_length_b      9.217
_cell_length_c      8.657
_cell_angle_alpha   90.00
_cell_angle_beta    90.00
_cell_angle_gamma   90.00
_cell_volume        889.117
loop_
_atom_site_label
_atom_site_type_symbol
_atom_site_fract_x
_atom_site_fract_y
_atom_site_fract_z
N1 N -0.26326 0.12041 -0.46812
H*2 H -0.28542 0.13147 -0.58277
H*3 H -0.33542 0.07930 -0.40852
H*4 H -0.19164 0.05083 -0.45768
H*5 H -0.24056 0.22004 -0.42351
C1+ C 0.03191 0.87877 0.59007
N'2+ N -0.00081 0.84406 0.83514
N'3+ N -0.10014 0.89195 0.76617
N'4+ N -0.08341 0.91463 0.61640
N5+ N 0.08409 0.83568 0.72513
C6+ C 0.09977 0.88733 0.44722
N7+ N 0.12534 0.73680 0.36473
O8+ O 0.15314 0.74261 0.22855
O9+ O 0.11423 0.62923 0.44386
N10+ N 0.03247 0.97679 0.32432
O11+ O -0.05849 0.91986 0.27585
O12+ O 0.07360 1.09400 0.28670
N13+ N 0.22715 0.95840 0.47444
O14+ O 0.22495 1.06982 0.54867
O15+ O 0.31400 0.89941 0.41729
O16+ O 0.19277 0.79666 0.74553

```

#END

```

data_2a_5
_symmetry_cell_setting      monoclinic
_symmetry_space_group_name_H-M 'P 21/c'
_symmetry_Int_Tables_number 14
loop_
_symmetry_equiv_pos_site_id
_symmetry_equiv_pos_as_xyz
1 x,y,z
2 -x,1/2+y,1/2-z
3 -x,-y,-z
4 x,1/2-y,1/2+z
_cell_length_a      10.295
_cell_length_b      10.251

```

```

_cell_length_c          8.579
_cell_angle_alpha      90.00
_cell_angle_beta       72.60
_cell_angle_gamma      90.00
_cell_volume           863.947
loop_
_atom_site_label
_atom_site_type_symbol
_atom_site_fract_x
_atom_site_fract_y
_atom_site_fract_z
N1 N 0.18824 0.43445 -0.08181
H*2 H 0.12925 0.40127 -0.15130
H*3 H 0.26754 0.37087 -0.09193
H*4 H 0.22615 0.52514 -0.12237
H*5 H 0.13002 0.44051 0.03837
C1+ C 0.18283 -0.09686 0.79434
N'2+ N 0.03170 -0.24867 0.80980
N'3+ N -0.00145 -0.14127 0.74278
N'4+ N 0.08846 -0.04638 0.73171
N5+ N 0.14815 -0.22198 0.84397
C6+ C 0.30215 -0.03449 0.81793
N7+ N 0.44345 -0.07683 0.69344
O8+ O 0.53930 -0.00365 0.68219
O9+ O 0.44362 -0.17762 0.61963
N10+ N 0.29776 0.11453 0.79651
O11+ O 0.30980 0.14972 0.65751
O12+ O 0.28248 0.18352 0.91623
N13+ N 0.31492 -0.06416 0.99360
O14+ O 0.21083 -0.04749 1.10405
O15+ O 0.42547 -0.09714 1.00382
O16+ O 0.21172 -0.29938 0.91202

```

#END

**S14.** Optimized crystal structure coordinates for 5 polymorphs of Hydroxylammonium 5-(trinitromethyl)tetrazolate 1*N*-oxide (ionic form).

```

data_2b_1
_symmetry_cell_setting      orthorhombic
_symmetry_space_group_name_H-M 'P 21 21 21'
_symmetry_Int_Tables_number 19
loop_
_symmetry_equiv_pos_site_id
_symmetry_equiv_pos_as_xyz
1 x,y,z
2 1/2+x,1/2-y,-z
3 -x,1/2+y,1/2-z
4 1/2-x,-y,1/2+z
_cell_length_a              8.740
_cell_length_b              12.546
_cell_length_c              8.556

```

```

_cell_angle_alpha      90.00
_cell_angle_beta       90.00
_cell_angle_gamma     90.00
_cell_volume          938.183
loop_
_atom_site_label
_atom_site_type_symbol
_atom_site_fract_x
_atom_site_fract_y
_atom_site_fract_z
N1 N -0.51401 -0.26026 -0.37219
H*2 H -0.56620 -0.33311 -0.38829
H*3 H -0.57708 -0.21652 -0.29274
H*4 H -0.40414 -0.27266 -0.33160
O5 O -0.51444 -0.21294 -0.52115
H*6 H -0.46564 -0.14325 -0.51101
C1+ C -0.62391 0.55301 0.13130
N'2+ N -0.86184 0.53081 0.19892
N'3+ N -0.81098 0.44532 0.12240
N'4+ N -0.66611 0.45616 0.07900
N5+ N -0.74472 0.60019 0.20502
C6+ C -0.47877 0.60770 0.11194
N7+ N -0.37385 0.61235 0.26306
O8+ O -0.23876 0.63184 0.24127
O9+ O -0.43682 0.59542 0.38675
N10+ N -0.37803 0.55219 -0.01143
O11+ O -0.33128 0.46479 0.02728
O12+ O -0.35413 0.59811 -0.13444
N13+ N -0.50321 0.72762 0.06092
O14+ O -0.59213 0.73942 -0.04635
O15+ O -0.43031 0.79597 0.12863
O16+ O -0.74843 0.69279 0.26647

```

#END

```

data_2b_2
_symmetry_cell_setting      orthorhombic
_symmetry_space_group_name_H-M 'P 21 21 21'
_symmetry_Int_Tables_number 19
loop_
_symmetry_equiv_pos_site_id
_symmetry_equiv_pos_as_xyz
1 x,y,z
2 1/2+x,1/2-y,-z
3 -x,1/2+y,1/2-z
4 1/2-x,-y,1/2+z
_cell_length_a              10.191
_cell_length_b              10.019
_cell_length_c              8.540
_cell_angle_alpha           90.00
_cell_angle_beta            90.00
_cell_angle_gamma           90.00

```

```

_cell_volume          871.965
loop_
_atom_site_label
_atom_site_type_symbol
_atom_site_fract_x
_atom_site_fract_y
_atom_site_fract_z
N1 N 0.85077 -0.14594 0.09174
H*2 H 0.93500 -0.09543 0.06090
H*3 H 0.85618 -0.24214 0.04873
H*4 H 0.84273 -0.14637 0.21231
O5 O 0.74869 -0.07319 0.02117
H*6 H 0.66654 -0.11804 0.04768
C1+ C 0.15150 0.12794 -0.20619
N'2+ N -0.04952 0.05461 -0.20783
N'3+ N -0.02457 0.12242 -0.33876
N'4+ N 0.09727 0.16895 -0.34166
N5+ N 0.06105 0.05763 -0.12198
C6+ C 0.28193 0.15436 -0.14530
N7+ N 0.38120 0.03258 -0.15266
O8+ O 0.49746 0.06014 -0.14174
O9+ O 0.33296 -0.07700 -0.16954
N10+ N 0.35092 0.26557 -0.23888
O11+ O 0.37937 0.23497 -0.37243
O12+ O 0.37059 0.37225 -0.17467
N13+ N 0.27670 0.19716 0.03277
O14+ O 0.19635 0.28278 0.06188
O15+ O 0.35350 0.14481 0.12268
O16+ O 0.07625 0.00579 0.01322

```

#END

```

data_2b_3
_symmetry_cell_setting      orthorhombic
_symmetry_space_group_name_H-M 'P b c a'
_symmetry_Int_Tables_number 61
loop_
_symmetry_equiv_pos_site_id
_symmetry_equiv_pos_as_xyz
1 x,y,z
2 1/2-x,1/2+y,z
3 x,1/2-y,1/2+z
4 1/2-x,-y,1/2+z
5 -x,-y,-z
6 1/2+x,1/2-y,-z
7 -x,1/2+y,1/2-z
8 1/2+x,y,1/2-z
_cell_length_a             8.837
_cell_length_b             11.879
_cell_length_c             16.899
_cell_angle_alpha          90.00
_cell_angle_beta           90.00

```

```

_cell_angle_gamma      90.00
_cell_volume           1773.97
loop_
_atom_site_label
_atom_site_type_symbol
_atom_site_fract_x
_atom_site_fract_y
_atom_site_fract_z
N1 N 0.22773 0.28808 -0.07965
H*2 H 0.31848 0.24244 -0.05871
H*3 H 0.13491 0.27222 -0.04420
H*4 H 0.25522 0.37258 -0.07869
O5 O 0.20582 0.24866 -0.15725
H*6 H 0.12023 0.29004 -0.17940
C1+ C 0.15721 0.04907 0.60753
N'2+ N -0.08503 0.03181 0.58772
N'3+ N -0.03906 0.13464 0.56728
N'4+ N 0.10830 0.14829 0.57875
N5+ N 0.03805 -0.02350 0.61375
C6+ C 0.30820 0.01764 0.63316
N7+ N 0.39813 -0.06266 0.57473
O8+ O 0.53505 -0.06644 0.58364
O9+ O 0.32313 -0.11259 0.52605
N10+ N 0.41108 0.12167 0.64164
O11+ O 0.44244 0.16751 0.57942
O12+ O 0.45136 0.14959 0.70772
N13+ N 0.30394 -0.04636 0.71515
O14+ O 0.22784 -0.00067 0.76541
O15+ O 0.37799 -0.13208 0.72162
O16+ O 0.04057 -0.12409 0.64011

```

#END

```

data_2b_4
_symmetry_cell_setting      monoclinic
_symmetry_space_group_name_H-M 'P 21/a'
_symmetry_Int_Tables_number 14
loop_
_symmetry_equiv_pos_site_id
_symmetry_equiv_pos_as_xyz
1 x,y,z
2 1/2-x,1/2+y,-z
3 -x,-y,-z
4 1/2+x,1/2-y,z
_cell_length_a              11.803
_cell_length_b              9.069
_cell_length_c              9.971
_cell_angle_alpha           90.00
_cell_angle_beta            55.89
_cell_angle_gamma           90.00
_cell_volume                 883.693
loop_

```

```

_atom_site_label
_atom_site_type_symbol
_atom_site_fract_x
_atom_site_fract_y
_atom_site_fract_z
N1 N 0.71691 0.26446 0.66401
H*2 H 0.69072 0.17228 0.62665
H*3 H 0.79222 0.23614 0.68201
H*4 H 0.75141 0.34503 0.57616
O5 O 0.59508 0.30657 0.80935
H*6 H 0.61556 0.39416 0.84908
C1+ C 0.05205 0.34852 0.28453
N'2+ N 0.05233 0.58502 0.32133
N'3+ N -0.07268 0.54007 0.36984
N'4+ N -0.07663 0.39619 0.34884
N5+ N 0.13296 0.46489 0.26612
C6+ C 0.10757 0.20106 0.23190
N7+ N 0.13735 0.11503 0.34753
O8+ O 0.14912 -0.01853 0.33060
O9+ O 0.14488 0.18933 0.44324
N10+ N 0.00752 0.10009 0.22196
O11+ O -0.09649 0.07051 0.35232
O12+ O 0.03863 0.05940 0.08897
N13+ N 0.24829 0.20397 0.06031
O14+ O 0.24684 0.27687 -0.04055
O15+ O 0.34268 0.13216 0.04273
O16+ O 0.26094 0.46246 0.20617

```

#END

```

data_2b_5
_symmetry_cell_setting      monoclinic
_symmetry_space_group_name_H-M 'P 21/a'
_symmetry_Int_Tables_number 14
loop_
_symmetry_equiv_pos_site_id
_symmetry_equiv_pos_as_xyz
1 x,y,z
2 1/2-x,1/2+y,-z
3 -x,-y,-z
4 1/2+x,1/2-y,z
_cell_length_a              7.373
_cell_length_b              16.972
_cell_length_c              8.604
_cell_angle_alpha           90.00
_cell_angle_beta            56.01
_cell_angle_gamma           90.00
_cell_volume                892.695
loop_
_atom_site_label
_atom_site_type_symbol
_atom_site_fract_x

```

```

_atom_site_fract_y
_atom_site_fract_z
N1 N 0.03969 0.16932 0.31834
H*2 H -0.06755 0.15785 0.45933
H*3 H -0.01134 0.13909 0.24511
H*4 H 0.04207 0.22928 0.29671
O5 O 0.24290 0.14184 0.27498
H*6 H 0.34991 0.15166 0.14169
C1+ C 0.50227 0.63804 0.11306
N'2+ N 0.82656 0.68356 0.01099
N'3+ N 0.78769 0.68862 -0.12249
N'4+ N 0.59121 0.66119 -0.06521
N5+ N 0.64738 0.65124 0.16127
C6+ C 0.29195 0.60094 0.24178
N7+ N 0.11094 0.65606 0.40351
O8+ O -0.07807 0.63387 0.48140
O9+ O 0.17606 0.71561 0.43466
N10+ N 0.18734 0.57214 0.13919
O11+ O 0.12978 0.62463 0.07968
O12+ O 0.17154 0.50146 0.12507
N13+ N 0.31463 0.52835 0.34493
O14+ O 0.46056 0.48309 0.24174
O15+ O 0.18456 0.52289 0.51351
O16+ O 0.62184 0.63528 0.31723

```

#END

**S15.** Optimized crystal structure coordinates for 5 polymorphs of Hydrazinium 5-(trinitromethyl)tetrazolate 1*N*-oxide (ionic form).

```

data_2c_1
_symmetry_cell_setting      orthorhombic
_symmetry_space_group_name_H-M 'P b c a'
_symmetry_Int_Tables_number 61
loop_
_symmetry_equiv_pos_site_id
_symmetry_equiv_pos_as_xyz
1 x,y,z
2 1/2-x,1/2+y,z
3 x,1/2-y,1/2+z
4 1/2-x,-y,1/2+z
5 -x,-y,-z
6 1/2+x,1/2-y,-z
7 -x,1/2+y,1/2-z
8 1/2+x,y,1/2-z
_cell_length_a              11.920
_cell_length_b              11.833
_cell_length_c              12.774
_cell_angle_alpha           90.00
_cell_angle_beta            90.00
_cell_angle_gamma           90.00
_cell_volume                 1801.76

```

```

loop_
_atom_site_label
_atom_site_type_symbol
_atom_site_fract_x
_atom_site_fract_y
_atom_site_fract_z
N1 N 0.21488 0.01495 0.23444
H*2 H 0.27411 -0.03916 0.26473
H*3 H 0.14669 0.01133 0.28367
N4 N 0.18089 -0.02781 0.13307
H*5 H 0.12120 0.02565 0.10406
H*6 H 0.24935 -0.02513 0.08502
H*7 H 0.24676 0.09610 0.23551
C1+ C -0.03923 0.76929 0.05884
N'2+ N -0.14585 0.75705 0.19668
N'3+ N -0.15123 0.86077 0.15631
N'4+ N -0.08695 0.87141 0.07212
N5+ N -0.07470 0.69798 0.13602
C6+ C 0.04190 0.73376 -0.01926
N7+ N -0.00604 0.65567 -0.10973
O8+ O 0.05065 0.64916 -0.18903
O9+ O -0.09508 0.60995 -0.09246
N10+ N 0.09212 0.83591 -0.07757
O11+ O 0.02618 0.88544 -0.13389
O12+ O 0.19049 0.85895 -0.06309
N13+ N 0.14096 0.66429 0.03205
O14+ O 0.18145 0.70800 0.10905
O15+ O 0.16952 0.57677 -0.01001
O16+ O -0.04556 0.59536 0.14996

```

#END

```

data_2c_2
_symmetry_cell_setting      monoclinic
_symmetry_space_group_name_H-M 'P 21/a'
_symmetry_Int_Tables_number 14
loop_
_symmetry_equiv_pos_site_id
_symmetry_equiv_pos_as_xyz
1 x,y,z
2 1/2-x,1/2+y,-z
3 -x,-y,-z
4 1/2+x,1/2-y,z
_cell_length_a              17.498
_cell_length_b              6.926
_cell_length_c              7.904
_cell_angle_alpha           90.00
_cell_angle_beta            86.76
_cell_angle_gamma           90.00
_cell_volume                956.364
loop_
_atom_site_label

```

```

_atom_site_type_symbol
_atom_site_fract_x
_atom_site_fract_y
_atom_site_fract_z
N1 N 0.42439 -0.06676 0.27939
H*2 H 0.46671 0.01870 0.22329
H*3 H 0.43482 -0.07458 0.40599
N4 N 0.43226 -0.25891 0.20826
H*5 H 0.39060 -0.34334 0.26595
H*6 H 0.42267 -0.24953 0.08221
H*7 H 0.37219 -0.00010 0.26713
C1+ C 0.61074 0.45674 0.23708
N'2+ N 0.56712 0.22047 0.39638
N'3+ N 0.54029 0.20711 0.24230
N'4+ N 0.56563 0.34934 0.14165
N5+ N 0.61169 0.37869 0.39552
C6+ C 0.65130 0.63422 0.19314
N7+ N 0.74115 0.61333 0.15944
O8+ O 0.77335 0.74456 0.08095
O9+ O 0.76985 0.46833 0.21357
N10+ N 0.62404 0.72129 0.02757
O11+ O 0.64119 0.62700 -0.09872
O12+ O 0.58830 0.87224 0.03529
N13+ N 0.63984 0.78992 0.33865
O14+ O 0.57393 0.81220 0.39049
O15+ O 0.69602 0.87553 0.38255
O16+ O 0.64685 0.44310 0.52080

```

#END

```

data_2c_3
_symmetry_cell_setting      orthorhombic
_symmetry_space_group_name_H-M 'P 21 21 21'
_symmetry_Int_Tables_number 19
loop_
_symmetry_equiv_pos_site_id
_symmetry_equiv_pos_as_xyz
1 x,y,z
2 1/2+x,1/2-y,-z
3 -x,1/2+y,1/2-z
4 1/2-x,-y,1/2+z
_cell_length_a              8.727
_cell_length_b              8.764
_cell_length_c              12.480
_cell_angle_alpha           90.00
_cell_angle_beta            90.00
_cell_angle_gamma           90.00
_cell_volume                 954.513
loop_
_atom_site_label
_atom_site_type_symbol
_atom_site_fract_x

```

```

_atom_site_fract_y
_atom_site_fract_z
N1 N 0.73196 -0.38873 -0.01474
H*2 H 0.83968 -0.43496 -0.02281
H*3 H 0.68823 -0.37744 -0.09087
N4 N 0.74788 -0.23765 0.03090
H*5 H 0.64062 -0.19189 0.03753
H*6 H 0.79294 -0.24974 0.10598
H*7 H 0.66415 -0.46422 0.02757
C1+ C 0.62502 0.11379 -0.18954
N'2+ N 0.38873 0.03803 -0.20632
N'3+ N 0.42999 0.12112 -0.29100
N'4+ N 0.57357 0.16961 -0.28339
N5+ N 0.51101 0.03279 -0.14086
C6+ C 0.77310 0.13574 -0.13883
N7+ N 0.88507 -0.00670 -0.14306
O8+ O 1.02047 0.01966 -0.12722
O9+ O 0.82651 -0.12898 -0.16237
N10+ N 0.86423 0.26471 -0.19342
O11+ O 0.90642 0.23552 -0.28400
O12+ O 0.88585 0.38238 -0.14376
N13+ N 0.75496 0.17568 -0.01594
O14+ O 0.66213 0.27501 0.00268
O15+ O 0.83575 0.10837 0.04775
O16+ O 0.51670 -0.03385 -0.05009

```

#END

```

data_2c_4
_symmetry_cell_setting      orthorhombic
_symmetry_space_group_name_H-M 'P 21 21 21'
_symmetry_Int_Tables_number 19
loop_
_symmetry_equiv_pos_site_id
_symmetry_equiv_pos_as_xyz
1 x,y,z
2 1/2+x,1/2-y,-z
3 -x,1/2+y,1/2-z
4 1/2-x,-y,1/2+z
_cell_length_a              8.725
_cell_length_b              10.323
_cell_length_c              10.311
_cell_angle_alpha           90.00
_cell_angle_beta            90.00
_cell_angle_gamma           90.00
_cell_volume                 928.693
loop_
_atom_site_label
_atom_site_type_symbol
_atom_site_fract_x
_atom_site_fract_y
_atom_site_fract_z

```

N1 N 0.43405 -0.30201 -0.11411  
 H\*2 H 0.33001 -0.30837 -0.16060  
 H\*3 H 0.48449 -0.39180 -0.12130  
 N4 N 0.40553 -0.27589 0.02174  
 H\*5 H 0.50928 -0.27117 0.06745  
 H\*6 H 0.35391 -0.18727 0.02793  
 H\*7 H 0.50154 -0.23540 -0.16232  
 C1+ C 0.38045 0.06731 0.12822  
 N'2+ N 0.16076 0.07620 0.22781  
 N'3+ N 0.15590 -0.01161 0.13313  
 N'4+ N 0.28806 -0.01949 0.07002  
 N5+ N 0.30232 0.12767 0.22569  
 C6+ C 0.53692 0.10263 0.09595  
 N7+ N 0.66450 0.04862 0.19129  
 O8+ O 0.79536 0.04722 0.14957  
 O9+ O 0.62069 0.01267 0.29682  
 N10+ N 0.58353 0.04933 -0.03795  
 O11+ O 0.59500 -0.06798 -0.04265  
 O12+ O 0.60400 0.12588 -0.12614  
 N13+ N 0.55862 0.25468 0.09515  
 O14+ O 0.46137 0.31300 0.03491  
 O15+ O 0.66970 0.29926 0.15054  
 O16+ O 0.35162 0.21717 0.30009

#END

data\_2c\_5  
 \_symmetry\_cell\_setting orthorhombic  
 \_symmetry\_space\_group\_name\_H-M 'P b c a'  
 \_symmetry\_Int\_Tables\_number 61  
 loop\_  
 \_symmetry\_equiv\_pos\_site\_id  
 \_symmetry\_equiv\_pos\_as\_xyz  
 1 x,y,z  
 2 1/2-x,1/2+y,z  
 3 x,1/2-y,1/2+z  
 4 1/2-x,-y,1/2+z  
 5 -x,-y,-z  
 6 1/2+x,1/2-y,-z  
 7 -x,1/2+y,1/2-z  
 8 1/2+x,y,1/2-z  
 \_cell\_length\_a 17.586  
 \_cell\_length\_b 9.779  
 \_cell\_length\_c 11.494  
 \_cell\_angle\_alpha 90.00  
 \_cell\_angle\_beta 90.00  
 \_cell\_angle\_gamma 90.00  
 \_cell\_volume 1976.66  
 loop\_  
 \_atom\_site\_label  
 \_atom\_site\_type\_symbol  
 \_atom\_site\_fract\_x

```

_atom_site_fract_y
_atom_site_fract_z
N1 N 0.62740 0.41419 0.48294
H*2 H 0.67325 0.47776 0.49573
H*3 H 0.59344 0.42339 0.55538
N4 N 0.65509 0.27487 0.47772
H*5 H 0.60916 0.21231 0.46632
H*6 H 0.68942 0.26700 0.40633
H*7 H 0.59739 0.44796 0.41125
C1+ C 0.06776 0.63826 0.28072
N'2+ N -0.05352 0.67335 0.25774
N'3+ N -0.02527 0.60692 0.16617
N'4+ N 0.04873 0.58398 0.17709
N5+ N 0.00485 0.69462 0.33110
C6+ C 0.14207 0.64664 0.33524
N7+ N 0.15575 0.54435 0.44029
O8+ O 0.22187 0.52357 0.46716
O9+ O 0.09939 0.49512 0.48410
N10+ N 0.20594 0.61205 0.24831
O11+ O 0.20721 0.49315 0.21737
O12+ O 0.24866 0.70323 0.21773
N13+ N 0.15721 0.79429 0.38624
O14+ O 0.14306 0.88674 0.31948
O15+ O 0.18281 0.80289 0.48418
O16+ O 0.00133 0.75746 0.42819

```

#END

**S16.** Optimized crystal structure coordinates for 5 polymorphs of Guanidinium 5-(trinitromethyl)tetrazolate 1*N*-oxide (ionic form).

```

data_2d_1
_symmetry_cell_setting      orthorhombic
_symmetry_space_group_name_H-M 'P c a 21'
_symmetry_Int_Tables_number 29
loop_
_symmetry_equiv_pos_site_id
_symmetry_equiv_pos_as_xyz
1 x,y,z
2 1/2-x,y,1/2+z
3 1/2+x,-y,z
4 -x,-y,1/2+z
_cell_length_a              16.357
_cell_length_b              8.434
_cell_length_c              7.621
_cell_angle_alpha           90.00
_cell_angle_beta            90.00
_cell_angle_gamma           90.00
_cell_volume                1051.35
loop_
_atom_site_label
_atom_site_type_symbol

```

```

_atom_site_fract_x
_atom_site_fract_y
_atom_site_fract_z
C1 C 0.25871 0.75349 0.54461
N2 N 0.18174 0.76982 0.60098
H*3 H 0.14589 0.67442 0.62371
H*4 H 0.15718 0.87804 0.62249
N5 N 0.28962 0.60879 0.51724
H*6 H 0.34762 0.59377 0.47467
H*7 H 0.25588 0.51023 0.53833
N8 N 0.30477 0.88186 0.51561
H*9 H 0.28262 0.99227 0.53545
H*10 H 0.36306 0.87219 0.47301
C1+ C 0.39632 0.21930 0.26276
N'2+ N 0.29448 0.31038 0.10907
N'3+ N 0.29319 0.15237 0.11084
N'4+ N 0.35463 0.09260 0.20322
N5+ N 0.35979 0.35486 0.20427
C6+ C 0.47086 0.22362 0.36603
N7+ N 0.45955 0.27041 0.56617
O8+ O 0.51561 0.23537 0.66443
O9+ O 0.39603 0.33584 0.60413
N10+ N 0.51230 0.05964 0.37233
O11+ O 0.47461 -0.03995 0.45461
O12+ O 0.57723 0.04238 0.29646
N13+ N 0.53389 0.34758 0.28908
O14+ O 0.54452 0.33722 0.13215
O15+ O 0.56710 0.43787 0.39089
O16+ O 0.38299 0.49717 0.23133

```

#END

```

data_2d_2
_symmetry_cell_setting      triclinic
_symmetry_space_group_name_H-M 'P -1'
_symmetry_Int_Tables_number 2
loop_
_symmetry_equiv_pos_site_id
_symmetry_equiv_pos_as_xyz
1 x,y,z
2 -x,-y,-z
_cell_length_a              9.716
_cell_length_b              10.107
_cell_length_c              6.006
_cell_angle_alpha           81.05
_cell_angle_beta            67.56
_cell_angle_gamma           91.34
_cell_volume                 536.274
loop_
_atom_site_label
_atom_site_type_symbol
_atom_site_fract_x

```

```

_atom_site_fract_y
_atom_site_fract_z
C1 C 0.31419 0.27089 -0.17101
N2 N 0.24883 0.27867 0.06641
H*3 H 0.22238 0.36761 0.12136
H*4 H 0.22397 0.19585 0.19780
N5 N 0.34581 0.38216 -0.34097
H*6 H 0.39517 0.37854 -0.52134
H*7 H 0.32126 0.47312 -0.29400
N8 N 0.34794 0.15183 -0.23847
H*9 H 0.32503 0.06652 -0.11305
H*10 H 0.39734 0.14369 -0.41683
C1+ C 0.70305 0.22173 -0.07611
N'2+ N 0.53373 0.30320 0.21366
N'3+ N 0.50347 0.17083 0.24278
N'4+ N 0.60442 0.11769 0.06873
N5+ N 0.65975 0.33731 0.01138
C6+ C 0.83367 0.22249 -0.29954
N7+ N 0.98993 0.23632 -0.27470
O8+ O 1.09664 0.20246 -0.43672
O9+ O 0.98946 0.27841 -0.09625
N10+ N 0.83438 0.09002 -0.39674
O11+ O 0.85334 -0.00775 -0.26910
O12+ O 0.81586 0.09286 -0.58683
N13+ N 0.84054 0.34319 -0.50657
O14+ O 0.72433 0.35457 -0.53552
O15+ O 0.95909 0.41071 -0.62063
O16+ O 0.72392 0.45590 -0.08071

```

#END

```

data_2d_3
_symmetry_cell_setting      triclinic
_symmetry_space_group_name_H-M 'P -1'
_symmetry_Int_Tables_number 2
loop_
_symmetry_equiv_pos_site_id
_symmetry_equiv_pos_as_xyz
1 x,y,z
2 -x,-y,-z
_cell_length_a              8.194
_cell_length_b              7.398
_cell_length_c              9.061
_cell_angle_alpha           84.84
_cell_angle_beta            89.98
_cell_angle_gamma           90.57
_cell_volume                 547.017
loop_
_atom_site_label
_atom_site_type_symbol
_atom_site_fract_x
_atom_site_fract_y

```

```

_atom_site_fract_z
C1 C 0.55628 -0.26473 0.80803
N2 N 0.65215 -0.27329 0.68943
H*3 H 0.77450 -0.28481 0.69967
H*4 H 0.60504 -0.26847 0.58610
N5 N 0.62197 -0.27141 0.94348
H*6 H 0.55177 -0.26516 1.03458
H*7 H 0.74373 -0.28290 0.95870
N8 N 0.39472 -0.24950 0.79118
H*9 H 0.34257 -0.24422 0.68985
H*10 H 0.32006 -0.24282 0.87929
C1+ C -0.21969 0.23894 0.66677
N'2+ N -0.48264 0.25534 0.69579
N'3+ N -0.44629 0.24791 0.55308
N'4+ N -0.28666 0.23818 0.53116
N5+ N -0.34011 0.25060 0.76950
C6+ C -0.04847 0.23697 0.70794
N7+ N 0.01572 0.04982 0.78442
O8+ O 0.16329 0.02925 0.78460
O9+ O -0.08742 -0.05677 0.83504
N10+ N 0.06233 0.27599 0.57110
O11+ O 0.06221 0.15666 0.48715
O12+ O 0.13849 0.41872 0.55733
N13+ N -0.00962 0.38229 0.82106
O14+ O -0.06330 0.53186 0.78531
O15+ O 0.07184 0.33504 0.92954
O16+ O -0.32280 0.25833 0.90869

```

#END

```

data_2d_4
_symmetry_cell_setting      monoclinic
_symmetry_space_group_name_H-M 'P 21/c'
_symmetry_Int_Tables_number 14
loop_
_symmetry_equiv_pos_site_id
_symmetry_equiv_pos_as_xyz
1 x,y,z
2 -x,1/2+y,1/2-z
3 -x,-y,-z
4 x,1/2-y,1/2+z
_cell_length_a              8.107
_cell_length_b              9.161
_cell_length_c              14.166
_cell_angle_alpha           90.00
_cell_angle_beta            93.82
_cell_angle_gamma           90.00
_cell_volume                 1049.75
loop_
_atom_site_label
_atom_site_type_symbol
_atom_site_fract_x

```

```

_atom_site_fract_y
_atom_site_fract_z
C1 C -0.04546 -0.30516 0.63024
N2 N -0.14055 -0.18576 0.62752
H*3 H -0.26482 -0.19299 0.62843
H*4 H -0.09092 -0.08482 0.62447
N5 N -0.11452 -0.43739 0.63426
H*6 H -0.04496 -0.52902 0.63637
H*7 H -0.23827 -0.44955 0.63530
N8 N 0.11869 -0.29233 0.62894
H*9 H 0.17340 -0.19348 0.62592
H*10 H 0.19282 -0.38111 0.63095
C1+ C 0.29939 0.32844 0.11994
N'2+ N 0.03215 0.31658 0.12575
N'3+ N 0.08020 0.45517 0.11940
N'4+ N 0.24279 0.46660 0.11590
N5+ N 0.16987 0.23466 0.12661
C6+ C 0.46878 0.27656 0.12194
N7+ N 0.52214 0.20527 0.02659
O8+ O 0.67047 0.19619 0.01773
O9+ O 0.41100 0.16700 -0.02936
N10+ N 0.59276 0.40233 0.14091
O11+ O 0.59614 0.49043 0.07686
O12+ O 0.67471 0.40446 0.21615
N13+ N 0.50285 0.15597 0.20066
O14+ O 0.45575 0.18809 0.27736
O15+ O 0.57495 0.04574 0.17926
O16+ O 0.17627 0.09596 0.13373

```

#END

```

data_2d_5
_symmetry_cell_setting      monoclinic
_symmetry_space_group_name_H-M 'P 21/a'
_symmetry_Int_Tables_number 14
loop_
_symmetry_equiv_pos_site_id
_symmetry_equiv_pos_as_xyz
1 x,y,z
2 1/2-x,1/2+y,-z
3 -x,-y,-z
4 1/2+x,1/2-y,z
_cell_length_a              15.961
_cell_length_b              7.294
_cell_length_c              9.025
_cell_angle_alpha           90.00
_cell_angle_beta            91.56
_cell_angle_gamma           90.00
_cell_volume                1050.3
loop_
_atom_site_label
_atom_site_type_symbol

```

```

_atom_site_fract_x
_atom_site_fract_y
_atom_site_fract_z
C1 C 0.77332 -0.22071 -0.17544
N2 N 0.80721 -0.20171 -0.03915
H*3 H 0.86994 -0.20594 -0.02110
H*4 H 0.77107 -0.18257 0.04975
N5 N 0.82267 -0.24587 -0.29109
H*6 H 0.79837 -0.26054 -0.39498
H*7 H 0.88571 -0.25097 -0.27797
N8 N 0.69008 -0.21454 -0.19608
H*9 H 0.65165 -0.19566 -0.11024
H*10 H 0.66318 -0.22859 -0.29811
C1+ C -0.10185 0.24602 0.65713
N'2+ N -0.23665 0.26288 0.68478
N'3+ N -0.21963 0.23837 0.54238
N'4+ N -0.13785 0.22784 0.52129
N5+ N -0.16255 0.26887 0.75915
C6+ C -0.01343 0.25121 0.69910
N7+ N 0.02230 0.07158 0.77715
O8+ O 0.09826 0.05261 0.77817
O9+ O -0.02899 -0.03163 0.82799
N10+ N 0.04142 0.27546 0.56259
O11+ O 0.04154 0.14420 0.47952
O12+ O 0.07894 0.41948 0.54819
N13+ N 0.00643 0.41289 0.81132
O14+ O -0.02303 0.55952 0.77429
O15+ O 0.05003 0.37925 0.92044
O16+ O -0.15206 0.29393 0.89829

```

#END

**S17.** Optimized crystal structure coordinates for 5 polymorphs of Aminoguanidinium 5-(trinitromethyl)tetrazolate 1*N*-oxide (ionic form).

```

data_2e_1
_symmetry_cell_setting      monoclinic
_symmetry_space_group_name_H-M 'P 21/a'
_symmetry_Int_Tables_number 14
loop_
_symmetry_equiv_pos_site_id
_symmetry_equiv_pos_as_xyz
1 x,y,z
2 1/2-x,1/2+y,-z
3 -x,-y,-z
4 1/2+x,1/2-y,z
_cell_length_a              8.011
_cell_length_b              22.680
_cell_length_c              6.281
_cell_angle_alpha           90.00
_cell_angle_beta            83.73
_cell_angle_gamma           90.00

```

```

_cell_volume          1134.37
loop_
_atom_site_label
_atom_site_type_symbol
_atom_site_fract_x
_atom_site_fract_y
_atom_site_fract_z
C1 C 0.21577 0.32451 0.02376
N2 N 0.15812 0.27195 -0.03258
H*3 H 0.07919 0.26831 -0.14685
H*4 H 0.19210 0.23443 0.03786
N5 N 0.16743 0.37348 -0.07404
H*6 H 0.08818 0.37013 -0.18895
N7 N 0.31962 0.32925 0.17416
H*8 H 0.35865 0.29355 0.25105
H*9 H 0.35949 0.37009 0.21069
N10 N 0.22807 0.42826 -0.01450
H*11 H 0.29531 0.44786 -0.14227
H*12 H 0.13103 0.45469 0.04435
C1+ C 0.17995 0.64311 0.45948
N'2+ N 0.11243 0.73160 0.57195
N'3+ N 0.04731 0.72051 0.38970
N'4+ N 0.08629 0.66687 0.31606
N5+ N 0.19770 0.68301 0.61809
C6+ C 0.26131 0.58586 0.45536
N7+ N 0.17449 0.53851 0.61719
O8+ O 0.21169 0.48710 0.57958
O9+ O 0.07799 0.55749 0.76307
N10+ N 0.26309 0.55640 0.23409
O11+ O 0.12553 0.54148 0.18865
O12+ O 0.39725 0.55068 0.12461
N13+ N 0.44838 0.59112 0.51147
O14+ O 0.52978 0.62942 0.41385
O15+ O 0.49533 0.55648 0.64001
O16+ O 0.28073 0.67651 0.77859

```

#END

```

data_2e_2
_symmetry_cell_setting      monoclinic
_symmetry_space_group_name_H-M 'P 21/a'
_symmetry_Int_Tables_number 14
loop_
_symmetry_equiv_pos_site_id
_symmetry_equiv_pos_as_xyz
1 x,y,z
2 1/2-x,1/2+y,-z
3 -x,-y,-z
4 1/2+x,1/2-y,z
_cell_length_a             11.253
_cell_length_b             10.291
_cell_length_c             10.427

```

```

_cell_angle_alpha      90.00
_cell_angle_beta      113.97
_cell_angle_gamma     90.00
_cell_volume          1103.36
loop_
_atom_site_label
_atom_site_type_symbol
_atom_site_fract_x
_atom_site_fract_y
_atom_site_fract_z
C1 C 0.40327 0.14854 0.35108
N2 N 0.32856 0.09576 0.40981
H*3 H 0.31198 -0.00095 0.40589
H*4 H 0.28668 0.15138 0.45975
N5 N 0.45733 0.07100 0.28547
H*6 H 0.44106 -0.02622 0.28116
N7 N 0.42504 0.27582 0.35630
H*8 H 0.38620 0.33706 0.40452
H*9 H 0.48234 0.31072 0.31013
N10 N 0.53528 0.12669 0.22432
H*11 H 0.62731 0.09041 0.26960
H*12 H 0.49645 0.10950 0.11904
C1+ C 0.85585 -0.18566 0.25933
N'2+ N 0.77634 -0.20951 0.41647
N'3+ N 0.80966 -0.32457 0.38246
N'4+ N 0.85836 -0.31376 0.28648
N5+ N 0.80447 -0.12026 0.33879
C6+ C 0.89352 -0.11886 0.15898
N7+ N 1.02709 -0.04204 0.22434
O8+ O 1.07726 -0.01462 0.14380
O9+ O 1.06801 -0.01811 0.34865
N10+ N 0.91245 -0.21506 0.05558
O11+ O 1.00556 -0.28691 0.10831
O12+ O 0.83516 -0.21248 -0.06679
N13+ N 0.78813 -0.01490 0.07201
O14+ O 0.67737 -0.05509 0.02398
O15+ O 0.82574 0.09265 0.05780
O16+ O 0.78454 0.00173 0.33910

```

#END

```

data_2e_3
_symmetry_cell_setting      monoclinic
_symmetry_space_group_name_H-M 'P 21/c'
_symmetry_Int_Tables_number 14
loop_
_symmetry_equiv_pos_site_id
_symmetry_equiv_pos_as_xyz
1 x,y,z
2 -x,1/2+y,1/2-z
3 -x,-y,-z
4 x,1/2-y,1/2+z

```

```

_cell_length_a      7.222
_cell_length_b      6.580
_cell_length_c      32.615
_cell_angle_alpha   90.00
_cell_angle_beta    46.09
_cell_angle_gamma   90.00
_cell_volume        1116.59
loop_
_atom_site_label
_atom_site_type_symbol
_atom_site_fract_x
_atom_site_fract_y
_atom_site_fract_z
C1 C 0.85820 0.08438 0.66586
N2 N 0.62335 0.13050 0.71598
H*3 H 0.46476 0.10823 0.72303
H*4 H 0.59842 0.18896 0.74817
N5 N 0.88318 0.00672 0.62404
H*6 H 0.72465 -0.01602 0.63084
N7 N 1.06678 0.11374 0.65663
H*8 H 1.05579 0.17164 0.68693
H*9 H 1.23991 0.07623 0.61792
N10 N 1.12898 -0.04117 0.57178
H*11 H 1.14110 -0.19235 0.56349
H*12 H 1.17004 0.04233 0.54001
C1+ C 0.26256 -0.12503 0.15577
N'2+ N 0.00476 -0.18169 0.24665
N'3+ N -0.12897 -0.12657 0.23415
N'4+ N 0.02233 -0.09032 0.17901
N5+ N 0.25385 -0.18061 0.19740
C6+ C 0.50484 -0.10198 0.09698
N7+ N 0.63947 -0.30756 0.06275
O8+ O 0.80231 -0.29366 0.01097
O9+ O 0.56761 -0.46051 0.09100
N10+ N 0.46953 0.01620 0.06201
O11+ O 0.34794 -0.07434 0.05460
O12+ O 0.56171 0.18583 0.04521
N13+ N 0.70967 0.01335 0.09274
O14+ O 0.63022 0.16747 0.12084
O15+ O 0.92540 -0.05685 0.06153
O16+ O 0.44373 -0.22133 0.19158

```

#END

```

data_2e_4
_symmetry_cell_setting      monoclinic
_symmetry_space_group_name_H-M 'P 21/c'
_symmetry_Int_Tables_number 14
loop_
_symmetry_equiv_pos_site_id
_symmetry_equiv_pos_as_xyz
1 x,y,z

```

2 -x,1/2+y,1/2-z  
 3 -x,-y,-z  
 4 x,1/2-y,1/2+z  
 \_cell\_length\_a 8.673  
 \_cell\_length\_b 10.444  
 \_cell\_length\_c 12.646  
 \_cell\_angle\_alpha 90.00  
 \_cell\_angle\_beta 102.51  
 \_cell\_angle\_gamma 90.00  
 \_cell\_volume 1118.29

loop\_  
 \_atom\_site\_label  
 \_atom\_site\_type\_symbol  
 \_atom\_site\_fract\_x  
 \_atom\_site\_fract\_y  
 \_atom\_site\_fract\_z  
 C1 C 0.24796 -0.26040 0.77079  
 N2 N 0.35510 -0.33792 0.74222  
 H\*3 H 0.41021 -0.31397 0.68236  
 H\*4 H 0.38377 -0.42265 0.77986  
 N5 N 0.21308 -0.14824 0.71859  
 H\*6 H 0.26801 -0.12361 0.65839  
 N7 N 0.17550 -0.29201 0.84958  
 H\*8 H 0.19851 -0.37526 0.89056  
 H\*9 H 0.09538 -0.22985 0.86797  
 N10 N 0.10106 -0.06767 0.74879  
 H\*11 H 0.15120 0.01786 0.77550  
 H\*12 H 0.00817 -0.05388 0.68509  
 C1+ C -0.37097 0.71289 0.02929  
 N'2+ N -0.43511 0.55394 0.12243  
 N'3+ N -0.55385 0.63737 0.09845  
 N'4+ N -0.51873 0.73588 0.04177  
 N5+ N -0.31773 0.60069 0.07955  
 C6+ C -0.27141 0.79154 -0.02311  
 N7+ N -0.25111 0.74229 -0.13797  
 O8+ O -0.20460 0.82092 -0.19527  
 O9+ O -0.28458 0.63121 -0.15903  
 N10+ N -0.33942 0.92758 -0.04551  
 O11+ O -0.46178 0.93288 -0.11385  
 O12+ O -0.26849 1.01645 0.00543  
 N13+ N -0.09830 0.80228 0.04859  
 O14+ O -0.09242 0.82878 0.14266  
 O15+ O 0.01160 0.78672 0.00445  
 O16+ O -0.18230 0.54961 0.08660

#END

data\_2e\_5  
 \_symmetry\_cell\_setting triclinic  
 \_symmetry\_space\_group\_name\_H-M 'P -1'  
 \_symmetry\_Int\_Tables\_number 2  
 loop\_

```

_symmetry_equiv_pos_site_id
_symmetry_equiv_pos_as_xyz
1 x,y,z
2 -x,-y,-z
_cell_length_a          12.003
_cell_length_b          7.189
_cell_length_c          6.752
_cell_angle_alpha       88.46
_cell_angle_beta        90.63
_cell_angle_gamma       82.09
_cell_volume            576.812
loop_
_atom_site_label
_atom_site_type_symbol
_atom_site_fract_x
_atom_site_fract_y
_atom_site_fract_z
C1 C 0.82819 -0.06486 0.16625
N2 N 0.92692 -0.01691 0.22595
H*3 H 0.93685 0.11870 0.24559
H*4 H 0.99429 -0.11533 0.25302
N5 N 0.74041 0.07063 0.13174
H*6 H 0.74983 0.20711 0.15118
N7 N 0.81520 -0.24337 0.14045
H*8 H 0.87903 -0.34884 0.16482
H*9 H 0.73869 -0.27194 0.09507
N10 N 0.63749 0.01968 0.06940
H*11 H 0.57671 0.06012 0.16959
H*12 H 0.61512 0.07898 -0.06647
C1+ C 0.18002 0.40472 0.32745
N'2+ N 0.00433 0.47233 0.23615
N'3+ N 0.02821 0.28992 0.28364
N'4+ N 0.13490 0.24347 0.33973
N5+ N 0.09992 0.54723 0.26226
C6+ C 0.29536 0.43522 0.36486
N7+ N 0.31656 0.53543 0.56560
O8+ O 0.41379 0.51884 0.62552
O9+ O 0.23428 0.61856 0.64252
N10+ N 0.37498 0.24787 0.38051
O11+ O 0.36096 0.15089 0.52603
O12+ O 0.44325 0.21171 0.25015
N13+ N 0.33855 0.56215 0.19529
O14+ O 0.31997 0.51407 0.02888
O15+ O 0.38785 0.69089 0.24388
O16+ O 0.11233 0.71861 0.22899

```

#END

**S18.** Optimized crystal structure coordinates for 5 polymorphs of Diaminoguanidinium 5-(trinitromethyl)tetrazolate 1*N*-oxide (ionic form).

data\_2f\_1

```

_symmetry_cell_setting      monoclinic
_symmetry_space_group_name_H-M 'P 21/a'
_symmetry_Int_Tables_number 14
loop_
_symmetry_equiv_pos_site_id
_symmetry_equiv_pos_as_xyz
1 x,y,z
2 1/2-x,1/2+y,-z
3 -x,-y,-z
4 1/2+x,1/2-y,z
_cell_length_a              18.469
_cell_length_b              10.272
_cell_length_c              6.400
_cell_angle_alpha           90.00
_cell_angle_beta            95.78
_cell_angle_gamma           90.00
_cell_volume                1207.99
loop_
_atom_site_label
_atom_site_type_symbol
_atom_site_fract_x
_atom_site_fract_y
_atom_site_fract_z
C1 C 0.42499 -0.37961 0.39266
N2 N 0.44999 -0.27955 0.51311
H*3 H 0.42011 -0.25099 0.63002
N4 N 0.36216 -0.43746 0.43088
H*5 H 0.34279 -0.51334 0.34046
N6 N 0.46188 -0.42127 0.23706
H*7 H 0.50887 -0.37484 0.21404
H*8 H 0.44427 -0.49646 0.14391
N9 N 0.32482 -0.39115 0.59568
N10 N 0.51535 -0.21979 0.47262
H*11 H 0.55247 -0.22738 0.60095
H*12 H 0.27443 -0.35902 0.53964
H*13 H 0.32068 -0.46244 0.70436
H*14 H 0.50632 -0.12421 0.43661
C1+ C 0.13127 0.67316 0.02296
N'2+ N 0.13191 0.86410 0.17052
N'3+ N 0.09421 0.86792 -0.01826
N'4+ N 0.09280 0.75302 -0.11319
N5+ N 0.15612 0.74128 0.19884
C6+ C 0.14947 0.53696 -0.00235
N7+ N 0.10539 0.43706 0.12520
O8+ O 0.10522 0.32406 0.06638
O9+ O 0.07535 0.48184 0.26889
N10+ N 0.13349 0.49318 -0.23266
O11+ O 0.06917 0.48966 -0.29577
O12+ O 0.18464 0.46686 -0.33117
N13+ N 0.23247 0.51018 0.07057
O14+ O 0.27413 0.58607 0.00080
O15+ O 0.24749 0.41666 0.18298

```

O16+ O 0.19561 0.69863 0.35924

#END

data\_2f\_2

```
_symmetry_cell_setting      monoclinic
_symmetry_space_group_name_H-M 'P 21/a'
_symmetry_Int_Tables_number 14
loop_
_symmetry_equiv_pos_site_id
_symmetry_equiv_pos_as_xyz
1 x,y,z
2 1/2-x,1/2+y,-z
3 -x,-y,-z
4 1/2+x,1/2-y,z
_cell_length_a              12.207
_cell_length_b              11.885
_cell_length_c              11.012
_cell_angle_alpha           90.00
_cell_angle_beta            50.92
_cell_angle_gamma           90.00
_cell_volume                1240.18
loop_
_atom_site_label
_atom_site_type_symbol
_atom_site_fract_x
_atom_site_fract_y
_atom_site_fract_z
C1 C -0.26117 0.23457 0.04876
N2 N -0.36597 0.29268 0.17410
H*3 H -0.41546 0.35211 0.15774
N4 N -0.22619 0.25697 -0.09184
H*5 H -0.14694 0.21338 -0.18747
N6 N -0.19252 0.15564 0.06320
H*7 H -0.22242 0.14164 0.17119
H*8 H -0.11315 0.11060 -0.02933
N9 N -0.30056 0.34047 -0.10272
N10 N -0.40187 0.26902 0.31998
H*11 H -0.50413 0.24302 0.39610
H*12 H -0.23396 0.40314 -0.17551
H*13 H -0.34984 0.30687 -0.14200
H*14 H -0.38853 0.33907 0.36267
C1+ C 0.18257 0.02032 0.52047
N'2+ N 0.02147 0.06133 0.76678
N'3+ N -0.00473 0.11436 0.68084
N'4+ N 0.09173 0.09146 0.52970
N5+ N 0.14039 0.00162 0.66673
C6+ C 0.31119 -0.02888 0.38253
N7+ N 0.30137 -0.15809 0.35433
O8+ O 0.39250 -0.19346 0.22231
O9+ O 0.20373 -0.21014 0.46603
N10+ N 0.35680 0.02933 0.23195
```

O11+ O 0.27850 0.01258 0.20106  
O12+ O 0.46372 0.08620 0.15807  
N13+ N 0.43634 -0.02009 0.38956  
O14+ O 0.45105 0.07243 0.42372  
O15+ O 0.50772 -0.10346 0.35736  
O16+ O 0.20181 -0.05919 0.70328

#END

data\_2f\_3

\_symmetry\_cell\_setting triclinic  
\_symmetry\_space\_group\_name\_H-M 'P -1'  
\_symmetry\_Int\_Tables\_number 2  
loop\_  
\_symmetry\_equiv\_pos\_site\_id  
\_symmetry\_equiv\_pos\_as\_xyz  
1 x,y,z  
2 -x,-y,-z  
\_cell\_length\_a 10.774  
\_cell\_length\_b 6.507  
\_cell\_length\_c 9.629  
\_cell\_angle\_alpha 81.56  
\_cell\_angle\_beta 67.62  
\_cell\_angle\_gamma 85.56  
\_cell\_volume 617.278  
loop\_  
\_atom\_site\_label  
\_atom\_site\_type\_symbol  
\_atom\_site\_fract\_x  
\_atom\_site\_fract\_y  
\_atom\_site\_fract\_z  
C1 C 0.35580 -0.09564 -0.34799  
N2 N 0.25781 0.02394 -0.37326  
H\*3 H 0.21807 0.14008 -0.30802  
N4 N 0.39707 -0.05760 -0.23868  
H\*5 H 0.47125 -0.14736 -0.21870  
N6 N 0.41164 -0.25022 -0.43004  
H\*7 H 0.37742 -0.27314 -0.51104  
H\*8 H 0.48565 -0.34270 -0.41336  
N9 N 0.33617 0.10612 -0.15463  
N10 N 0.21532 -0.01637 -0.48706  
H\*11 H 0.23024 0.11029 -0.56696  
H\*12 H 0.29105 0.05127 -0.04293  
H\*13 H 0.40540 0.21332 -0.16884  
H\*14 H 0.11616 -0.05138 -0.44134  
C1+ C -0.25124 0.47556 0.75855  
N'2+ N -0.42404 0.34570 0.74087  
N'3+ N -0.39976 0.53433 0.66202  
N'4+ N -0.29502 0.61860 0.67050  
N5+ N -0.33104 0.30630 0.80348  
C6+ C -0.14201 0.48830 0.80995  
N7+ N -0.01040 0.35690 0.72892

O8+ O 0.09229 0.40564 0.73986  
O9+ O -0.02318 0.22065 0.66242  
N10+ N -0.09318 0.71272 0.78082  
O11+ O -0.03707 0.77840 0.64778  
O12+ O -0.11421 0.80472 0.88931  
N13+ N -0.18585 0.40938 0.98479  
O14+ O -0.29215 0.48197 1.06333  
O15+ O -0.11025 0.29001 1.02556  
O16+ O -0.32178 0.14235 0.88993

#END

data\_2f\_4  
\_symmetry\_cell\_setting triclinic  
\_symmetry\_space\_group\_name\_H-M 'P -1'  
\_symmetry\_Int\_Tables\_number 2  
loop\_  
\_symmetry\_equiv\_pos\_site\_id  
\_symmetry\_equiv\_pos\_as\_xyz  
1 x,y,z  
2 -x,-y,-z  
\_cell\_length\_a 7.653  
\_cell\_length\_b 8.461  
\_cell\_length\_c 9.849  
\_cell\_angle\_alpha 101.31  
\_cell\_angle\_beta 86.14  
\_cell\_angle\_gamma 76.62  
\_cell\_volume 604.123  
loop\_  
\_atom\_site\_label  
\_atom\_site\_type\_symbol  
\_atom\_site\_fract\_x  
\_atom\_site\_fract\_y  
\_atom\_site\_fract\_z  
C1 C -0.03614 0.26200 0.81461  
N2 N -0.05317 0.22203 0.67858  
H\*3 H 0.05278 0.21974 0.60955  
N4 N 0.11852 0.29704 0.85376  
H\*5 H 0.13267 0.32745 0.95658  
N6 N -0.17065 0.26699 0.90985  
H\*7 H -0.28450 0.23972 0.87563  
H\*8 H -0.16139 0.29674 1.01303  
N9 N 0.25707 0.29059 0.75088  
N10 N -0.21431 0.18573 0.63851  
H\*11 H -0.18781 0.06734 0.58046  
H\*12 H 0.28418 0.40422 0.75995  
H\*13 H 0.37060 0.20363 0.75851  
H\*14 H -0.27404 0.26746 0.58191  
C1+ C 0.19755 0.27524 0.23476  
N'2+ N -0.07178 0.25396 0.30035  
N'3+ N -0.07485 0.32400 0.19026  
N'4+ N 0.08732 0.33930 0.14751

N5+ N 0.10001 0.22287 0.33040  
C6+ C 0.38896 0.26506 0.23935  
N7+ N 0.51984 0.08529 0.18238  
O8+ O 0.67840 0.07998 0.15102  
O9+ O 0.45070 -0.03087 0.17410  
N10+ N 0.45515 0.37354 0.14858  
O11+ O 0.45612 0.32398 0.02391  
O12+ O 0.49923 0.49690 0.20641  
N13+ N 0.43143 0.32266 0.39356  
O14+ O 0.33193 0.45315 0.45738  
O15+ O 0.55921 0.23631 0.43336  
O16+ O 0.15797 0.15877 0.43081

#END

data\_2f\_5  
\_symmetry\_cell\_setting monoclinic  
\_symmetry\_space\_group\_name\_H-M 'P 21/c'  
\_symmetry\_Int\_Tables\_number 14  
loop\_  
\_symmetry\_equiv\_pos\_site\_id  
\_symmetry\_equiv\_pos\_as\_xyz  
1 x,y,z  
2 -x,1/2+y,1/2-z  
3 -x,-y,-z  
4 x,1/2-y,1/2+z  
\_cell\_length\_a 7.220  
\_cell\_length\_b 10.129  
\_cell\_length\_c 18.178  
\_cell\_angle\_alpha 90.00  
\_cell\_angle\_beta 78.51  
\_cell\_angle\_gamma 90.00  
\_cell\_volume 1302.74  
loop\_  
\_atom\_site\_label  
\_atom\_site\_type\_symbol  
\_atom\_site\_fract\_x  
\_atom\_site\_fract\_y  
\_atom\_site\_fract\_z  
C1 C 0.52993 0.30219 0.63892  
N2 N 0.41676 0.39459 0.67673  
H\*3 H 0.29952 0.42029 0.65701  
N4 N 0.48435 0.24790 0.57719  
H\*5 H 0.56923 0.17783 0.54818  
N6 N 0.68557 0.26458 0.66215  
H\*7 H 0.71427 0.30809 0.70886  
H\*8 H 0.77333 0.19517 0.63472  
N9 N 0.31974 0.28978 0.55439  
N10 N 0.46488 0.45068 0.74086  
H\*11 H 0.36062 0.43291 0.78644  
H\*12 H 0.35218 0.32989 0.50204  
H\*13 H 0.22891 0.21271 0.55506

H\*14 H 0.48360 0.54982 0.73355  
 C1+ C 1.00888 0.35459 -0.10985  
 N'2+ N 0.90809 0.55303 -0.07806  
 N'3+ N 1.08926 0.55633 -0.11239  
 N'4+ N 1.15570 0.43680 -0.13247  
 N5+ N 0.85501 0.42561 -0.07566  
 C6+ C 1.00307 0.21169 -0.11506  
 N7+ N 0.89851 0.15532 -0.17729  
 O8+ O 0.93338 0.04099 -0.19623  
 O9+ O 0.79420 0.23097 -0.20092  
 N10+ N 1.20350 0.15281 -0.13567  
 O11+ O 1.28698 0.17811 -0.19902  
 O12+ O 1.26170 0.08813 -0.08854  
 N13+ N 0.89826 0.14821 -0.03859  
 O14+ O 0.95049 0.18955 0.01644  
 O15+ O 0.78076 0.06335 -0.04120  
 O16+ O 0.69205 0.38107 -0.04590

#END

**S19.** Optimized crystal structure coordinates for 5 polymorphs of Triaminoguanidinium 5-(trinitromethyl)tetrazolate 1*N*-oxide (ionic form).

```

data_2g_1
_symmetry_cell_setting      monoclinic
_symmetry_space_group_name_H-M 'C 2/c'
_symmetry_Int_Tables_number 15
loop_
_symmetry_equiv_pos_site_id
_symmetry_equiv_pos_as_xyz
1 x,y,z
2 -x,y,1/2-z
3 -x,-y,-z
4 x,-y,1/2+z
5 1/2+x,1/2+y,z
6 1/2-x,1/2+y,1/2-z
7 1/2-x,1/2-y,-z
8 1/2+x,1/2-y,1/2+z
_cell_length_a              22.992
_cell_length_b              7.338
_cell_length_c              17.863
_cell_angle_alpha           90.00
_cell_angle_beta            123.12
_cell_angle_gamma           90.00
_cell_volume                2524.11
loop_
_atom_site_label
_atom_site_type_symbol
_atom_site_fract_x
_atom_site_fract_y
_atom_site_fract_z
C1 C 0.41164 0.64966 0.68288
  
```

N2 N 0.40052 0.75959 0.73380  
 H\*3 H 0.39271 0.70020 0.77902  
 N4 N 0.42223 0.72098 0.62218  
 H\*5 H 0.42144 0.85900 0.61683  
 N6 N 0.41216 0.46841 0.69266  
 H\*7 H 0.42077 0.38978 0.65279  
 N8 N 0.43373 0.60315 0.56979  
 N9 N 0.40023 0.94856 0.72227  
 H\*10 H 0.43825 1.00787 0.78027  
 H\*11 H 0.39619 0.62125 0.50393  
 H\*12 H 0.48123 0.62804 0.58029  
 H\*13 H 0.35321 1.00109 0.70390  
 N14 N 0.40096 0.39727 0.75657  
 H\*15 H 0.35796 0.31646 0.72626  
 H\*16 H 0.44300 0.32325 0.80263  
 C1+ C 0.10433 0.34337 0.51027  
 N'2+ N -0.00657 0.29231 0.44288  
 N'3+ N 0.00743 0.36660 0.38633  
 N'4+ N 0.07468 0.40002 0.42525  
 N5+ N 0.05435 0.27734 0.52201  
 C6+ C 0.17667 0.35305 0.58369  
 N7+ N 0.21764 0.16556 0.61081  
 O8+ O 0.28087 0.17599 0.65458  
 O9+ O 0.18256 0.02852 0.58517  
 N10+ N 0.21864 0.47825 0.56078  
 O11+ O 0.22595 0.41945 0.50277  
 O12+ O 0.24033 0.62207 0.60076  
 N13+ N 0.18410 0.42642 0.67174  
 O14+ O 0.15067 0.56271 0.66122  
 O15+ O 0.22286 0.34546 0.74116  
 O16+ O 0.06276 0.21536 0.59402

#END

data\_2g\_2  
 \_symmetry\_cell\_setting orthorhombic  
 \_symmetry\_space\_group\_name\_H-M 'P 21 21 21'  
 \_symmetry\_Int\_Tables\_number 19  
 loop\_  
 \_symmetry\_equiv\_pos\_site\_id  
 \_symmetry\_equiv\_pos\_as\_xyz  
 1 x,y,z  
 2 1/2+x,1/2-y,-z  
 3 -x,1/2+y,1/2-z  
 4 1/2-x,-y,1/2+z  
 \_cell\_length\_a 12.404  
 \_cell\_length\_b 10.902  
 \_cell\_length\_c 10.061  
 \_cell\_angle\_alpha 90.00  
 \_cell\_angle\_beta 90.00  
 \_cell\_angle\_gamma 90.00  
 \_cell\_volume 1360.53

```

loop_
  _atom_site_label
  _atom_site_type_symbol
  _atom_site_fract_x
  _atom_site_fract_y
  _atom_site_fract_z
C1 C 0.36666 0.08795 0.61449
N2 N 0.36047 0.18019 0.52670
H*3 H 0.28748 0.22088 0.51370
N4 N 0.46100 0.03114 0.63541
H*5 H 0.52593 0.06074 0.58275
N6 N 0.27851 0.05251 0.68135
H*7 H 0.28657 -0.01776 0.74701
N8 N 0.46535 -0.06501 0.72769
N9 N 0.45375 0.21549 0.45809
H*10 H 0.47145 0.30474 0.47852
H*11 H 0.48918 -0.14372 0.68177
H*12 H 0.51810 -0.04391 0.80182
H*13 H 0.44254 0.20493 0.35847
N14 N 0.18087 0.11337 0.65769
H*15 H 0.12489 0.05292 0.62316
H*16 H 0.15380 0.15273 0.74321
C1+ C 0.13595 0.35292 -0.05245
N'2+ N -0.00732 0.44298 -0.13038
N'3+ N 0.01107 0.33876 -0.19584
N'4+ N 0.09811 0.28140 -0.15107
N5+ N 0.07150 0.45367 -0.03935
C6+ C 0.23182 0.33669 0.02842
N7+ N 0.21093 0.29313 0.17663
O8+ O 0.28786 0.24854 0.23477
O9+ O 0.12028 0.30716 0.21880
N10+ N 0.30631 0.23718 -0.02984
O11+ O 0.27000 0.13370 -0.02408
O12+ O 0.39272 0.26849 -0.07623
N13+ N 0.29784 0.46024 0.04037
O14+ O 0.31317 0.51204 -0.06450
O15+ O 0.32926 0.49085 0.14988
O16+ O 0.08346 0.54257 0.04175

```

#END

```

data_2g_3
  _symmetry_cell_setting      monoclinic
  _symmetry_space_group_name_H-M 'P 21/c'
  _symmetry_Int_Tables_number 14
loop_
  _symmetry_equiv_pos_site_id
  _symmetry_equiv_pos_as_xyz
1 x,y,z
2 -x,1/2+y,1/2-z
3 -x,-y,-z
4 x,1/2-y,1/2+z

```

\_cell\_length\_a 12.918  
\_cell\_length\_b 11.358  
\_cell\_length\_c 8.750  
\_cell\_angle\_alpha 90.00  
\_cell\_angle\_beta 87.99  
\_cell\_angle\_gamma 90.00  
\_cell\_volume 1283.03

loop\_

\_atom\_site\_label  
\_atom\_site\_type\_symbol  
\_atom\_site\_fract\_x  
\_atom\_site\_fract\_y  
\_atom\_site\_fract\_z  
C1 C 0.78331 0.13891 0.10532  
N2 N 0.70556 0.21429 0.08217  
H\*3 H 0.72226 0.30175 0.08273  
N4 N 0.76548 0.02263 0.10569  
H\*5 H 0.69197 -0.00482 0.08801  
N6 N 0.87889 0.17980 0.12810  
H\*7 H 0.93571 0.11980 0.14522  
N8 N 0.84806 -0.05432 0.13015  
N9 N 0.60636 0.16933 0.05864  
H\*10 H 0.58211 0.19459 -0.04589  
H\*11 H 0.83277 -0.10356 0.22555  
H\*12 H 0.85913 -0.10826 0.03805  
H\*13 H 0.55575 0.19929 0.14162  
N14 N 0.89551 0.30172 0.12717  
H\*15 H 0.92187 0.32805 0.23004  
H\*16 H 0.94823 0.32335 0.04254  
C1+ C 0.21470 0.39881 -0.16245  
N'2+ N 0.05343 0.35894 -0.10337  
N'3+ N 0.06273 0.39748 -0.24707  
N'4+ N 0.16019 0.42293 -0.28700  
N5+ N 0.14914 0.35973 -0.04768  
C6+ C 0.32467 0.41420 -0.13982  
N7+ N 0.39113 0.29675 -0.14138  
O8+ O 0.48441 0.30830 -0.16287  
O9+ O 0.34339 0.20583 -0.12216  
N10+ N 0.37571 0.48979 -0.26780  
O11+ O 0.37980 0.44282 -0.39276  
O12+ O 0.40665 0.58768 -0.23561  
N13+ N 0.34466 0.47472 0.01915  
O14+ O 0.29255 0.56162 0.04507  
O15+ O 0.41044 0.43229 0.09844  
O16+ O 0.17261 0.33081 0.08763

#END

data\_2g\_4

\_symmetry\_cell\_setting triclinic  
\_symmetry\_space\_group\_name\_H-M 'P -1'  
\_symmetry\_Int\_Tables\_number 2

```

loop_
_symmetry_equiv_pos_site_id
_symmetry_equiv_pos_as_xyz
1 x,y,z
2 -x,-y,-z
_cell_length_a          12.413
_cell_length_b          6.136
_cell_length_c          8.870
_cell_angle_alpha       75.36
_cell_angle_beta        84.37
_cell_angle_gamma       91.30
_cell_volume            649.715

```

```

loop_
_atom_site_label
_atom_site_type_symbol
_atom_site_fract_x
_atom_site_fract_y
_atom_site_fract_z
C1 C 0.74038 -0.04861 0.77237
N2 N 0.81546 -0.16992 0.71634
H*3 H 0.79594 -0.24330 0.63129
N4 N 0.76197 0.05171 0.88464
H*5 H 0.83618 0.03173 0.92415
N6 N 0.64372 -0.02762 0.71612
H*7 H 0.58902 0.06575 0.76167
N8 N 0.68213 0.17757 0.94123
N9 N 0.91585 -0.18928 0.77708
H*10 H 0.97639 -0.12437 0.68999
H*11 H 0.66181 0.11075 1.05820
H*12 H 0.71003 0.34073 0.92171
H*13 H 0.92817 -0.35435 0.82648
N14 N 0.62316 -0.13412 0.59880
H*15 H 0.55883 -0.24720 0.63716
H*16 H 0.60705 -0.01722 0.50067
C1+ C -0.30375 0.64966 0.27837
N'2+ N -0.47371 0.53730 0.30493
N'3+ N -0.46351 0.76170 0.25897
N'4+ N -0.36077 0.83635 0.24186
N5+ N -0.37307 0.46342 0.31851
C6+ C -0.18780 0.63163 0.28493
N7+ N -0.12430 0.55420 0.14476
O8+ O -0.02644 0.59380 0.12465
O9+ O -0.17860 0.46395 0.06932
N10+ N -0.13193 0.86093 0.27895
O11+ O -0.13132 1.00043 0.15405
O12+ O -0.09432 0.88491 0.39582
N13+ N -0.16222 0.45526 0.43932
O14+ O -0.21202 0.47844 0.55831
O15+ O -0.09481 0.31842 0.42714
O16+ O -0.34863 0.25792 0.36283

```

```
#END
```

```

data_2g_5
_symmetry_cell_setting      monoclinic
_symmetry_space_group_name_H-M 'P 21/c'
_symmetry_Int_Tables_number 14
loop_
_symmetry_equiv_pos_site_id
_symmetry_equiv_pos_as_xyz
1 x,y,z
2 -x,1/2+y,1/2-z
3 -x,-y,-z
4 x,1/2-y,1/2+z
_cell_length_a              8.257
_cell_length_b              9.721
_cell_length_c              16.075
_cell_angle_alpha           90.00
_cell_angle_beta            96.90
_cell_angle_gamma           90.00
_cell_volume                 1280.94
loop_
_atom_site_label
_atom_site_type_symbol
_atom_site_fract_x
_atom_site_fract_y
_atom_site_fract_z
C1 C 0.29291 -0.05422 0.50088
N2 N 0.26712 -0.01631 0.42019
H*3 H 0.22326 0.08001 0.40721
N4 N 0.35065 -0.18014 0.52144
H*5 H 0.37332 -0.24380 0.47402
N6 N 0.26096 0.03379 0.56101
H*7 H 0.28215 0.00113 0.62141
N8 N 0.37656 -0.21728 0.60623
N9 N 0.30148 -0.11020 0.35853
H*10 H 0.38818 -0.07076 0.32527
H*11 H 0.30645 -0.30024 0.61667
H*12 H 0.49641 -0.24038 0.62278
H*13 H 0.19822 -0.13062 0.31917
N14 N 0.20068 0.16481 0.53789
H*15 H 0.08912 0.17841 0.55764
H*16 H 0.27908 0.23827 0.56375
C1+ C 0.63136 0.03858 0.14541
N'2+ N 0.38899 0.05323 0.18501
N'3+ N 0.39238 0.11650 0.11168
N'4+ N 0.53865 0.10986 0.08563
N5+ N 0.53995 0.00369 0.20753
C6+ C 0.80352 0.00468 0.15077
N7+ N 0.84337 -0.15078 0.13119
O8+ O 0.98056 -0.17399 0.11376
O9+ O 0.73380 -0.23267 0.13470
N10+ N 0.88876 0.08771 0.08692
O11+ O 0.84704 0.05702 0.01416

```

O12+ O 0.98750 0.17523 0.11310  
N13+ N 0.89366 0.03388 0.24147  
O14+ O 0.86486 0.14578 0.26947  
O15+ O 0.98489 -0.05407 0.27398  
O16+ O 0.58726 -0.06154 0.27492

#END

**S20.** Optimized crystal structure coordinates for 5 polymorphs of Ammonium 6-amino-3-(1-hydroxy-1*H*-tetrazolate-5-yl)-1,2,4,5-tetrazine 1,5-dioxide (ionic form).

```
data_3a_1
_symmetry_cell_setting      monoclinic
_symmetry_space_group_name_H-M 'P 21'
_symmetry_Int_Tables_number 4
loop_
_symmetry_equiv_pos_site_id
_symmetry_equiv_pos_as_xyz
1 x,y,z
2 -x,1/2+y,-z
_cell_length_a              6.127
_cell_length_b              13.165
_cell_length_c              5.713
_cell_angle_alpha           90.00
_cell_angle_beta            67.05
_cell_angle_gamma           90.00
_cell_volume                 424.346
loop_
_atom_site_label
_atom_site_type_symbol
_atom_site_fract_x
_atom_site_fract_y
_atom_site_fract_z
N1 N 0.24124 -0.20226 -0.07503
H*2 H 0.38789 -0.23870 -0.07049
H*3 H 0.09677 -0.21812 0.08872
H*4 H 0.27070 -0.12522 -0.08880
H*5 H 0.20959 -0.22700 -0.22955
C1+ C -0.24335 0.57285 0.14362
N'2+ N -0.34327 0.50519 0.03652
C3+ C -0.10932 0.54659 0.29364
C4+ C 0.12748 0.49331 0.57380
N'5+ N -0.44904 0.55955 -0.08319
N'6+ N -0.42371 0.65897 -0.05719
N7+ N -0.29378 0.66947 0.08515
N'8+ N 0.01279 0.62062 0.35439
N9+ N 0.13018 0.59126 0.49535
N10+ N 0.00684 0.42251 0.49643
N'11+ N -0.11592 0.44695 0.35850
O12+ O -0.23848 0.75499 0.14936
O13+ O 0.01554 0.33114 0.56266
O14+ O 0.25206 0.65464 0.56006
```

N15+ N 0.24067 0.46675 0.72768  
H\*16+ H 0.27242 0.39127 0.72914  
H\*17+ H 0.36465 0.51757 0.72825

#END

data\_3a\_2  
\_symmetry\_cell\_setting orthorhombic  
\_symmetry\_space\_group\_name\_H-M 'P b c a'  
\_symmetry\_Int\_Tables\_number 61  
loop\_  
\_symmetry\_equiv\_pos\_site\_id  
\_symmetry\_equiv\_pos\_as\_xyz  
1 x,y,z  
2 1/2-x,1/2+y,z  
3 x,1/2-y,1/2+z  
4 1/2-x,-y,1/2+z  
5 -x,-y,-z  
6 1/2+x,1/2-y,-z  
7 -x,1/2+y,1/2-z  
8 1/2+x,y,1/2-z  
\_cell\_length\_a 9.935  
\_cell\_length\_b 13.316  
\_cell\_length\_c 12.329  
\_cell\_angle\_alpha 90.00  
\_cell\_angle\_beta 90.00  
\_cell\_angle\_gamma 90.00  
\_cell\_volume 1631.06  
loop\_  
\_atom\_site\_label  
\_atom\_site\_type\_symbol  
\_atom\_site\_fract\_x  
\_atom\_site\_fract\_y  
\_atom\_site\_fract\_z  
N1 N 0.07766 0.40846 0.83381  
H\*2 H -0.01030 0.43715 0.86488  
H\*3 H 0.08539 0.33377 0.85390  
H\*4 H 0.07744 0.41591 0.75083  
H\*5 H 0.15812 0.44702 0.86563  
C1+ C -0.04443 0.86264 0.11993  
N'2+ N -0.14695 0.79570 0.11579  
C3+ C 0.09645 0.83684 0.12062  
C4+ C 0.35259 0.78427 0.12536  
N'5+ N -0.25886 0.84929 0.11677  
N'6+ N -0.23365 0.94751 0.12209  
N7+ N -0.09865 0.95802 0.12395  
N'8+ N 0.18825 0.91092 0.10714  
N9+ N 0.31623 0.88193 0.10986  
N10+ N 0.25360 0.71359 0.13434  
N'11+ N 0.12432 0.73761 0.13359  
O12+ O -0.03968 1.04247 0.13018  
O13+ O 0.29000 0.62273 0.14395

O14+ O 0.40983 0.94544 0.09687  
N15+ N 0.48458 0.75782 0.13269  
H\*16+ H 0.50186 0.68373 0.12025  
H\*17+ H 0.54865 0.80972 0.10193

#END

data\_3a\_3  
\_symmetry\_cell\_setting monoclinic  
\_symmetry\_space\_group\_name\_H-M 'C c'  
\_symmetry\_Int\_Tables\_number 9  
loop\_  
\_symmetry\_equiv\_pos\_site\_id  
\_symmetry\_equiv\_pos\_as\_xyz  
1 x,y,z  
2 x,-y,1/2+z  
3 1/2+x,1/2+y,z  
4 1/2+x,1/2-y,1/2+z  
\_cell\_length\_a 6.641  
\_cell\_length\_b 9.842  
\_cell\_length\_c 14.176  
\_cell\_angle\_alpha 90.00  
\_cell\_angle\_beta 69.38  
\_cell\_angle\_gamma 90.00  
\_cell\_volume 867.195  
loop\_  
\_atom\_site\_label  
\_atom\_site\_type\_symbol  
\_atom\_site\_fract\_x  
\_atom\_site\_fract\_y  
\_atom\_site\_fract\_z  
N1 N -0.12639 -0.41633 0.58091  
H\*2 H -0.26919 -0.40690 0.56851  
H\*3 H -0.02385 -0.33955 0.54415  
H\*4 H -0.15494 -0.41024 0.65691  
H\*5 H -0.05757 -0.50863 0.55408  
C1+ C -0.29372 0.45260 0.35206  
N'2+ N -0.24246 0.34843 0.28535  
C3+ C -0.26291 0.59443 0.32559  
C4+ C -0.19539 0.85212 0.27210  
N'5+ N -0.29516 0.23614 0.33958  
N'6+ N -0.37653 0.26265 0.43805  
N7+ N -0.37781 0.39895 0.44801  
N'8+ N -0.35267 0.68836 0.39798  
N9+ N -0.31576 0.81708 0.36856  
N10+ N -0.11711 0.75110 0.20276  
N'11+ N -0.14591 0.62095 0.22739  
O12+ O -0.44339 0.45933 0.53262  
O13+ O -0.01360 0.78643 0.11259  
O14+ O -0.39470 0.91269 0.43043  
N15+ N -0.15247 0.98478 0.24560  
H\*16+ H -0.10472 1.00165 0.17040

H\*17+ H -0.25340 1.05095 0.29450

#END

data\_3a\_4

\_symmetry\_cell\_setting monoclinic  
\_symmetry\_space\_group\_name\_H-M 'P 21/c'  
\_symmetry\_Int\_Tables\_number 14

loop\_

\_symmetry\_equiv\_pos\_site\_id

\_symmetry\_equiv\_pos\_as\_xyz

1 x,y,z

2 -x,1/2+y,1/2-z

3 -x,-y,-z

4 x,1/2-y,1/2+z

\_cell\_length\_a 9.874

\_cell\_length\_b 12.920

\_cell\_length\_c 7.394

\_cell\_angle\_alpha 90.00

\_cell\_angle\_beta 116.68

\_cell\_angle\_gamma 90.00

\_cell\_volume 842.836

loop\_

\_atom\_site\_label

\_atom\_site\_type\_symbol

\_atom\_site\_fract\_x

\_atom\_site\_fract\_y

\_atom\_site\_fract\_z

N1 N 0.29786 -0.02434 -0.36378

H\*2 H 0.21140 -0.06343 -0.35228

H\*3 H 0.34785 0.02580 -0.24387

H\*4 H 0.37715 -0.07642 -0.36195

H\*5 H 0.25504 0.01670 -0.49702

C1+ C -0.33121 0.72234 -0.35794

N'2+ N -0.43503 0.65255 -0.36238

C3+ C -0.18595 0.69676 -0.34796

C4+ C 0.08049 0.64460 -0.32272

N'5+ N -0.55107 0.70700 -0.37116

N'6+ N -0.52685 0.80852 -0.37119

N7+ N -0.38860 0.82034 -0.36332

N'8+ N -0.10382 0.77289 -0.37757

N9+ N 0.02965 0.74404 -0.36399

N10+ N -0.01179 0.57168 -0.30218

N'11+ N -0.14518 0.59551 -0.31158

O12+ O -0.32878 0.90796 -0.35873

O13+ O 0.03528 0.47893 -0.27262

O14+ O 0.11440 0.80934 -0.39143

N15+ N 0.22064 0.61865 -0.30067

H\*16+ H 0.23439 0.54186 -0.31486

H\*17+ H 0.26532 0.67086 -0.36112

#END

```

data_3a_5
_symmetry_cell_setting      orthorhombic
_symmetry_space_group_name_H-M 'P n a 21'
_symmetry_Int_Tables_number  33
loop_
_symmetry_equiv_pos_site_id
_symmetry_equiv_pos_as_xyz
1 x,y,z
2 1/2-x,1/2+y,1/2+z
3 1/2+x,1/2-y,z
4 -x,-y,1/2+z
_cell_length_a              9.851
_cell_length_b              6.632
_cell_length_c              13.349
_cell_angle_alpha           90.00
_cell_angle_beta            90.00
_cell_angle_gamma           90.00
_cell_volume                 872.115
loop_
_atom_site_label
_atom_site_type_symbol
_atom_site_fract_x
_atom_site_fract_y
_atom_site_fract_z
N1 N 0.33710 0.38811 0.20000
H*2 H 0.34438 0.42034 0.12488
H*3 H 0.34195 0.23469 0.21032
H*4 H 0.41578 0.45604 0.23765
H*5 H 0.24629 0.44137 0.22715
C1+ C 0.20432 -0.00826 0.43196
N'2+ N 0.10188 -0.04215 0.49751
C3+ C 0.34625 -0.00058 0.45786
C4+ C 0.60407 0.01834 0.51097
N'5+ N -0.01119 -0.03708 0.44436
N'6+ N 0.01312 -0.00020 0.34784
N7+ N 0.14880 0.01826 0.33793
N'8+ N 0.43919 0.00171 0.38318
N9+ N 0.56800 0.01112 0.41245
N10+ N 0.50421 0.00797 0.58175
N'11+ N 0.37397 0.00081 0.55762
O12+ O 0.20712 0.05644 0.25520
O13+ O 0.54071 0.00607 0.67285
O14+ O 0.66279 0.01181 0.34829
N15+ N 0.73654 0.03727 0.53827
H*16+ H 0.75538 -0.00276 0.61018
H*17+ H 0.80304 -0.00040 0.48347

#END

```

**S21.** Optimized crystal structure coordinates for 5 polymorphs of Hydroxylammonium 6-amino-3-(1-hydroxy-1*H*-tetrazolate-5-yl)-1,2,4,5-tetrazine 1,5-dioxide (ionic form).

```

data_3b_1
_symmetry_cell_setting      monoclinic
_symmetry_space_group_name_H-M 'P 21/a'
_symmetry_Int_Tables_number 14
loop_
_symmetry_equiv_pos_site_id
_symmetry_equiv_pos_as_xyz
1 x,y,z
2 1/2-x,1/2+y,-z
3 -x,-y,-z
4 1/2+x,1/2-y,z
_cell_length_a              19.339
_cell_length_b              14.758
_cell_length_c              5.312
_cell_angle_alpha           90.00
_cell_angle_beta            142.95
_cell_angle_gamma           90.00
_cell_volume                 913.451
loop_
_atom_site_label
_atom_site_type_symbol
_atom_site_fract_x
_atom_site_fract_y
_atom_site_fract_z
N1 N 0.31631 0.04899 0.20803
H*2 H 0.34653 0.09757 0.17323
H*3 H 0.27379 0.08075 0.23054
H*4 H 0.26170 0.00615 -0.04707
O5 O 0.41521 0.00360 0.57951
H*6 H 0.39021 -0.04333 0.62431
C1+ C -0.16634 -0.30807 0.68870
N'2+ N -0.17074 -0.39950 0.69576
C3+ C -0.10432 -0.25908 0.67766
C4+ C 0.01426 -0.17352 0.67178
N'5+ N -0.23562 -0.41687 0.70540
N'6+ N -0.27268 -0.34115 0.70786
N7+ N -0.23024 -0.27128 0.69657
N'8+ N -0.12214 -0.16881 0.60312
N9+ N -0.06119 -0.12781 0.60195
N10+ N 0.02407 -0.26514 0.72940
N'11+ N -0.03311 -0.30988 0.73906
O12+ O -0.24792 -0.18871 0.70037
O13+ O 0.09108 -0.30669 0.77556
O14+ O -0.07257 -0.04354 0.53067
N15+ N 0.07918 -0.12880 0.68749
H*16+ H 0.11243 -0.16938 0.64865
H*17+ H 0.04859 -0.06664 0.55329

#END

```

```

data_3b_2

```

```

_symmetry_cell_setting      triclinic
_symmetry_space_group_name_H-M 'P -1'
_symmetry_Int_Tables_number 2
loop_
_symmetry_equiv_pos_site_id
_symmetry_equiv_pos_as_xyz
1 x,y,z
2 -x,-y,-z
_cell_length_a              7.531
_cell_length_b              8.379
_cell_length_c              10.616
_cell_angle_alpha           110.26
_cell_angle_beta            89.79
_cell_angle_gamma           47.80
_cell_volume                 437.827
loop_
_atom_site_label
_atom_site_type_symbol
_atom_site_fract_x
_atom_site_fract_y
_atom_site_fract_z
N1 N -0.14840 0.17599 -0.23153
H*2 H -0.18645 0.32992 -0.17840
H*3 H 0.03414 0.02627 -0.24119
H*4 H -0.28058 0.19781 -0.17434
O5 O -0.17158 0.16293 -0.36521
H*6 H -0.13675 0.01854 -0.41931
C1+ C -0.21097 0.68263 0.94152
N'2+ N -0.33248 0.62214 0.96141
C3+ C -0.04212 0.58021 0.80648
C4+ C 0.27180 0.37923 0.55669
N'5+ N -0.46689 0.75542 1.09896
N'6+ N -0.43676 0.89775 1.16903
N7+ N -0.27606 0.85557 1.07178
N'8+ N 0.03368 0.68469 0.79720
N9+ N 0.19144 0.57924 0.67002
N10+ N 0.17896 0.29044 0.57364
N'11+ N 0.02378 0.38517 0.69785
O12+ O -0.20339 0.95973 1.10282
O13+ O 0.24788 0.11087 0.46499
O14+ O 0.27125 0.66483 0.64989
N15+ N 0.44253 0.26900 0.42978
H*16+ H 0.44680 0.15974 0.34601
H*17+ H 0.45605 0.37592 0.41821

```

#END

```

data_3b_3
_symmetry_cell_setting      monoclinic
_symmetry_space_group_name_H-M 'P 21/a'
_symmetry_Int_Tables_number 14
loop_

```

```

_symmetry_equiv_pos_site_id
_symmetry_equiv_pos_as_xyz
1 x,y,z
2 1/2-x,1/2+y,-z
3 -x,-y,-z
4 1/2+x,1/2-y,z
_cell_length_a      19.060
_cell_length_b      14.215
_cell_length_c      5.388
_cell_angle_alpha   90.00
_cell_angle_beta    143.36
_cell_angle_gamma   90.00
_cell_volume        871.195
loop_
_atom_site_label
_atom_site_type_symbol
_atom_site_fract_x
_atom_site_fract_y
_atom_site_fract_z
N1 N -0.17159 0.55978 0.34177
H*2 H -0.19674 0.50147 0.16984
H*3 H -0.10187 0.54166 0.65285
H*4 H -0.14777 0.61255 0.28755
O5 O -0.27181 0.58418 0.19576
H*6 H -0.25159 0.63952 0.35174
C1+ C -0.14755 0.30650 0.79645
N'2+ N -0.23048 0.26565 0.70570
C3+ C -0.08486 0.26013 0.77672
C4+ C 0.02958 0.17008 0.74765
N'5+ N -0.26576 0.33126 0.76242
N'6+ N -0.20911 0.41228 0.88810
N7+ N -0.13393 0.39858 0.91134
N'8+ N -0.01855 0.31284 0.80946
N9+ N 0.03782 0.26538 0.79333
N10+ N -0.04263 0.12253 0.70161
N'11+ N -0.10011 0.16541 0.71968
O12+ O -0.06472 0.46166 1.02693
O13+ O -0.05279 0.03448 0.64142
O14+ O 0.10121 0.30839 0.81665
N15+ N 0.09270 0.12320 0.75151
H*16+ H 0.06195 0.05782 0.62681
H*17+ H 0.12213 0.16475 0.69546

```

#END

```

data_3b_4
_symmetry_cell_setting      monoclinic
_symmetry_space_group_name_H-M 'P 21/c'
_symmetry_Int_Tables_number 14
loop_
_symmetry_equiv_pos_site_id
_symmetry_equiv_pos_as_xyz

```

```

1 x,y,z
2 -x,1/2+y,1/2-z
3 -x,-y,-z
4 x,1/2-y,1/2+z
_cell_length_a      5.895
_cell_length_b      14.181
_cell_length_c      11.671
_cell_angle_alpha   90.00
_cell_angle_beta    110.15
_cell_angle_gamma   90.00
_cell_volume        915.944
loop_
_atom_site_label
_atom_site_type_symbol
_atom_site_fract_x
_atom_site_fract_y
_atom_site_fract_z
N1 N 0.22326 0.41495 0.62477
H*2 H 0.35873 0.46316 0.66387
H*3 H 0.21343 0.40271 0.53594
H*4 H 0.26192 0.35343 0.67519
O5 O 0.01249 0.45837 0.62982
H*6 H -0.12117 0.41472 0.59342
C1+ C 0.37130 0.32155 0.26494
N'2+ N 0.24690 0.24230 0.27010
C3+ C 0.52339 0.33270 0.19208
C4+ C 0.80559 0.34733 0.05967
N'5+ N 0.13161 0.26088 0.34656
N'6+ N 0.17678 0.34799 0.39167
N7+ N 0.32765 0.38799 0.34128
N'8+ N 0.60554 0.41994 0.17992
N9+ N 0.74693 0.42487 0.11264
N10+ N 0.70794 0.26241 0.07276
N'11+ N 0.56820 0.25250 0.13971
O12+ O 0.40993 0.47121 0.36562
O13+ O 0.75678 0.19210 0.01821
O14+ O 0.83101 0.50352 0.09463
N15+ N 0.95973 0.35415 -0.00397
H*16+ H 0.95015 0.29910 -0.06078
H*17+ H 0.97925 0.42067 -0.03090

```

#END

```

data_3b_5
_symmetry_cell_setting      monoclinic
_symmetry_space_group_name_H-M 'P 21/a'
_symmetry_Int_Tables_number 14
loop_
_symmetry_equiv_pos_site_id
_symmetry_equiv_pos_as_xyz
1 x,y,z
2 1/2-x,1/2+y,-z

```

```

3 -x,-y,-z
4 1/2+x,1/2-y,z
_cell_length_a      11.332
_cell_length_b      16.273
_cell_length_c       5.083
_cell_angle_alpha   90.00
_cell_angle_beta    70.65
_cell_angle_gamma   90.00
_cell_volume        884.386
loop_
_atom_site_label
_atom_site_type_symbol
_atom_site_fract_x
_atom_site_fract_y
_atom_site_fract_z
N1 N 0.67995 0.08519 -0.27472
H*2 H 0.67034 0.03130 -0.37226
H*3 H 0.59298 0.10330 -0.14361
H*4 H 0.74022 0.07516 -0.16370
O5 O 0.72963 0.14146 -0.49344
H*6 H 0.74026 0.19371 -0.40943
C1+ C 0.85677 0.32065 -0.29719
N'2+ N 0.78349 0.30003 -0.45016
C3+ C 0.91181 0.26310 -0.15603
C4+ C 1.00630 0.15460 0.10524
N'5+ N 0.75249 0.36988 -0.54260
N'6+ N 0.80144 0.43460 -0.45525
N7+ N 0.86810 0.40513 -0.29995
N'8+ N 0.99910 0.29061 -0.04888
N9+ N 1.04483 0.23444 0.08107
N10+ N 0.92115 0.13123 -0.01766
N'11+ N 0.87089 0.18428 -0.14726
O12+ O 0.92633 0.45062 -0.18094
O13+ O 0.89090 0.05590 -0.00270
O14+ O 1.12802 0.25382 0.18598
N15+ N 1.05080 0.09951 0.25068
H*16+ H 1.03873 0.04007 0.20598
H*17+ H 1.13125 0.11735 0.27979

```

#END

**S22.** Optimized crystal structure coordinates for 5 polymorphs of Hydrazinium 6-amino-3-(1-hydroxy-1*H*-tetrazolate-5-yl)-1,2,4,5-tetrazine 1,5-dioxide (ionic form).

```

data_3c_1
_symmetry_cell_setting      monoclinic
_symmetry_space_group_name_H-M 'P 21/c'
_symmetry_Int_Tables_number 14
loop_
_symmetry_equiv_pos_site_id
_symmetry_equiv_pos_as_xyz
1 x,y,z

```

2 -x,1/2+y,1/2-z  
 3 -x,-y,-z  
 4 x,1/2-y,1/2+z  
 \_cell\_length\_a           6.041  
 \_cell\_length\_b           14.703  
 \_cell\_length\_c           11.497  
 \_cell\_angle\_alpha        90.00  
 \_cell\_angle\_beta         109.49  
 \_cell\_angle\_gamma        90.00  
 \_cell\_volume             962.66  
 loop\_  
 \_atom\_site\_label  
 \_atom\_site\_type\_symbol  
 \_atom\_site\_fract\_x  
 \_atom\_site\_fract\_y  
 \_atom\_site\_fract\_z  
 N1 N 0.23446 0.08799 0.11729  
 H\*2 H 0.20466 0.09499 0.02428  
 H\*3 H 0.37048 0.04249 0.15000  
 N4 N 0.02693 0.04820 0.13293  
 H\*5 H 0.05892 0.04054 0.22543  
 H\*6 H -0.10786 0.09335 0.09899  
 H\*7 H 0.28670 0.15006 0.15960  
 C1+ C 0.38654 0.31829 0.25765  
 N'2+ N 0.26190 0.24203 0.25942  
 C3+ C 0.53982 0.32995 0.18590  
 C4+ C 0.82387 0.34570 0.05536  
 N'5+ N 0.14543 0.25890 0.33601  
 N'6+ N 0.18999 0.34206 0.38443  
 N7+ N 0.34176 0.38117 0.33616  
 N'8+ N 0.62364 0.41411 0.17703  
 N9+ N 0.76595 0.41970 0.11061  
 N10+ N 0.72488 0.26379 0.06512  
 N'11+ N 0.58406 0.25340 0.13107  
 O12+ O 0.42369 0.46085 0.36386  
 O13+ O 0.77348 0.19681 0.00845  
 O14+ O 0.85171 0.49567 0.09560  
 N15+ N 0.97854 0.35303 -0.00724  
 H\*16+ H 0.97045 0.30091 -0.06616  
 H\*17+ H 1.00111 0.41758 -0.03208

#END

data\_3c\_2  
 \_symmetry\_cell\_setting    monoclinic  
 \_symmetry\_space\_group\_name\_H-M 'P 21/c'  
 \_symmetry\_Int\_Tables\_number   14  
 loop\_  
 \_symmetry\_equiv\_pos\_site\_id  
 \_symmetry\_equiv\_pos\_as\_xyz  
 1 x,y,z  
 2 -x,1/2+y,1/2-z

```

3 -x,-y,-z
4 x,1/2-y,1/2+z
_cell_length_a          9.765
_cell_length_b          6.528
_cell_length_c          14.513
_cell_angle_alpha       90.00
_cell_angle_beta        95.67
_cell_angle_gamma       90.00
_cell_volume            920.618
loop_
_atom_site_label
_atom_site_type_symbol
_atom_site_fract_x
_atom_site_fract_y
_atom_site_fract_z
N1 N -0.20643 0.12471 0.51481
H*2 H -0.15834 0.08775 0.45709
H*3 H -0.15575 0.04611 0.56939
N4 N -0.34646 0.04942 0.50129
H*5 H -0.39300 0.08467 0.55930
H*6 H -0.39560 0.12655 0.44636
H*7 H -0.19514 0.27991 0.52710
C1+ C 0.05095 0.04228 0.25637
N'2+ N 0.02248 0.03417 0.34577
C3+ C 0.18725 0.04521 0.22630
C4+ C 0.43970 0.05715 0.17609
N'5+ N -0.11309 0.03439 0.34358
N'6+ N -0.17355 0.04367 0.25720
N7+ N -0.07201 0.04839 0.20063
N'8+ N 0.20126 0.01987 0.13513
N9+ N 0.32964 0.02654 0.11219
N10+ N 0.41706 0.07388 0.26716
N'11+ N 0.29169 0.07097 0.29448
O12+ O -0.09356 0.05986 0.11302
O13+ O 0.52159 0.09330 0.32569
O14+ O 0.35383 0.00226 0.02870
N15+ N 0.56920 0.07254 0.14971
H*16+ H 0.64453 0.04996 0.20189
H*17+ H 0.57903 0.01453 0.08594

```

#END

```

data_3c_3
_symmetry_cell_setting    monoclinic
_symmetry_space_group_name_H-M 'P 21/a'
_symmetry_Int_Tables_number 14
loop_
_symmetry_equiv_pos_site_id
_symmetry_equiv_pos_as_xyz
1 x,y,z
2 1/2-x,1/2+y,-z
3 -x,-y,-z

```

```

4 1/2+x,1/2-y,z
_cell_length_a      8.030
_cell_length_b     13.792
_cell_length_c      8.556
_cell_angle_alpha   90.00
_cell_angle_beta    83.99
_cell_angle_gamma   90.00
_cell_volume        942.367
loop_
_atom_site_label
_atom_site_type_symbol
_atom_site_fract_x
_atom_site_fract_y
_atom_site_fract_z
N1 N 0.41237 0.63468 0.44072
H*2 H 0.52198 0.62633 0.49164
H*3 H 0.32039 0.60013 0.51287
N4 N 0.43046 0.58491 0.29087
H*5 H 0.32051 0.59261 0.24191
H*6 H 0.52325 0.61896 0.22056
H*7 H 0.38403 0.70764 0.43742
C1+ C -0.07549 0.51572 0.32158
N'2+ N -0.21497 0.51355 0.42530
C3+ C 0.00342 0.43194 0.24518
C4+ C 0.14490 0.27516 0.11337
N'5+ N -0.24585 0.60446 0.46754
N'6+ N -0.13252 0.66514 0.39703
N7+ N -0.02344 0.61084 0.30374
N'8+ N 0.12541 0.44565 0.12559
N9+ N 0.19393 0.36527 0.06175
N10+ N 0.01667 0.26761 0.23089
N'11+ N -0.05553 0.34475 0.30067
O12+ O 0.10253 0.64577 0.22030
O13+ O -0.03152 0.18297 0.27215
O14+ O 0.30797 0.37030 -0.05211
N15+ N 0.22293 0.19448 0.05024
H*16+ H 0.15590 0.13269 0.07061
H*17+ H 0.28851 0.20583 -0.05592

```

#END

```

data_3c_4
_symmetry_cell_setting      orthorhombic
_symmetry_space_group_name_H-M 'P 21 21 21'
_symmetry_Int_Tables_number 19
loop_
_symmetry_equiv_pos_site_id
_symmetry_equiv_pos_as_xyz
1 x,y,z
2 1/2+x,1/2-y,-z
3 -x,1/2+y,1/2-z
4 1/2-x,-y,1/2+z

```

```

_cell_length_a      11.504
_cell_length_b      13.775
_cell_length_c       5.770
_cell_angle_alpha    90.00
_cell_angle_beta     90.00
_cell_angle_gamma    90.00
_cell_volume         914.358
loop_
_atom_site_label
_atom_site_type_symbol
_atom_site_fract_x
_atom_site_fract_y
_atom_site_fract_z
N1 N -0.05099 0.46800 -0.49281
H*2 H -0.00123 0.51012 -0.60157
H*3 H -0.01834 0.39861 -0.50290
N4 N -0.16872 0.46682 -0.58158
H*5 H -0.21724 0.42399 -0.47415
H*6 H -0.20003 0.53614 -0.57339
H*7 H -0.04094 0.49295 -0.32520
C1+ C 0.54790 0.28437 0.44784
N'2+ N 0.48352 0.22729 0.58950
C3+ C 0.61294 0.25054 0.25022
C4+ C 0.73331 0.18329 -0.10470
N'5+ N 0.43855 0.28569 0.74745
N'6+ N 0.47137 0.37755 0.71570
N7+ N 0.54045 0.37875 0.52688
N'8+ N 0.65789 0.31685 0.10204
N9+ N 0.71790 0.28060 -0.07479
N10+ N 0.68149 0.12114 0.04806
N'11+ N 0.62176 0.15252 0.22927
O12+ O 0.58828 0.45518 0.44887
O13+ O 0.69288 0.03090 0.01075
O14+ O 0.76244 0.33663 -0.22463
N15+ N 0.79971 0.14877 -0.28162
H*16+ H 0.78527 0.07795 -0.31928
H*17+ H 0.81249 0.19731 -0.41110

```

#END

```

data_3c_5
_symmetry_cell_setting      orthorhombic
_symmetry_space_group_name_H-M 'P 21 21 21'
_symmetry_Int_Tables_number 19
loop_
_symmetry_equiv_pos_site_id
_symmetry_equiv_pos_as_xyz
1 x,y,z
2 1/2+x,1/2-y,-z
3 -x,1/2+y,1/2-z
4 1/2-x,-y,1/2+z
_cell_length_a              5.194

```

```

_cell_length_b          7.816
_cell_length_c          23.223
_cell_angle_alpha       90.00
_cell_angle_beta        90.00
_cell_angle_gamma       90.00
_cell_volume            942.768
loop_
_atom_site_label
_atom_site_type_symbol
_atom_site_fract_x
_atom_site_fract_y
_atom_site_fract_z
N1 N 0.68384 0.36355 0.08066
H*2 H 0.69389 0.39724 0.03790
H*3 H 0.74449 0.23853 0.08336
N4 N 0.41650 0.37028 0.09821
H*5 H 0.40785 0.33482 0.14051
H*6 H 0.35696 0.49444 0.09479
H*7 H 0.80960 0.43957 0.10373
C1+ C -0.36149 0.10143 0.59230
N'2+ N -0.42520 -0.03973 0.56161
C3+ C -0.15781 0.10999 0.63435
C4+ C 0.21239 0.11531 0.71222
N'5+ N -0.61981 0.00551 0.52830
N'6+ N -0.68605 0.16860 0.53626
N7+ N -0.52518 0.23238 0.57647
N'8+ N -0.08736 0.26505 0.65498
N9+ N 0.09958 0.26325 0.69407
N10+ N 0.13650 -0.03526 0.68769
N'11+ N -0.05057 -0.04254 0.64905
O12+ O -0.53677 0.38520 0.59491
O13+ O 0.25213 -0.17026 0.70347
O14+ O 0.18132 0.40198 0.71559
N15+ N 0.39502 0.11731 0.75423
H*16+ H 0.50460 0.01016 0.75564
H*17+ H 0.47686 0.23355 0.76039

```

#END

**S23.** Optimized crystal structure coordinates for 5 polymorphs of Guanidinium 6-amino-3-(1-hydroxy-1*H*-tetrazolate-5-yl)-1,2,4,5-tetrazine 1,5-dioxide (ionic form).

```

data_3d_1
_symmetry_cell_setting    monoclinic
_symmetry_space_group_name_H-M 'P 21'
_symmetry_Int_Tables_number 4
loop_
_symmetry_equiv_pos_site_id
_symmetry_equiv_pos_as_xyz
1 x,y,z
2 -x,1/2+y,-z
_cell_length_a            13.718

```

```

_cell_length_b      11.712
_cell_length_c      5.005
_cell_angle_alpha   90.00
_cell_angle_beta    39.49
_cell_angle_gamma   90.00
_cell_volume        511.381
loop_
_atom_site_label
_atom_site_type_symbol
_atom_site_fract_x
_atom_site_fract_y
_atom_site_fract_z
C1 C 0.65840 0.51180 0.50501
N2 N 0.60010 0.43781 0.45199
H*3 H 0.53432 0.46447 0.43706
H*4 H 0.62012 0.35309 0.42529
N5 N 0.63002 0.62348 0.53941
H*6 H 0.67294 0.68083 0.57963
H*7 H 0.56483 0.65377 0.52620
N8 N 0.74508 0.47411 0.52363
H*9 H 0.76794 0.39010 0.49834
H*10 H 0.79025 0.52854 0.56353
C1+ C -0.28257 0.05129 0.48198
N'2+ N -0.37240 0.01817 0.46532
C3+ C -0.21028 -0.02493 0.51679
C4+ C -0.08543 -0.16905 0.59495
N'5+ N -0.41558 0.11292 0.43482
N'6+ N -0.35892 0.20562 0.43391
N7+ N -0.27403 0.16898 0.46259
N'8+ N -0.10397 0.01780 0.46166
N9+ N -0.04329 -0.05698 0.50280
N10+ N -0.18947 -0.20613 0.63052
N'11+ N -0.25552 -0.13584 0.59806
O12+ O -0.20452 0.23567 0.47489
O13+ O -0.22179 -0.31171 0.69817
O14+ O 0.05848 -0.02572 0.45270
N15+ N -0.02623 -0.24222 0.65397
H*16+ H -0.03759 -0.32569 0.62862
H*17+ H 0.07177 -0.21403 0.53303

```

#END

```

data_3d_2
_symmetry_cell_setting      orthorhombic
_symmetry_space_group_name_H-M 'P b c a'
_symmetry_Int_Tables_number 61
loop_
_symmetry_equiv_pos_site_id
_symmetry_equiv_pos_as_xyz
1 x,y,z
2 1/2-x,1/2+y,z
3 x,1/2-y,1/2+z

```

4 1/2-x,-y,1/2+z  
 5 -x,-y,-z  
 6 1/2+x,1/2-y,-z  
 7 -x,1/2+y,1/2-z  
 8 1/2+x,y,1/2-z  
 \_cell\_length\_a 13.663  
 \_cell\_length\_b 11.726  
 \_cell\_length\_c 12.628  
 \_cell\_angle\_alpha 90.00  
 \_cell\_angle\_beta 90.00  
 \_cell\_angle\_gamma 90.00  
 \_cell\_volume 2023.16  
 loop\_  
 \_atom\_site\_label  
 \_atom\_site\_type\_symbol  
 \_atom\_site\_fract\_x  
 \_atom\_site\_fract\_y  
 \_atom\_site\_fract\_z  
 C1 C 0.40890 -0.37984 -0.11346  
 N2 N 0.38977 -0.26845 -0.12284  
 H\*3 H 0.44372 -0.21138 -0.13656  
 H\*4 H 0.32079 -0.23808 -0.11648  
 N5 N 0.50090 -0.41763 -0.12223  
 H\*6 H 0.51696 -0.50144 -0.11541  
 H\*7 H 0.55703 -0.36349 -0.13594  
 N8 N 0.33604 -0.45344 -0.09530  
 H\*9 H 0.26601 -0.42671 -0.08841  
 H\*10 H 0.34888 -0.53795 -0.08795  
 C1+ C -0.03660 0.16000 0.61033  
 N'2+ N -0.13055 0.12665 0.59569  
 C3+ C 0.04541 0.08396 0.62332  
 C4+ C 0.19186 -0.06002 0.65019  
 N'5+ N -0.18246 0.22129 0.58750  
 N'6+ N -0.12676 0.31410 0.59686  
 N7+ N -0.03407 0.27769 0.61116  
 N'8+ N 0.13699 0.12787 0.62004  
 N9+ N 0.20903 0.05312 0.63375  
 N10+ N 0.09739 -0.09803 0.64852  
 N'11+ N 0.02228 -0.02790 0.63650  
 O12+ O 0.03814 0.34447 0.62420  
 O13+ O 0.08359 -0.20435 0.65938  
 O14+ O 0.29747 0.08550 0.63091  
 N15+ N 0.26709 -0.13338 0.66880  
 H\*16+ H 0.24976 -0.21640 0.65686  
 H\*17+ H 0.33326 -0.10324 0.64581

#END

data\_3d\_3  
 \_symmetry\_cell\_setting monoclinic  
 \_symmetry\_space\_group\_name\_H-M 'P 21/a'  
 \_symmetry\_Int\_Tables\_number 14

```

loop_
_symmetry_equiv_pos_site_id
_symmetry_equiv_pos_as_xyz
1 x,y,z
2 1/2-x,1/2+y,-z
3 -x,-y,-z
4 1/2+x,1/2-y,z
_cell_length_a          14.718
_cell_length_b          11.914
_cell_length_c          6.311
_cell_angle_alpha       90.00
_cell_angle_beta        67.85
_cell_angle_gamma       90.00
_cell_volume            1024.97
loop_
_atom_site_label
_atom_site_type_symbol
_atom_site_fract_x
_atom_site_fract_y
_atom_site_fract_z
C1 C 0.41011 -0.11912 -0.14165
N2 N 0.39213 -0.22942 -0.11949
H*3 H 0.32312 -0.25928 -0.04326
H*4 H 0.44704 -0.28614 -0.17834
N5 N 0.33600 -0.04596 -0.06215
H*6 H 0.34796 0.03773 -0.07711
H*7 H 0.26589 -0.07221 0.01521
N8 N 0.50219 -0.08198 -0.24331
H*9 H 0.55925 -0.13581 -0.30458
H*10 H 0.51740 0.00100 -0.26182
C1+ C -0.03850 0.16609 0.77065
N'2+ N -0.13379 0.13457 0.84210
C3+ C 0.04385 0.09023 0.70016
C4+ C 0.19118 -0.05350 0.58061
N'5+ N -0.18554 0.22831 0.89057
N'6+ N -0.12839 0.31877 0.85544
N7+ N -0.03494 0.28173 0.77904
N'8+ N 0.13527 0.13305 0.59790
N9+ N 0.20775 0.05847 0.53973
N10+ N 0.09648 -0.09027 0.67702
N'11+ N 0.02105 -0.02030 0.74139
O12+ O 0.03880 0.34632 0.73089
O13+ O 0.08282 -0.19527 0.70415
O14+ O 0.29599 0.08995 0.44078
N15+ N 0.26728 -0.12699 0.52844
H*16+ H 0.24826 -0.20790 0.51772
H*17+ H 0.33148 -0.09655 0.41502

```

#END

```

data_3d_4
_symmetry_cell_setting    monoclinic

```

```

_symmetry_space_group_name_H-M 'P 21/a'
_symmetry_Int_Tables_number 14
loop_
_symmetry_equiv_pos_site_id
_symmetry_equiv_pos_as_xyz
1 x,y,z
2 1/2-x,1/2+y,-z
3 -x,-y,-z
4 1/2+x,1/2-y,z
_cell_length_a 11.891
_cell_length_b 13.640
_cell_length_c 6.323
_cell_angle_alpha 90.00
_cell_angle_beta 91.54
_cell_angle_gamma 90.00
_cell_volume 1025.18
loop_
_atom_site_label
_atom_site_type_symbol
_atom_site_fract_x
_atom_site_fract_y
_atom_site_fract_z
C1 C 0.61739 0.59045 0.76657
N2 N 0.54498 0.66413 0.79355
H*3 H 0.46120 0.65210 0.79714
H*4 H 0.57194 0.73400 0.81113
N5 N 0.57934 0.49869 0.74370
H*6 H 0.63259 0.44195 0.72314
H*7 H 0.49623 0.48342 0.74632
N8 N 0.72785 0.60852 0.76246
H*9 H 0.75838 0.67730 0.77943
H*10 H 0.78400 0.55393 0.74226
C1+ C -0.16278 0.46219 0.22306
N'2+ N -0.13131 0.36779 0.19441
C3+ C -0.08667 0.54409 0.24335
C4+ C 0.05754 0.69034 0.28652
N'5+ N -0.22529 0.31617 0.18390
N'6+ N -0.31586 0.37250 0.20583
N7+ N -0.27864 0.46531 0.23042
N'8+ N -0.12956 0.63600 0.23679
N9+ N -0.05474 0.70793 0.25883
N10+ N 0.09434 0.59552 0.28354
N'11+ N 0.02414 0.52051 0.26473
O12+ O -0.34326 0.53809 0.25804
O13+ O 0.19959 0.58128 0.30035
O14+ O -0.08627 0.79664 0.25266
N15+ N 0.13129 0.76552 0.31832
H*16+ H 0.21229 0.74764 0.29082
H*17+ H 0.10069 0.83172 0.27232

```

#END

```

data_3d_5
_symmetry_cell_setting      monoclinic
_symmetry_space_group_name_H-M 'P 21/c'
_symmetry_Int_Tables_number 14
loop_
_symmetry_equiv_pos_site_id
_symmetry_equiv_pos_as_xyz
1 x,y,z
2 -x,1/2+y,1/2-z
3 -x,-y,-z
4 x,1/2-y,1/2+z
_cell_length_a              17.663
_cell_length_b              11.856
_cell_length_c              30.743
_cell_angle_alpha           90.00
_cell_angle_beta            9.45
_cell_angle_gamma           90.00
_cell_volume                1057.03
loop_
_atom_site_label
_atom_site_type_symbol
_atom_site_fract_x
_atom_site_fract_y
_atom_site_fract_z
C1 C 0.23994 0.20605 0.46437
N2 N 0.25272 0.31675 0.44888
H*3 H 0.31604 0.34626 0.38274
H*4 H 0.19944 0.37413 0.50286
N5 N 0.31173 0.13201 0.39157
H*6 H 0.30361 0.04801 0.40170
H*7 H 0.37621 0.15790 0.32431
N8 N 0.15536 0.16939 0.55266
H*9 H 0.10017 0.22388 0.60867
H*10 H 0.14417 0.08612 0.56594
C1+ C 0.67390 0.25148 0.05877
N'2+ N 0.51213 0.22066 0.19003
C3+ C 0.77359 0.17491 -0.03290
C4+ C 0.96392 0.02970 -0.20335
N'5+ N 0.46792 0.31489 0.23764
N'6+ N 0.59621 0.40495 0.14196
N7+ N 0.72724 0.36718 0.02821
N'8+ N 0.86133 0.21805 -0.12255
N9+ N 0.95549 0.14272 -0.20667
N10+ N 0.85487 -0.00710 -0.10073
N'11+ N 0.76325 0.06352 -0.01659
O12+ O 0.87581 0.43116 -0.08602
O13+ O 0.84548 -0.11282 -0.08917
O14+ O 1.03754 0.17448 -0.29176
N15+ N 1.08235 -0.04481 -0.30222
H*16+ H 0.98224 -0.12514 -0.23938
H*17+ H 1.05748 -0.01298 -0.31862

```

#END

**S24.** Optimized crystal structure coordinates for 5 polymorphs of Aminoguanidinium 6-amino-3-(1-hydroxy-1*H*-tetrazolate-5-yl)-1,2,4,5-tetrazine 1,5-dioxide (ionic form).

```
data_3e_1
_symmetry_cell_setting      monoclinic
_symmetry_space_group_name_H-M 'P 21/a'
_symmetry_Int_Tables_number 14
loop_
_symmetry_equiv_pos_site_id
_symmetry_equiv_pos_as_xyz
1 x,y,z
2 1/2-x,1/2+y,-z
3 -x,-y,-z
4 1/2+x,1/2-y,z
_cell_length_a              27.604
_cell_length_b              8.970
_cell_length_c              4.518
_cell_angle_alpha           90.00
_cell_angle_beta            97.22
_cell_angle_gamma           90.00
_cell_volume                1109.82
loop_
_atom_site_label
_atom_site_type_symbol
_atom_site_fract_x
_atom_site_fract_y
_atom_site_fract_z
C1 C -0.09350 0.14513 -0.05474
N2 N -0.13659 0.07459 -0.09930
H*3 H -0.16473 0.10518 0.01033
H*4 H -0.14212 -0.01132 -0.24412
N5 N -0.08762 0.25915 0.14029
H*6 H -0.11575 0.29043 0.25113
N7 N -0.05649 0.10479 -0.19913
H*8 H -0.05950 0.01987 -0.34700
H*9 H -0.02467 0.16193 -0.15709
N10 N -0.04254 0.33240 0.18590
H*11 H -0.04668 0.44191 0.12863
H*12 H -0.02762 0.32268 0.40297
C1+ C 0.60502 0.19012 -0.15638
N'2+ N 0.55754 0.15465 -0.14691
C3+ C 0.64602 0.11371 0.00537
C4+ C 0.71942 -0.02793 0.31559
N'5+ N 0.53178 0.25062 -0.32423
N'6+ N 0.56027 0.34695 -0.44609
N7+ N 0.60682 0.31092 -0.34398
N'8+ N 0.69142 0.14468 -0.06110
N9+ N 0.72753 0.07143 0.09892
N10+ N 0.67235 -0.05684 0.36124
N'11+ N 0.63479 0.01353 0.21203
```

O12+ O 0.64358 0.38183 -0.41362  
O13+ O 0.66563 -0.15448 0.55499  
O14+ O 0.77135 0.09137 0.05161  
N15+ N 0.75737 -0.09590 0.48462  
H\*16+ H 0.74780 -0.18911 0.58985  
H\*17+ H 0.78908 -0.09307 0.39346

#END

data\_3e\_2

\_symmetry\_cell\_setting orthorhombic  
\_symmetry\_space\_group\_name\_H-M 'P 21 21 21'  
\_symmetry\_Int\_Tables\_number 19

loop\_

\_symmetry\_equiv\_pos\_site\_id

\_symmetry\_equiv\_pos\_as\_xyz

1 x,y,z

2 1/2+x,1/2-y,-z

3 -x,1/2+y,1/2-z

4 1/2-x,-y,1/2+z

\_cell\_length\_a 7.836

\_cell\_length\_b 26.602

\_cell\_length\_c 5.266

\_cell\_angle\_alpha 90.00

\_cell\_angle\_beta 90.00

\_cell\_angle\_gamma 90.00

\_cell\_volume 1097.71

loop\_

\_atom\_site\_label

\_atom\_site\_type\_symbol

\_atom\_site\_fract\_x

\_atom\_site\_fract\_y

\_atom\_site\_fract\_z

C1 C 0.42566 0.42400 0.03746

N2 N 0.35767 0.37797 0.01649

H\*3 H 0.38470 0.35060 0.14327

H\*4 H 0.27732 0.36937 -0.12704

N5 N 0.53223 0.43394 0.23162

H\*6 H 0.55990 0.40662 0.35961

N7 N 0.39002 0.45999 -0.12949

H\*8 H 0.31072 0.45397 -0.27752

H\*9 H 0.44493 0.49416 -0.10477

N10 N 0.60286 0.48209 0.25252

H\*11 H 0.56679 0.49832 0.41926

H\*12 H 0.73248 0.48025 0.24153

C1+ C 0.00061 -0.13470 0.23864

N'2+ N -0.09296 -0.15747 0.05555

C3+ C 0.09437 -0.16046 0.43484

C4+ C 0.25856 -0.20993 0.79420

N'5+ N -0.15781 -0.12097 -0.08454

N'6+ N -0.11168 -0.07574 0.00015

N7+ N -0.01106 -0.08337 0.20431

N<sup>8+</sup> N 0.20439 -0.13375 0.57997  
N<sup>9+</sup> N 0.28504 -0.15977 0.75892  
N<sup>10+</sup> N 0.15002 -0.23446 0.63351  
N<sup>11+</sup> N 0.06423 -0.21065 0.45345  
O<sup>12+</sup> O 0.05398 -0.04795 0.33397  
O<sup>13+</sup> O 0.13323 -0.28151 0.66319  
O<sup>14+</sup> O 0.39210 -0.13832 0.90306  
N<sup>15+</sup> N 0.33731 -0.23497 0.98665  
H\*<sup>16+</sup> H 0.33967 -0.27278 0.96370  
H\*<sup>17+</sup> H 0.44066 -0.21687 1.05744

#END

data\_3e\_3  
\_symmetry\_cell\_setting orthorhombic  
\_symmetry\_space\_group\_name\_H-M 'P 21 21 21'  
\_symmetry\_Int\_Tables\_number 19  
loop\_  
\_symmetry\_equiv\_pos\_site\_id  
\_symmetry\_equiv\_pos\_as\_xyz  
1 x,y,z  
2 1/2+x,1/2-y,-z  
3 -x,1/2+y,1/2-z  
4 1/2-x,-y,1/2+z  
\_cell\_length\_a 28.128  
\_cell\_length\_b 4.481  
\_cell\_length\_c 8.927  
\_cell\_angle\_alpha 90.00  
\_cell\_angle\_beta 90.00  
\_cell\_angle\_gamma 90.00  
\_cell\_volume 1125.17  
loop\_  
\_atom\_site\_label  
\_atom\_site\_type\_symbol  
\_atom\_site\_fract\_x  
\_atom\_site\_fract\_y  
\_atom\_site\_fract\_z  
C1 C -0.09669 0.15734 -0.57146  
N2 N -0.13930 0.18759 -0.63677  
H\*<sup>3</sup> H -0.16776 0.06912 -0.60167  
H\*<sup>4</sup> H -0.14414 0.33007 -0.72310  
N5 N -0.09172 -0.03504 -0.45666  
H\*<sup>6</sup> H -0.12017 -0.15471 -0.42087  
N7 N -0.05925 0.31335 -0.61773  
H\*<sup>8</sup> H -0.06158 0.45970 -0.70342  
H\*<sup>9</sup> H -0.02782 0.28192 -0.56438  
N10 N -0.04712 -0.06568 -0.38890  
H\*<sup>11</sup> H -0.04899 -0.00762 -0.27874  
H\*<sup>12</sup> H -0.03526 -0.27942 -0.39941  
C1+ C 0.60812 0.04661 -0.52596  
N<sup>2+</sup> N 0.56211 -0.00278 -0.56324  
C3+ C 0.64854 -0.08210 -0.60128

C4+ C 0.72093 -0.33336 -0.74099  
 N'5+ N 0.53642 0.15442 -0.46774  
 N'6+ N 0.56357 0.30125 -0.37000  
 N7+ N 0.60912 0.23733 -0.40457  
 N'8+ N 0.69245 0.02302 -0.56861  
 N9+ N 0.72809 -0.10805 -0.64092  
 N10+ N 0.67535 -0.41889 -0.77166  
 N'11+ N 0.63833 -0.29993 -0.70228  
 O12+ O 0.64448 0.33843 -0.33206  
 O13+ O 0.66951 -0.61991 -0.86995  
 O14+ O 0.77054 -0.02358 -0.61939  
 N15+ N 0.75836 -0.47197 -0.80794  
 H\*16+ H 0.74957 -0.58614 -0.90190  
 H\*17+ H 0.78901 -0.35346 -0.80401

#END

data\_3e\_4  
 \_symmetry\_cell\_setting orthorhombic  
 \_symmetry\_space\_group\_name\_H-M 'P 21 21 21'  
 \_symmetry\_Int\_Tables\_number 19  
 loop\_  
 \_symmetry\_equiv\_pos\_site\_id  
 \_symmetry\_equiv\_pos\_as\_xyz  
 1 x,y,z  
 2 1/2+x,1/2-y,-z  
 3 -x,1/2+y,1/2-z  
 4 1/2-x,-y,1/2+z  
 \_cell\_length\_a 16.447  
 \_cell\_length\_b 10.622  
 \_cell\_length\_c 6.493  
 \_cell\_angle\_alpha 90.00  
 \_cell\_angle\_beta 90.00  
 \_cell\_angle\_gamma 90.00  
 \_cell\_volume 1134.33  
 loop\_  
 \_atom\_site\_label  
 \_atom\_site\_type\_symbol  
 \_atom\_site\_fract\_x  
 \_atom\_site\_fract\_y  
 \_atom\_site\_fract\_z  
 C1 C 0.35426 0.57826 0.19245  
 N2 N 0.33143 0.48072 0.07507  
 H\*3 H 0.32964 0.48744 -0.08008  
 H\*4 H 0.31535 0.39759 0.13868  
 N5 N 0.37524 0.68748 0.10160  
 H\*6 H 0.37357 0.69485 -0.05417  
 N7 N 0.35660 0.56931 0.39661  
 H\*8 H 0.34132 0.48901 0.47028  
 H\*9 H 0.37433 0.64599 0.47815  
 N10 N 0.39904 0.78903 0.22501  
 H\*11 H 0.45719 0.81474 0.19127

H\*12 H 0.36065 0.86318 0.20404  
C1+ C -0.24211 0.55010 0.28818  
N'2+ N -0.32338 0.52978 0.28260  
C3+ C -0.18101 0.45284 0.28604  
C4+ C -0.07232 0.26996 0.28871  
N'5+ N -0.35770 0.64219 0.28730  
N'6+ N -0.30260 0.73406 0.29709  
N7+ N -0.22893 0.67833 0.29742  
N'8+ N -0.10233 0.48626 0.25845  
N9+ N -0.04919 0.39198 0.26045  
N10+ N -0.15326 0.24377 0.30793  
N'11+ N -0.20918 0.33339 0.30969  
O12+ O -0.16243 0.73882 0.30807  
O13+ O -0.17351 0.12903 0.32504  
O14+ O 0.02588 0.41327 0.23373  
N15+ N -0.01599 0.17636 0.29939  
H\*16+ H -0.03904 0.08915 0.27512  
H\*17+ H 0.03881 0.20012 0.23960

#END

data\_3e\_5  
\_symmetry\_cell\_setting monoclinic  
\_symmetry\_space\_group\_name\_H-M 'P 21/c'  
\_symmetry\_Int\_Tables\_number 14  
loop\_  
\_symmetry\_equiv\_pos\_site\_id  
\_symmetry\_equiv\_pos\_as\_xyz  
1 x,y,z  
2 -x,1/2+y,1/2-z  
3 -x,-y,-z  
4 x,1/2-y,1/2+z  
\_cell\_length\_a 9.756  
\_cell\_length\_b 6.702  
\_cell\_length\_c 19.042  
\_cell\_angle\_alpha 90.00  
\_cell\_angle\_beta 83.30  
\_cell\_angle\_gamma 90.00  
\_cell\_volume 1236.55  
loop\_  
\_atom\_site\_label  
\_atom\_site\_type\_symbol  
\_atom\_site\_fract\_x  
\_atom\_site\_fract\_y  
\_atom\_site\_fract\_z  
C1 C 0.72054 -0.47574 0.52761  
N2 N 0.67378 -0.58635 0.58397  
H\*3 H 0.67759 -0.73696 0.58238  
H\*4 H 0.63334 -0.52198 0.62972  
N5 N 0.77369 -0.56736 0.46762  
H\*6 H 0.77781 -0.71859 0.46567  
N7 N 0.71548 -0.27755 0.52977

H\*8 H 0.67637 -0.20352 0.57378  
 H\*9 H 0.75227 -0.20100 0.48561  
 N10 N 0.82237 -0.45103 0.40892  
 H\*11 H 0.92489 -0.47639 0.39502  
 H\*12 H 0.76835 -0.48196 0.36757  
 C1+ C 0.51606 -0.01543 0.26354  
 N'2+ N 0.48822 -0.01215 0.19551  
 C3+ C 0.65246 -0.01850 0.28557  
 C4+ C 0.90506 -0.03083 0.32225  
 N'5+ N 0.35231 -0.01035 0.19809  
 N'6+ N 0.29103 -0.01372 0.26443  
 N7+ N 0.39238 -0.01656 0.30691  
 N'8+ N 0.66608 0.01108 0.35474  
 N9+ N 0.79455 0.00409 0.37142  
 N10+ N 0.88286 -0.05190 0.25315  
 N'11+ N 0.75741 -0.04886 0.23314  
 O12+ O 0.37007 -0.02251 0.37395  
 O13+ O 0.98788 -0.07555 0.20800  
 O14+ O 0.81841 0.03207 0.43468  
 N15+ N 1.03455 -0.04614 0.34164  
 H\*16+ H 1.11061 -0.02812 0.30114  
 H\*17+ H 1.04445 0.01378 0.38964

#END

**S25.** Optimized crystal structure coordinates for 5 polymorphs of Diaminoguanidinium 6-amino-3-(1-hydroxy-1*H*-tetrazolate-5-yl)-1,2,4,5-tetrazine 1,5-dioxide (ionic form).

```

data_3f_1
_symmetry_cell_setting      orthorhombic
_symmetry_space_group_name_H-M 'P b c a'
_symmetry_Int_Tables_number 61
loop_
_symmetry_equiv_pos_site_id
_symmetry_equiv_pos_as_xyz
1 x,y,z
2 1/2-x,1/2+y,z
3 x,1/2-y,1/2+z
4 1/2-x,-y,1/2+z
5 -x,-y,-z
6 1/2+x,1/2-y,-z
7 -x,1/2+y,1/2-z
8 1/2+x,y,1/2-z
_cell_length_a              27.390
_cell_length_b              11.978
_cell_length_c              7.137
_cell_angle_alpha           90.00
_cell_angle_beta            90.00
_cell_angle_gamma           90.00
_cell_volume                 2341.49
loop_
_atom_site_label

```

```

_atom_site_type_symbol
_atom_site_fract_x
_atom_site_fract_y
_atom_site_fract_z
C1 C -0.07443 0.23836 -0.03338
N2 N -0.12314 0.23309 -0.02058
H*3 H -0.13896 0.15644 -0.02784
N4 N -0.04878 0.14320 -0.05506
H*5 H -0.01187 0.14635 -0.06489
N6 N -0.05169 0.33657 -0.02476
H*7 H -0.07245 0.40597 -0.00838
H*8 H -0.01503 0.34293 -0.03403
N9 N -0.07387 0.04146 -0.06356
N10 N -0.14961 0.33231 0.00195
H*11 H -0.16867 0.32991 0.12441
H*12 H -0.06771 0.00336 -0.18887
H*13 H -0.06330 -0.00922 0.04353
H*14 H -0.17306 0.34246 -0.10745
C1+ C 0.62158 0.21869 0.11970
N'2+ N 0.62803 0.10680 0.10805
C3+ C 0.65972 0.29853 0.15715
C4+ C 0.73099 0.43995 0.23255
N'5+ N 0.58452 0.06415 0.07249
N'6+ N 0.55025 0.14293 0.06191
N7+ N 0.57276 0.24156 0.09089
N'8+ N 0.64989 0.40849 0.13494
N9+ N 0.68655 0.47742 0.17390
N10+ N 0.73844 0.32745 0.24477
N'11+ N 0.70332 0.25441 0.21012
O12+ O 0.55056 0.33466 0.09246
O13+ O 0.78072 0.29458 0.29174
O14+ O 0.68121 0.58193 0.15559
N15+ N 0.76702 0.51298 0.27952
H*16+ H 0.80084 0.47874 0.28090
H*17+ H 0.76198 0.59093 0.22785

```

#END

```

data_3f_2
_symmetry_cell_setting      orthorhombic
_symmetry_space_group_name_H-M 'P n a 21'
_symmetry_Int_Tables_number 33
loop_
_symmetry_equiv_pos_site_id
_symmetry_equiv_pos_as_xyz
1 x,y,z
2 1/2-x,1/2+y,1/2+z
3 1/2+x,1/2-y,z
4 -x,-y,1/2+z
_cell_length_a              27.593
_cell_length_b              4.333
_cell_length_c              9.788

```

```

_cell_angle_alpha      90.00
_cell_angle_beta      90.00
_cell_angle_gamma     90.00
_cell_volume          1170.26
loop_
_atom_site_label
_atom_site_type_symbol
_atom_site_fract_x
_atom_site_fract_y
_atom_site_fract_z
C1 C -0.08935 0.53256 -0.21887
N2 N -0.08582 0.71142 -0.10779
H*3 H -0.11438 0.85054 -0.08513
N4 N -0.13003 0.54427 -0.29492
H*5 H -0.13304 0.40963 -0.37926
N6 N -0.05304 0.34555 -0.25355
H*7 H -0.02314 0.34432 -0.19336
H*8 H -0.05476 0.20834 -0.33674
N9 N -0.16747 0.74344 -0.25547
N10 N -0.04343 0.69824 -0.02912
H*11 H -0.05155 0.62959 0.06772
H*12 H -0.17389 0.90206 -0.33004
H*13 H -0.19817 0.62133 -0.23530
H*14 H -0.02733 0.90966 -0.02679
C1+ C 0.60214 0.28564 -0.16381
N'2+ N 0.55452 0.22206 -0.18214
C3+ C 0.64077 0.17863 -0.25088
C4+ C 0.70992 -0.03372 -0.41184
N'5+ N 0.53138 0.36137 -0.08135
N'6+ N 0.56175 0.50999 0.00169
N7+ N 0.60677 0.46627 -0.04837
N'8+ N 0.68562 0.29943 -0.23409
N9+ N 0.71958 0.18776 -0.31676
N10+ N 0.66331 -0.13524 -0.42556
N'11+ N 0.62794 -0.03618 -0.34542
O12+ O 0.64472 0.57431 0.00737
O13+ O 0.65486 -0.33143 -0.51872
O14+ O 0.76264 0.28821 -0.31017
N15+ N 0.74597 -0.15318 -0.49058
H*16+ H 0.73403 -0.26162 -0.57588
H*17+ H 0.77611 -0.01985 -0.49441

```

#END

```

data_3f_3
_symmetry_cell_setting      monoclinic
_symmetry_space_group_name_H-M 'P 21/a'
_symmetry_Int_Tables_number 14
loop_
_symmetry_equiv_pos_site_id
_symmetry_equiv_pos_as_xyz
1 x,y,z

```

2 1/2-x,1/2+y,-z  
 3 -x,-y,-z  
 4 1/2+x,1/2-y,z  
 \_cell\_length\_a 10.735  
 \_cell\_length\_b 27.516  
 \_cell\_length\_c 4.329  
 \_cell\_angle\_alpha 90.00  
 \_cell\_angle\_beta 68.80  
 \_cell\_angle\_gamma 90.00  
 \_cell\_volume 1192.18

loop\_  
 \_atom\_site\_label  
 \_atom\_site\_type\_symbol  
 \_atom\_site\_fract\_x  
 \_atom\_site\_fract\_y  
 \_atom\_site\_fract\_z  
 C1 C 0.86856 0.40984 -0.42425  
 N2 N 0.75818 0.41341 -0.49846  
 H\*3 H 0.73683 0.38542 -0.62443  
 N4 N 0.94563 0.36987 -0.51828  
 H\*5 H 1.02944 0.36684 -0.46317  
 N6 N 0.90154 0.44542 -0.25946  
 H\*7 H 0.84062 0.47481 -0.19372  
 H\*8 H 0.98416 0.44367 -0.20034  
 N9 N 0.90796 0.33319 -0.69109  
 N10 N 0.67843 0.45506 -0.40004  
 H\*11 H 0.58494 0.44562 -0.24536  
 H\*12 H 0.97991 0.32839 -0.91901  
 H\*13 H 0.89147 0.30152 -0.56081  
 H\*14 H 0.67319 0.47243 -0.60272  
 C1+ C 0.81180 0.10217 -0.10976  
 N'2+ N 0.82979 0.05474 -0.05329  
 C3+ C 0.90003 0.14114 -0.10020  
 C4+ C 1.06340 0.21100 -0.06770  
 N'5+ N 0.72789 0.03116 -0.08499  
 N'6+ N 0.64449 0.06107 -0.15688  
 N7+ N 0.69544 0.10623 -0.17465  
 N'8+ N 0.88229 0.18547 -0.21358  
 N9+ N 0.96622 0.21980 -0.19395  
 N10+ N 1.07769 0.16482 0.03024  
 N'11+ N 0.99647 0.12913 0.02085  
 O12+ O 0.63975 0.14388 -0.23551  
 O13+ O 1.17250 0.15710 0.13328  
 O14+ O 0.95881 0.26242 -0.29694  
 N15+ N 1.14368 0.24750 -0.03709  
 H\*16+ H 1.22893 0.23581 -0.01151  
 H\*17+ H 1.14545 0.27693 -0.17928

#END

data\_3f\_4  
 \_symmetry\_cell\_setting monoclinic

```

_symmetry_space_group_name_H-M 'P 21/c'
_symmetry_Int_Tables_number 14
loop_
_symmetry_equiv_pos_site_id
_symmetry_equiv_pos_as_xyz
1 x,y,z
2 -x,1/2+y,1/2-z
3 -x,-y,-z
4 x,1/2-y,1/2+z
_cell_length_a 13.239
_cell_length_b 11.963
_cell_length_c 7.572
_cell_angle_alpha 90.00
_cell_angle_beta 78.66
_cell_angle_gamma 90.00
_cell_volume 1175.83
loop_
_atom_site_label
_atom_site_type_symbol
_atom_site_fract_x
_atom_site_fract_y
_atom_site_fract_z
C1 C 0.34201 0.23805 0.53543
N2 N 0.24150 0.23330 0.53105
H*3 H 0.20695 0.15705 0.54542
N4 N 0.39245 0.14293 0.55837
H*5 H 0.46860 0.14570 0.56186
N6 N 0.39135 0.33572 0.51731
H*7 H 0.35033 0.40511 0.50035
H*8 H 0.46707 0.34168 0.52010
N9 N 0.33818 0.04177 0.57697
N10 N 0.18947 0.33248 0.50717
H*11 H 0.13139 0.34561 0.61515
H*12 H 0.36870 -0.01164 0.47582
H*13 H 0.33989 0.00650 0.69871
H*14 H 0.16013 0.32751 0.39278
C1+ C -0.26134 0.21783 0.11038
N'2+ N -0.24915 0.10539 0.10535
C3+ C -0.18584 0.29687 0.14675
C4+ C -0.04560 0.43688 0.22029
N'5+ N -0.33508 0.06381 0.06839
N'6+ N -0.40245 0.14384 0.05055
N7+ N -0.35759 0.24216 0.07612
N'8+ N -0.20083 0.40689 0.11898
N9+ N -0.12881 0.47509 0.15716
N10+ N -0.03431 0.32423 0.23833
N'11+ N -0.10381 0.25192 0.20466
O12+ O -0.40134 0.33624 0.07061
O13+ O 0.04602 0.29049 0.28978
O14+ O -0.13518 0.57955 0.13389
N15+ N 0.02423 0.50936 0.26590
H*16+ H 0.09280 0.47375 0.27268

```

H\*17+ H 0.02204 0.58661 0.21192

#END

data\_3f\_5

\_symmetry\_cell\_setting monoclinic  
\_symmetry\_space\_group\_name\_H-M 'P 21/c'  
\_symmetry\_Int\_Tables\_number 14  
loop\_  
\_symmetry\_equiv\_pos\_site\_id  
\_symmetry\_equiv\_pos\_as\_xyz  
1 x,y,z  
2 -x,1/2+y,1/2-z  
3 -x,-y,-z  
4 x,1/2-y,1/2+z  
\_cell\_length\_a 15.863  
\_cell\_length\_b 11.955  
\_cell\_length\_c 7.603  
\_cell\_angle\_alpha 90.00  
\_cell\_angle\_beta 121.96  
\_cell\_angle\_gamma 90.00  
\_cell\_volume 1223.29

loop\_

\_atom\_site\_label  
\_atom\_site\_type\_symbol  
\_atom\_site\_fract\_x  
\_atom\_site\_fract\_y  
\_atom\_site\_fract\_z  
C1 C 0.35206 0.24062 0.83625  
N2 N 0.25423 0.23770 0.75969  
H\*3 H 0.21955 0.16232 0.71338  
N4 N 0.39979 0.14489 0.84854  
H\*5 H 0.47391 0.14628 0.90633  
N6 N 0.40143 0.33708 0.89937  
H\*7 H 0.36250 0.40698 0.88723  
H\*8 H 0.47517 0.34165 0.95768  
N9 N 0.34558 0.04504 0.78079  
N10 N 0.20501 0.33749 0.74728  
H\*11 H 0.17373 0.33126 0.83431  
H\*12 H 0.34943 0.01167 0.66203  
H\*13 H 0.37184 -0.01056 0.89994  
H\*14 H 0.15136 0.35344 0.59696  
C1+ C -0.25553 0.22283 0.62425  
N'2+ N -0.24235 0.11062 0.63091  
C3+ C -0.17971 0.30495 0.67264  
C4+ C -0.03654 0.45088 0.77011  
N'5+ N -0.32893 0.06566 0.57654  
N'6+ N -0.39718 0.14330 0.53651  
N7+ N -0.35270 0.24354 0.56514  
N'8+ N -0.20668 0.41359 0.62749  
N9+ N -0.13286 0.48485 0.67837  
N10+ N -0.01610 0.33919 0.80350

N\*11+ N -0.08598 0.26404 0.75870  
 O12+ O -0.39650 0.33624 0.54234  
 O13+ O 0.07347 0.30923 0.88071  
 O14+ O -0.15050 0.58831 0.64051  
 N15+ N 0.03779 0.52660 0.82886  
 H\*16+ H 0.10156 0.49301 0.85213  
 H\*17+ H 0.01414 0.60197 0.75846

#END

**S26.** Optimized crystal structure coordinates for 5 polymorphs of Triaminoguanidinium 6-amino-3-(1-hydroxy-1*H*-tetrazolate-5-yl)-1,2,4,5-tetrazine 1,5-dioxide (ionic form).

```

data_3g_1
_symmetry_cell_setting      monoclinic
_symmetry_space_group_name_H-M 'P 21/c'
_symmetry_Int_Tables_number 14
loop_
_symmetry_equiv_pos_site_id
_symmetry_equiv_pos_as_xyz
1 x,y,z
2 -x,1/2+y,1/2-z
3 -x,-y,-z
4 x,1/2-y,1/2+z
_cell_length_a              14.108
_cell_length_b              12.007
_cell_length_c              7.410
_cell_angle_alpha           90.00
_cell_angle_beta            95.62
_cell_angle_gamma           90.00
_cell_volume                1249.18
loop_
_atom_site_label
_atom_site_type_symbol
_atom_site_fract_x
_atom_site_fract_y
_atom_site_fract_z
C1 C 0.35662 0.22537 0.04798
N2 N 0.29774 0.31199 0.06124
H*3 H 0.32754 0.38745 0.09291
N4 N 0.32101 0.12402 0.00654
H*5 H 0.24901 0.11632 -0.01380
N6 N 0.45110 0.24010 0.07616
H*7 H 0.49331 0.17234 0.06483
N8 N 0.38406 0.03485 -0.00651
N9 N 0.19927 0.29441 0.03116
H*10 H 0.17138 0.34173 -0.07511
H*11 H 0.37169 -0.02497 0.08575
H*12 H 0.37547 0.00202 -0.13378
H*13 H 0.16760 0.31474 0.14442
N14 N 0.48653 0.34686 0.11929
H*15 H 0.52489 0.34586 0.24307
  
```

H\*16 H 0.52867 0.37285 0.02353  
C1+ C -0.23393 0.21049 0.34695  
N'2+ N -0.21375 0.10093 0.32980  
C3+ C -0.16802 0.30033 0.32698  
C4+ C -0.04279 0.46070 0.29467  
N'5+ N -0.29238 0.04662 0.35811  
N'6+ N -0.36213 0.11568 0.39394  
N7+ N -0.32705 0.21994 0.38735  
N'8+ N -0.20162 0.40599 0.31832  
N9+ N -0.13677 0.48471 0.30195  
N10+ N -0.01531 0.35160 0.29763  
N'11+ N -0.07610 0.26933 0.31588  
O12+ O -0.37472 0.30660 0.41733  
O13+ O 0.07178 0.33121 0.28271  
O14+ O -0.16117 0.58623 0.29076  
N15+ N 0.02240 0.54359 0.28627  
H\*16+ H 0.08456 0.51821 0.24193  
H\*17+ H -0.00637 0.61777 0.24517

#END

data\_3g\_2  
\_symmetry\_cell\_setting monoclinic  
\_symmetry\_space\_group\_name\_H-M 'P 21/c'  
\_symmetry\_Int\_Tables\_number 14  
loop\_  
\_symmetry\_equiv\_pos\_site\_id  
\_symmetry\_equiv\_pos\_as\_xyz  
1 x,y,z  
2 -x,1/2+y,1/2-z  
3 -x,-y,-z  
4 x,1/2-y,1/2+z  
\_cell\_length\_a 13.907  
\_cell\_length\_b 11.983  
\_cell\_length\_c 7.420  
\_cell\_angle\_alpha 90.00  
\_cell\_angle\_beta 80.06  
\_cell\_angle\_gamma 90.00  
\_cell\_volume 1217.96  
loop\_  
\_atom\_site\_label  
\_atom\_site\_type\_symbol  
\_atom\_site\_fract\_x  
\_atom\_site\_fract\_y  
\_atom\_site\_fract\_z  
C1 C -0.15227 0.22208 0.48222  
N2 N -0.21394 0.30858 0.48928  
H\*3 H -0.18497 0.38481 0.45249  
N4 N -0.18668 0.11974 0.52929  
H\*5 H -0.25996 0.11121 0.56955  
N6 N -0.05619 0.23792 0.42810  
H\*7 H -0.01188 0.17021 0.42462

N8 N -0.12071 0.03071 0.52074  
 N9 N -0.31403 0.28983 0.54630  
 H\*10 H -0.35124 0.31147 0.44478  
 H\*11 H -0.12431 -0.00394 0.64705  
 H\*12 H -0.13672 -0.02807 0.43131  
 H\*13 H -0.33883 0.33560 0.66052  
 N14 N -0.02207 0.34570 0.37962  
 H\*15 H 0.02495 0.37077 0.46270  
 H\*16 H 0.01253 0.34665 0.24696  
 C1+ C 0.26310 0.20383 0.13391  
 N'2+ N 0.28210 0.09321 0.14108  
 C3+ C 0.32864 0.29157 0.16756  
 C4+ C 0.45080 0.44808 0.23685  
 N'5+ N 0.20424 0.04158 0.10234  
 N'6+ N 0.13563 0.11341 0.07177  
 N7+ N 0.17112 0.21670 0.09053  
 N'8+ N 0.30745 0.39792 0.12700  
 N9+ N 0.37043 0.47465 0.16339  
 N10+ N 0.46877 0.33828 0.26752  
 N'11+ N 0.40840 0.25795 0.23631  
 O12+ O 0.12371 0.30544 0.07254  
 O13+ O 0.54623 0.31530 0.32844  
 O14+ O 0.35769 0.57657 0.12853  
 N15+ N 0.51137 0.52919 0.28025  
 H\*16+ H 0.57826 0.50104 0.29505  
 H\*17+ H 0.50462 0.60304 0.21711

#END

data\_3g\_3  
 \_symmetry\_cell\_setting orthorhombic  
 \_symmetry\_space\_group\_name\_H-M 'P b c a'  
 \_symmetry\_Int\_Tables\_number 61  
 loop\_  
 \_symmetry\_equiv\_pos\_site\_id  
 \_symmetry\_equiv\_pos\_as\_xyz  
 1 x,y,z  
 2 1/2-x,1/2+y,z  
 3 x,1/2-y,1/2+z  
 4 1/2-x,-y,1/2+z  
 5 -x,-y,-z  
 6 1/2+x,1/2-y,-z  
 7 -x,1/2+y,1/2-z  
 8 1/2+x,y,1/2-z  
 \_cell\_length\_a 12.027  
 \_cell\_length\_b 6.879  
 \_cell\_length\_c 29.103  
 \_cell\_angle\_alpha 90.00  
 \_cell\_angle\_beta 90.00  
 \_cell\_angle\_gamma 90.00  
 \_cell\_volume 2407.8  
 loop\_

\_atom\_site\_label  
\_atom\_site\_type\_symbol  
\_atom\_site\_fract\_x  
\_atom\_site\_fract\_y  
\_atom\_site\_fract\_z  
C1 C 0.27146 -0.04218 -0.42625  
N2 N 0.25490 -0.06318 -0.47153  
H\*3 H 0.32280 -0.05973 -0.49232  
N4 N 0.18475 -0.04563 -0.39732  
H\*5 H 0.10781 -0.06449 -0.41107  
N6 N 0.37473 -0.01772 -0.40990  
H\*7 H 0.38377 -0.00233 -0.37536  
N8 N 0.20426 -0.02336 -0.35014  
N9 N 0.14617 -0.08854 -0.48775  
H\*10 H 0.13961 -0.21845 -0.50432  
H\*11 H 0.16372 0.09650 -0.33826  
H\*12 H 0.17732 -0.14327 -0.33289  
H\*13 H 0.12601 0.02132 -0.50968  
N14 N 0.46395 -0.01464 -0.44086  
H\*15 H 0.50425 0.11529 -0.43886  
H\*16 H 0.51785 -0.12448 -0.43349  
C1+ C -0.29074 0.17482 0.13228  
N'2+ N -0.40047 0.16394 0.14244  
C3+ C -0.20295 0.19850 0.16552  
C4+ C -0.04651 0.24858 0.22804  
N'5+ N -0.45251 0.14291 0.10277  
N'6+ N -0.38185 0.14102 0.06748  
N7+ N -0.27887 0.16059 0.08522  
N'8+ N -0.09636 0.17556 0.15160  
N9+ N -0.01967 0.20162 0.18391  
N10+ N -0.15627 0.26206 0.23964  
N'11+ N -0.23665 0.24008 0.20901  
O12+ O -0.19127 0.16683 0.06088  
O13+ O -0.17919 0.29755 0.28134  
O14+ O 0.08252 0.18136 0.17447  
N15+ N 0.03422 0.28301 0.25976  
H\*16+ H 0.00748 0.27421 0.29271  
H\*17+ H 0.10966 0.22896 0.25098

#END

data\_3g\_4  
\_symmetry\_cell\_setting monoclinic  
\_symmetry\_space\_group\_name\_H-M 'P 21/a'  
\_symmetry\_Int\_Tables\_number 14  
loop\_  
\_symmetry\_equiv\_pos\_site\_id  
\_symmetry\_equiv\_pos\_as\_xyz  
1 x,y,z  
2 1/2-x,1/2+y,-z  
3 -x,-y,-z  
4 1/2+x,1/2-y,z

```

_cell_length_a      11.507
_cell_length_b      14.293
_cell_length_c       8.584
_cell_angle_alpha    90.00
_cell_angle_beta     117.52
_cell_angle_gamma    90.00
_cell_volume         1252.06
loop_
_atom_site_label
_atom_site_type_symbol
_atom_site_fract_x
_atom_site_fract_y
_atom_site_fract_z
C1 C 0.47720 0.40229 0.59023
N2 N 0.48940 0.34350 0.47697
H*3 H 0.40977 0.33391 0.35833
N4 N 0.57924 0.41744 0.74850
H*5 H 0.66413 0.38301 0.77759
N6 N 0.36296 0.44593 0.54522
H*7 H 0.35769 0.48994 0.63477
N8 N 0.56397 0.47921 0.86450
N9 N 0.60984 0.29875 0.52716
H*10 H 0.64633 0.31652 0.44338
H*11 H 0.57999 0.44490 0.97663
H*12 H 0.62832 0.53332 0.89419
H*13 H 0.59800 0.22810 0.52583
N14 N 0.25779 0.42891 0.37903
H*15 H 0.18112 0.40123 0.39189
H*16 H 0.22945 0.48966 0.30945
C1+ C 0.34545 0.03666 0.25819
N'2+ N 0.22101 0.05437 0.22738
C3+ C 0.38361 -0.03713 0.17677
C4+ C 0.44732 -0.17561 0.02735
N'5+ N 0.22804 0.12680 0.32698
N'6+ N 0.35100 0.15631 0.42149
N7+ N 0.42726 0.10056 0.38014
N'8+ N 0.50753 -0.03768 0.19729
N9+ N 0.53638 -0.10826 0.12035
N10+ N 0.32292 -0.16802 0.00756
N'11+ N 0.28826 -0.10010 0.08249
O12+ O 0.55102 0.10865 0.44849
O13+ O 0.24035 -0.22927 -0.08591
O14+ O 0.64942 -0.11454 0.13020
N15+ N 0.48182 -0.24927 -0.04295
H*16+ H 0.40467 -0.28306 -0.13922
H*17+ H 0.56439 -0.23830 -0.05476

```

#END

```

data_3g_5
_symmetry_cell_setting      monoclinic
_symmetry_space_group_name_H-M 'P 21/a'

```

```

_symmetry_Int_Tables_number 14
loop_
_symmetry_equiv_pos_site_id
_symmetry_equiv_pos_as_xyz
1 x,y,z
2 1/2-x,1/2+y,-z
3 -x,-y,-z
4 1/2+x,1/2-y,z
_cell_length_a 12.119
_cell_length_b 28.013
_cell_length_c 3.924
_cell_angle_alpha 90.00
_cell_angle_beta 114.24
_cell_angle_gamma 90.00
_cell_volume 1214.71
loop_
_atom_site_label
_atom_site_type_symbol
_atom_site_fract_x
_atom_site_fract_y
_atom_site_fract_z
C1 C -0.23293 0.07539 -0.66100
N2 N -0.24824 0.02816 -0.64616
H*3 H -0.17547 0.00683 -0.59783
N4 N -0.32598 0.10511 -0.72399
H*5 H -0.40665 0.09043 -0.75903
N6 N -0.12457 0.09290 -0.61285
H*7 H -0.11668 0.12891 -0.62614
N8 N -0.30764 0.15433 -0.73820
N9 N -0.36239 0.01076 -0.69739
H*10 H -0.35635 -0.00741 -0.46557
H*11 H -0.36325 0.16739 -0.99345
H*12 H -0.32478 0.17128 -0.53546
H*13 H -0.39482 -0.01129 -0.92355
N14 N -0.02876 0.06108 -0.54741
H*15 H 0.00157 0.06424 -0.75298
H*16 H 0.04004 0.06812 -0.29499
C1+ C -0.25772 -0.13285 0.92862
N'2+ N -0.36695 -0.14165 0.93352
C3+ C -0.16286 -0.16764 1.00598
C4+ C 0.00861 -0.23271 1.16299
N'5+ N -0.42672 -0.10083 0.84888
N'6+ N -0.36115 -0.06602 0.79211
N7+ N -0.25385 -0.08536 0.84012
N'8+ N -0.06630 -0.15621 0.93246
N9+ N 0.01831 -0.18975 1.01441
N10+ N -0.09384 -0.24207 1.21596
N'11+ N -0.18079 -0.21002 1.14431
O12+ O -0.16863 -0.06178 0.81084
O13+ O -0.10306 -0.28305 1.33919
O14+ O 0.11169 -0.18274 0.95223
N15+ N 0.09942 -0.26541 1.25961

```

H\*16+ H 0.07357 -0.29904 1.28808  
H\*17+ H 0.15744 -0.25987 1.13721

#END

**S27.** Optimized crystal structure coordinates for 5 polymorphs of Ammonia - 5-nitrotetrazole 1*N*-oxide (cocrystal form).

```
data_1a_q_1
_symmetry_cell_setting      monoclinic
_symmetry_space_group_name_H-M 'P 21/a'
_symmetry_Int_Tables_number 14
loop_
_symmetry_equiv_pos_site_id
_symmetry_equiv_pos_as_xyz
1 x,y,z
2 1/2-x,1/2+y,-z
3 -x,-y,-z
4 1/2+x,1/2-y,z
_cell_length_a              13.018
_cell_length_b              8.384
_cell_length_c              5.859
_cell_angle_alpha           90.00
_cell_angle_beta            59.20
_cell_angle_gamma           90.00
_cell_volume                549.278
loop_
_atom_site_label
_atom_site_type_symbol
_atom_site_fract_x
_atom_site_fract_y
_atom_site_fract_z
N1 N 0.42946 0.18951 -0.26730
H*2 H 0.39130 0.29970 -0.21466
H*3 H 0.45368 0.15886 -0.13302
H*4 H 0.36392 0.11217 -0.24133
C1+ C -0.15449 -0.27122 0.78229
N2+ N -0.17100 -0.15330 0.64747
N'3+ N -0.24011 -0.20668 0.55854
N'4+ N -0.26522 -0.35572 0.63889
N'5+ N -0.21353 -0.39845 0.77723
O6+ O -0.12786 -0.00167 0.60018
N7+ N -0.08407 -0.25969 0.91016
O8+ O -0.07921 -0.37890 1.02327
O9+ O -0.03605 -0.13052 0.89195
H*10+ H -0.15996 0.04484 0.49691
```

#END

```
data_1a_q_2
_symmetry_cell_setting      monoclinic
_symmetry_space_group_name_H-M 'P 21/c'
```

```

_symmetry_Int_Tables_number 14
loop_
_symmetry_equiv_pos_site_id
_symmetry_equiv_pos_as_xyz
1 x,y,z
2 -x,1/2+y,1/2-z
3 -x,-y,-z
4 x,1/2-y,1/2+z
_cell_length_a 7.730
_cell_length_b 6.642
_cell_length_c 10.956
_cell_angle_alpha 90.00
_cell_angle_beta 99.39
_cell_angle_gamma 90.00
_cell_volume 554.973
loop_
_atom_site_label
_atom_site_type_symbol
_atom_site_fract_x
_atom_site_fract_y
_atom_site_fract_z
N1 N 0.70053 0.80451 0.60261
H*2 H 0.81142 0.72037 0.62487
H*3 H 0.64370 0.76243 0.51585
H*4 H 0.61731 0.76208 0.66111
C1+ C -0.20420 0.22934 0.64855
N2+ N -0.27450 0.19050 0.75103
N'3+ N -0.43662 0.26285 0.73573
N'4+ N -0.46422 0.34482 0.62488
N'5+ N -0.32301 0.32621 0.56920
O6+ O -0.20186 0.09452 0.85665
N7+ N -0.02864 0.17402 0.62933
O8+ O 0.01245 0.22175 0.53054
O9+ O 0.06179 0.08420 0.71473
H*10+ H -0.29438 0.09750 0.90746

```

#END

```

data_1a_q_3
_symmetry_cell_setting monoclinic
_symmetry_space_group_name_H-M 'P 21/a'
_symmetry_Int_Tables_number 14
loop_
_symmetry_equiv_pos_site_id
_symmetry_equiv_pos_as_xyz
1 x,y,z
2 1/2-x,1/2+y,-z
3 -x,-y,-z
4 1/2+x,1/2-y,z
_cell_length_a 8.941
_cell_length_b 14.808
_cell_length_c 5.814

```

```

_cell_angle_alpha      90.00
_cell_angle_beta      133.02
_cell_angle_gamma     90.00
_cell_volume          562.786
loop_
_atom_site_label
_atom_site_type_symbol
_atom_site_fract_x
_atom_site_fract_y
_atom_site_fract_z
N1 N -0.22973 0.39546 0.56300
H*2 H -0.18116 0.42381 0.76404
H*3 H -0.18804 0.43827 0.47775
H*4 H -0.14783 0.33755 0.62692
C1+ C -0.16197 0.15024 0.10719
N2+ N -0.19352 0.11495 -0.13697
N'3+ N -0.26722 0.03191 -0.19211
N'4+ N -0.28018 0.01705 0.01701
N'5+ N -0.21624 0.08893 0.20434
O6+ O -0.16012 0.15281 -0.31166
N7+ N -0.08229 0.23993 0.23914
O8+ O -0.06400 0.26030 0.46035
O9+ O -0.04089 0.28676 0.11471
H*10+ H -0.20196 0.10581 -0.46330

```

#END

```

data_1a_q_4
_symmetry_cell_setting      monoclinic
_symmetry_space_group_name_H-M 'P 21/a'
_symmetry_Int_Tables_number 14
loop_
_symmetry_equiv_pos_site_id
_symmetry_equiv_pos_as_xyz
1 x,y,z
2 1/2-x,1/2+y,-z
3 -x,-y,-z
4 1/2+x,1/2-y,z
_cell_length_a      8.772
_cell_length_b      10.621
_cell_length_c      10.814
_cell_angle_alpha   90.00
_cell_angle_beta    34.56
_cell_angle_gamma   90.00
_cell_volume        571.53
loop_
_atom_site_label
_atom_site_type_symbol
_atom_site_fract_x
_atom_site_fract_y
_atom_site_fract_z
N1 N 0.43014 0.55348 0.80380

```

H\*2 H 0.40495 0.49562 0.74635  
H\*3 H 0.60761 0.52899 0.72564  
H\*4 H 0.45366 0.64238 0.75433  
C1+ C -0.09019 0.51551 0.27296  
N2+ N 0.01970 0.59645 0.28139  
N'3+ N -0.04033 0.71333 0.28804  
N'4+ N -0.18540 0.70320 0.28367  
N'5+ N -0.21907 0.58225 0.27437  
O6+ O 0.16965 0.57149 0.28343  
N7+ N -0.06976 0.37902 0.26393  
O8+ O -0.18244 0.32092 0.25703  
O9+ O 0.05949 0.33515 0.26413  
H\*10+ H 0.20955 0.65470 0.29026

#END

data\_1a\_q\_5  
\_symmetry\_cell\_setting orthorhombic  
\_symmetry\_space\_group\_name\_H-M 'P b c a'  
\_symmetry\_Int\_Tables\_number 61  
loop\_  
\_symmetry\_equiv\_pos\_site\_id  
\_symmetry\_equiv\_pos\_as\_xyz  
1 x,y,z  
2 1/2-x,1/2+y,z  
3 x,1/2-y,1/2+z  
4 1/2-x,-y,1/2+z  
5 -x,-y,-z  
6 1/2+x,1/2-y,-z  
7 -x,1/2+y,1/2-z  
8 1/2+x,y,1/2-z  
\_cell\_length\_a 10.629  
\_cell\_length\_b 8.744  
\_cell\_length\_c 12.270  
\_cell\_angle\_alpha 90.00  
\_cell\_angle\_beta 90.00  
\_cell\_angle\_gamma 90.00  
\_cell\_volume 1140.37  
loop\_  
\_atom\_site\_label  
\_atom\_site\_type\_symbol  
\_atom\_site\_fract\_x  
\_atom\_site\_fract\_y  
\_atom\_site\_fract\_z  
N1 N 0.44774 0.74873 -0.15520  
H\*2 H 0.50480 0.66221 -0.12964  
H\*3 H 0.35829 0.71975 -0.13360  
H\*4 H 0.47121 0.84302 -0.11081  
C1+ C -0.01560 -0.32695 0.38610  
N2+ N -0.09653 -0.20881 0.39582  
N'3+ N -0.21285 -0.26308 0.40284  
N'4+ N -0.20239 -0.41286 0.39741

N'5+ N -0.08179 -0.45520 0.38708  
O6+ O -0.07203 -0.05624 0.39871  
N7+ N 0.12036 -0.31466 0.37632  
O8+ O 0.17854 -0.43421 0.36826  
O9+ O 0.16375 -0.18457 0.37710  
H\*10+ H -0.15505 -0.00991 0.40636

#END

**S28.** Optimized crystal structure coordinates for 5 polymorphs of Hydroxylamine - 5-nitrotetrazole 1*N*-oxide (cocrystal form).

```
data_1b_q_1
_symmetry_cell_setting      orthorhombic
_symmetry_space_group_name_H-M 'P n a 21'
_symmetry_Int_Tables_number 33
loop_
_symmetry_equiv_pos_site_id
_symmetry_equiv_pos_as_xyz
1 x,y,z
2 1/2-x,1/2+y,1/2+z
3 1/2+x,1/2-y,z
4 -x,-y,1/2+z
_cell_length_a              8.753
_cell_length_b              5.408
_cell_length_c              12.262
_cell_angle_alpha           90.00
_cell_angle_beta            90.00
_cell_angle_gamma           90.00
_cell_volume                 580.437
loop_
_atom_site_label
_atom_site_type_symbol
_atom_site_fract_x
_atom_site_fract_y
_atom_site_fract_z
N1 N 0.62506 0.32067 -0.09121
H*2 H 0.67631 0.15385 -0.10522
H*3 H 0.54327 0.28777 -0.03351
O4 O 0.53853 0.36630 -0.18959
H*5 H 0.57572 0.52607 -0.21247
C1+ C -0.14825 0.55147 0.06988
N2+ N -0.23991 0.59704 0.15607
N'3+ N -0.22327 0.41699 0.22864
N'4+ N -0.12235 0.26370 0.18670
N'5+ N -0.07431 0.34232 0.08888
O6+ O -0.33687 0.78963 0.17311
N7+ N -0.13383 0.70589 -0.02665
O8+ O -0.04502 0.63520 -0.09654
O9+ O -0.21277 0.89342 -0.02856
H*10+ H -0.38132 0.75434 0.24438
```

#END

```
data_1b_q_2
_symmetry_cell_setting      orthorhombic
_symmetry_space_group_name_H-M 'P b c a'
_symmetry_Int_Tables_number 61
loop_
_symmetry_equiv_pos_site_id
_symmetry_equiv_pos_as_xyz
1 x,y,z
2 1/2-x,1/2+y,z
3 x,1/2-y,1/2+z
4 1/2-x,-y,1/2+z
5 -x,-y,-z
6 1/2+x,1/2-y,-z
7 -x,1/2+y,1/2-z
8 1/2+x,y,1/2-z
_cell_length_a              9.753
_cell_length_b              14.812
_cell_length_c              8.304
_cell_angle_alpha           90.00
_cell_angle_beta            90.00
_cell_angle_gamma           90.00
_cell_volume                1199.61
loop_
_atom_site_label
_atom_site_type_symbol
_atom_site_fract_x
_atom_site_fract_y
_atom_site_fract_z
N1 N 0.56359 0.49864 0.32208
H*2 H 0.60001 0.44555 0.25609
H*3 H 0.61212 0.49476 0.43096
O4 O 0.42367 0.47349 0.35796
H*5 H 0.37216 0.52426 0.31742
C1+ C 0.79646 0.16130 0.09292
N2+ N 0.81579 0.25095 0.11103
N'3+ N 0.72499 0.28245 0.21596
N'4+ N 0.65130 0.21242 0.26099
N'5+ N 0.69326 0.13692 0.18693
O6+ O 0.90961 0.30563 0.03922
N7+ N 0.87553 0.10226 -0.01172
O8+ O 0.84332 0.02277 -0.01254
O9+ O 0.96753 0.13823 -0.08954
H*10+ H 0.88982 0.36507 0.08415
```

#END

```
data_1b_q_3
_symmetry_cell_setting      monoclinic
_symmetry_space_group_name_H-M 'P 21/c'
_symmetry_Int_Tables_number 14
```

```

loop_
_symmetry_equiv_pos_site_id
_symmetry_equiv_pos_as_xyz
1 x,y,z
2 -x,1/2+y,1/2-z
3 -x,-y,-z
4 x,1/2-y,1/2+z
_cell_length_a          4.508
_cell_length_b          13.218
_cell_length_c          10.779
_cell_angle_alpha       90.00
_cell_angle_beta        70.33
_cell_angle_gamma       90.00
_cell_volume            604.806
loop_
_atom_site_label
_atom_site_type_symbol
_atom_site_fract_x
_atom_site_fract_y
_atom_site_fract_z
N1 N -0.26054 -0.29944 0.23386
H*2 H -0.15133 -0.25068 0.27821
H*3 H -0.42562 -0.33663 0.30893
O4 O -0.02442 -0.37566 0.17606
H*5 H -0.01020 -0.37489 0.08470
C1+ C 0.36532 -0.11266 0.19807
N2+ N 0.51843 -0.04516 0.24856
N'3+ N 0.38574 -0.04373 0.37870
N'4+ N 0.15419 -0.10984 0.40676
N'5+ N 0.13653 -0.15339 0.29716
O6+ O 0.76857 0.01475 0.18486
N7+ N 0.43992 -0.13615 0.05909
O8+ O 0.27536 -0.19944 0.03170
O9+ O 0.66234 -0.08982 -0.01769
H*10+ H 0.80778 0.05205 0.25589

```

#END

```

data_1b_q_4
_symmetry_cell_setting    monoclinic
_symmetry_space_group_name_H-M 'P 21/a'
_symmetry_Int_Tables_number 14
loop_
_symmetry_equiv_pos_site_id
_symmetry_equiv_pos_as_xyz
1 x,y,z
2 1/2-x,1/2+y,-z
3 -x,-y,-z
4 1/2+x,1/2-y,z
_cell_length_a          12.017
_cell_length_b          8.743
_cell_length_c          5.619

```

```

_cell_angle_alpha      90.00
_cell_angle_beta      92.33
_cell_angle_gamma     90.00
_cell_volume          589.87
loop_
_atom_site_label
_atom_site_type_symbol
_atom_site_fract_x
_atom_site_fract_y
_atom_site_fract_z
N1 N 0.32497 0.46679 -0.23877
H*2 H 0.32946 0.37322 -0.34699
H*3 H 0.38199 0.44815 -0.10191
O4 O 0.21882 0.45000 -0.12947
H*5 H 0.18217 0.54554 -0.16817
C1+ C 0.06501 0.23638 0.51024
N2+ N 0.11249 0.32792 0.34975
N'3+ N 0.03302 0.39473 0.21583
N'4+ N -0.06180 0.34401 0.29464
N'5+ N -0.04441 0.24624 0.47606
O6+ O 0.22228 0.35465 0.31703
N7+ N 0.12419 0.14351 0.68886
O8+ O 0.06723 0.06769 0.81917
O9+ O 0.22625 0.15035 0.69139
H*10+ H 0.22164 0.42692 0.18473

```

#END

```

data_1b_q_5
_symmetry_cell_setting      monoclinic
_symmetry_space_group_name_H-M 'P 21/c'
_symmetry_Int_Tables_number 14
loop_
_symmetry_equiv_pos_site_id
_symmetry_equiv_pos_as_xyz
1 x,y,z
2 -x,1/2+y,1/2-z
3 -x,-y,-z
4 x,1/2-y,1/2+z
_cell_length_a              10.081
_cell_length_b              5.079
_cell_length_c              14.743
_cell_angle_alpha           90.00
_cell_angle_beta            50.76
_cell_angle_gamma           90.00
_cell_volume                 584.643
loop_
_atom_site_label
_atom_site_type_symbol
_atom_site_fract_x
_atom_site_fract_y
_atom_site_fract_z

```

```

N1 N -0.42836 -0.02601 0.66320
H*2 H -0.49685 0.13355 0.67114
H*3 H -0.49556 -0.18721 0.67090
O4 O -0.45250 -0.02543 0.77086
H*5 H -0.33644 -0.02414 0.74319
C1+ C 0.13775 0.62685 0.11147
N2+ N 0.11191 0.80675 0.05667
N'3+ N -0.03818 0.76060 0.08244
N'4+ N -0.10265 0.55442 0.15227
N'5+ N 0.00326 0.46818 0.17155
O6+ O 0.21467 1.00841 -0.01460
N7+ N 0.28741 0.61125 0.10520
O8+ O 0.28853 0.43485 0.16074
O9+ O 0.39877 0.77785 0.04435
H*10+ H 0.15043 1.09114 -0.03589

```

#END

**S29.** Optimized crystal structure coordinates for 5 polymorphs of Hydrazine - 5-nitrotetrazole 1*N*-oxide (cocrystal form).

```

data_l c_q_1
_symmetry_cell_setting      monoclinic
_symmetry_space_group_name_H-M 'P 21/a'
_symmetry_Int_Tables_number 14
loop_
_symmetry_equiv_pos_site_id
_symmetry_equiv_pos_as_xyz
1 x,y,z
2 1/2-x,1/2+y,-z
3 -x,-y,-z
4 1/2+x,1/2-y,z
_cell_length_a              11.092
_cell_length_b              11.866
_cell_length_c              5.650
_cell_angle_alpha           90.00
_cell_angle_beta            120.34
_cell_angle_gamma           90.00
_cell_volume                 641.793
loop_
_atom_site_label
_atom_site_type_symbol
_atom_site_fract_x
_atom_site_fract_y
_atom_site_fract_z
N1 N 0.63548 -0.08371 0.49591
H*2 H 0.58628 -0.01211 0.39206
H*3 H 0.59343 -0.10632 0.61249
N4 N 0.78249 -0.06627 0.67743
H*5 H 0.83140 -0.08231 0.56980
H*6 H 0.80457 0.01485 0.74593
C1+ C 0.53761 0.26718 -0.08302

```

N2+ N 0.43979 0.26815 -0.00801  
N'3+ N 0.46650 0.18564 0.17042  
N'4+ N 0.57958 0.13513 0.20313  
N'5+ N 0.62551 0.18376 0.04921  
O6+ O 0.32879 0.33839 -0.09008  
N7+ N 0.54457 0.34448 -0.27547  
O8+ O 0.64073 0.33081 -0.31848  
O9+ O 0.45259 0.41639 -0.37665  
H\*10+ H 0.28434 0.31136 0.01046

#END

data\_1c\_q\_2  
\_symmetry\_cell\_setting monoclinic  
\_symmetry\_space\_group\_name\_H-M 'P 21/a'  
\_symmetry\_Int\_Tables\_number 14  
loop\_  
\_symmetry\_equiv\_pos\_site\_id  
\_symmetry\_equiv\_pos\_as\_xyz  
1 x,y,z  
2 1/2-x,1/2+y,-z  
3 -x,-y,-z  
4 1/2+x,1/2-y,z  
\_cell\_length\_a 8.880  
\_cell\_length\_b 20.242  
\_cell\_length\_c 6.300  
\_cell\_angle\_alpha 90.00  
\_cell\_angle\_beta 32.80  
\_cell\_angle\_gamma 90.00  
\_cell\_volume 613.44  
loop\_  
\_atom\_site\_label  
\_atom\_site\_type\_symbol  
\_atom\_site\_fract\_x  
\_atom\_site\_fract\_y  
\_atom\_site\_fract\_z  
N1 N 0.21032 -0.39291 -0.53410  
H\*2 H 0.34901 -0.43057 -0.71763  
H\*3 H 0.26331 -0.36800 -0.46270  
N4 N -0.06886 -0.41668 -0.17632  
H\*5 H -0.15569 -0.42051 -0.22007  
H\*6 H -0.07380 -0.46234 -0.10205  
C1+ C 0.50823 0.63649 -0.35639  
N2+ N 0.68620 0.67127 -0.44500  
N'3+ N 0.69492 0.73318 -0.52427  
N'4+ N 0.52361 0.73586 -0.48396  
N'5+ N 0.40584 0.67692 -0.38061  
O6+ O 0.83997 0.65070 -0.45859  
N7+ N 0.44166 0.56684 -0.25276  
O8+ O 0.27556 0.54369 -0.18164  
O9+ O 0.55951 0.53789 -0.24676  
H\*10+ H 0.93999 0.69036 -0.53342

#END

```
data_1c_q_3
_symmetry_cell_setting      orthorhombic
_symmetry_space_group_name_H-M 'P b c a'
_symmetry_Int_Tables_number 61
loop_
_symmetry_equiv_pos_site_id
_symmetry_equiv_pos_as_xyz
1 x,y,z
2 1/2-x,1/2+y,z
3 x,1/2-y,1/2+z
4 1/2-x,-y,1/2+z
5 -x,-y,-z
6 1/2+x,1/2-y,-z
7 -x,1/2+y,1/2-z
8 1/2+x,y,1/2-z
_cell_length_a             12.124
_cell_length_b             11.060
_cell_length_c             9.516
_cell_angle_alpha          90.00
_cell_angle_beta           90.00
_cell_angle_gamma          90.00
_cell_volume               1276.01
loop_
_atom_site_label
_atom_site_type_symbol
_atom_site_fract_x
_atom_site_fract_y
_atom_site_fract_z
N1 N -0.07462 -0.05466 0.34342
H*2 H -0.00274 -0.08943 0.38177
H*3 H -0.10060 -0.10942 0.26424
N4 N -0.05985 0.06435 0.28592
H*5 H -0.07175 0.12474 0.36504
H*6 H 0.01796 0.07689 0.24781
C1+ C 0.79366 0.14587 0.05246
N2+ N 0.78132 0.26391 0.08482
N'3+ N 0.69735 0.27585 0.17318
N'4+ N 0.65917 0.16592 0.19413
N'5+ N 0.71708 0.08413 0.12094
O6+ O 0.84074 0.36072 0.03984
N7+ N 0.87670 0.09592 -0.04127
O8+ O 0.87533 -0.01330 -0.05806
O9+ O 0.94050 0.16877 -0.09475
H*10+ H 0.80596 0.42912 0.08702
```

#END

```
data_1c_q_4
_symmetry_cell_setting      orthorhombic
```

```

_symmetry_space_group_name_H-M 'P 21 21 21'
_symmetry_Int_Tables_number 19
loop_
_symmetry_equiv_pos_site_id
_symmetry_equiv_pos_as_xyz
1 x,y,z
2 1/2+x,1/2-y,-z
3 -x,1/2+y,1/2-z
4 1/2-x,-y,1/2+z
_cell_length_a 10.477
_cell_length_b 9.284
_cell_length_c 6.515
_cell_angle_alpha 90.00
_cell_angle_beta 90.00
_cell_angle_gamma 90.00
_cell_volume 633.704

```

```

loop_
_atom_site_label
_atom_site_type_symbol
_atom_site_fract_x
_atom_site_fract_y
_atom_site_fract_z
N1 N 0.71910 0.05985 0.58765
H*2 H 0.76706 0.07247 0.45257
H*3 H 0.69013 -0.04449 0.59647
N4 N 0.60715 0.14892 0.59765
H*5 H 0.63348 0.24517 0.65890
H*6 H 0.56960 0.16829 0.45585
C1+ C 0.11117 -0.12527 0.38979
N2+ N 0.04390 -0.05647 0.53675
N'3+ N 0.01405 -0.14965 0.68357
N'4+ N 0.06287 -0.27386 0.62591
N'5+ N 0.12323 -0.26177 0.44535
O6+ O 0.00809 0.08414 0.54638
N7+ N 0.16131 -0.06019 0.20348
O8+ O 0.22000 -0.13932 0.08788
O9+ O 0.13968 0.06873 0.18028
H*10+ H -0.03859 0.09055 0.67562

```

#END

```

data_1c_q_5
_symmetry_cell_setting monoclinic
_symmetry_space_group_name_H-M 'P 21/c'
_symmetry_Int_Tables_number 14
loop_
_symmetry_equiv_pos_site_id
_symmetry_equiv_pos_as_xyz
1 x,y,z
2 -x,1/2+y,1/2-z
3 -x,-y,-z
4 x,1/2-y,1/2+z

```

```

_cell_length_a      5.978
_cell_length_b     10.202
_cell_length_c     11.454
_cell_angle_alpha   90.00
_cell_angle_beta   115.45
_cell_angle_gamma   90.00
_cell_volume       630.764
loop_
_atom_site_label
_atom_site_type_symbol
_atom_site_fract_x
_atom_site_fract_y
_atom_site_fract_z
N1 N 0.24447 0.92879 0.20673
H*2 H 0.38177 0.90234 0.18104
H*3 H 0.16867 1.01370 0.15998
N4 N 0.33767 0.95314 0.34310
H*5 H 0.33342 0.86682 0.38648
H*6 H 0.51668 0.98517 0.38210
C1+ C -0.08908 0.70143 0.11678
N2+ N -0.16707 0.73496 0.20719
N'3+ N -0.37541 0.80328 0.15141
N'4+ N -0.42312 0.81104 0.02823
N'5+ N -0.24947 0.74906 0.00433
O6+ O -0.06255 0.70788 0.33592
N7+ N 0.13248 0.62617 0.13959
O8+ O 0.17367 0.60518 0.04590
O9+ O 0.25738 0.59081 0.25144
H*10+ H -0.17471 0.74899 0.36661

```

#END

**S30.** Optimized crystal structure coordinates for 5 polymorphs of Guanidine - 5-nitrotetrazole 1*N*-oxide (cocrystal form).

```

data_1d_q_1
_symmetry_cell_setting      monoclinic
_symmetry_space_group_name_H-M 'P 21/c'
_symmetry_Int_Tables_number 14
loop_
_symmetry_equiv_pos_site_id
_symmetry_equiv_pos_as_xyz
1 x,y,z
2 -x,1/2+y,1/2-z
3 -x,-y,-z
4 x,1/2-y,1/2+z
_cell_length_a      7.403
_cell_length_b     14.650
_cell_length_c     7.567
_cell_angle_alpha   90.00
_cell_angle_beta   69.18
_cell_angle_gamma   90.00

```

```

_cell_volume          767.083
loop_
_atom_site_label
_atom_site_type_symbol
_atom_site_fract_x
_atom_site_fract_y
_atom_site_fract_z
C1 C 0.31524 0.44984 0.36568
N'2 N 0.26337 0.52427 0.45991
H*3 H 0.28751 0.52159 0.58445
N4 N 0.27462 0.43563 0.20145
H*5 H 0.38161 0.40500 0.09455
H*6 H 0.22313 0.49269 0.16014
N7 N 0.41479 0.37650 0.40677
H*8 H 0.42407 0.37890 0.53688
H*9 H 0.37657 0.31402 0.37429
C1+ C -0.06660 0.16585 0.43112
N2+ N -0.14072 0.24949 0.48838
N'3+ N -0.32917 0.24800 0.52149
N'4+ N -0.36877 0.16413 0.48455
N'5+ N -0.20943 0.11211 0.42857
O6+ O -0.04943 0.32647 0.51240
N7+ N 0.13499 0.13982 0.38119
O8+ O 0.17562 0.06088 0.33242
O9+ O 0.24544 0.20004 0.39297
H*10+ H -0.15283 0.37161 0.55471

```

#END

```

data_1d_q_2
_symmetry_cell_setting      monoclinic
_symmetry_space_group_name_H-M 'P 21/a'
_symmetry_Int_Tables_number 14
loop_
_symmetry_equiv_pos_site_id
_symmetry_equiv_pos_as_xyz
1 x,y,z
2 1/2-x,1/2+y,-z
3 -x,-y,-z
4 1/2+x,1/2-y,z
_cell_length_a             13.200
_cell_length_b             8.917
_cell_length_c             7.241
_cell_angle_alpha          90.00
_cell_angle_beta           121.69
_cell_angle_gamma          90.00
_cell_volume               725.222
loop_
_atom_site_label
_atom_site_type_symbol
_atom_site_fract_x
_atom_site_fract_y

```

```

_atom_site_fract_z
C1 C 0.69340 -0.38349 0.78073
N'2 N 0.58987 -0.32303 0.69367
H*3 H 0.58908 -0.21840 0.63585
N4 N 0.71683 -0.51948 0.89093
H*5 H 0.76765 -0.59205 0.86613
H*6 H 0.64195 -0.56717 0.87059
N7 N 0.79217 -0.32887 0.77872
H*8 H 0.78368 -0.22188 0.72605
H*9 H 0.87207 -0.34915 0.91539
C1+ C 0.19667 0.87049 0.27458
N2+ N 0.11208 0.95185 0.28013
N'3+ N 0.01159 0.87363 0.18771
N'4+ N 0.03517 0.74597 0.12673
N'5+ N 0.14864 0.74119 0.17837
O6+ O 0.11998 1.09123 0.36282
N7+ N 0.31894 0.91738 0.35970
O8+ O 0.38300 0.82875 0.34021
O9+ O 0.34610 1.04222 0.44339
H*10+ H 0.04025 1.10949 0.33497

```

#END

```

data_1d_q_3
_symmetry_cell_setting      triclinic
_symmetry_space_group_name_H-M 'P -1'
_symmetry_Int_Tables_number 2
loop_
_symmetry_equiv_pos_site_id
_symmetry_equiv_pos_as_xyz
1 x,y,z
2 -x,-y,-z
_cell_length_a              7.092
_cell_length_b              12.779
_cell_length_c              6.712
_cell_angle_alpha           122.17
_cell_angle_beta            58.72
_cell_angle_gamma           132.96
_cell_volume                 364.622
loop_
_atom_site_label
_atom_site_type_symbol
_atom_site_fract_x
_atom_site_fract_y
_atom_site_fract_z
C1 C -0.12821 0.70183 0.11114
N'2 N -0.28612 0.74534 0.25548
H*3 H -0.47098 0.66092 0.31788
N4 N 0.12487 0.79540 -0.01510
H*5 H 0.27138 0.79375 -0.02714
H*6 H 0.17129 0.89999 0.04244
N7 N -0.17725 0.56504 0.06116

```

H\*8 H -0.36932 0.48734 0.12341  
H\*9 H -0.09577 0.52401 -0.11219  
C1+ C -0.12830 -0.25465 0.63841  
N2+ N -0.01342 -0.11026 0.67122  
N'3+ N -0.19355 -0.07734 0.81582  
N'4+ N -0.41565 -0.20082 0.87009  
N'5+ N -0.38082 -0.31179 0.76304  
O6+ O 0.24197 -0.00721 0.57938  
N7+ N 0.00346 -0.33298 0.49163  
O8+ O -0.13245 -0.46375 0.48310  
O9+ O 0.23989 -0.25966 0.38991  
H\*10+ H 0.24447 0.08257 0.64559

#END

data\_1d\_q\_4  
\_symmetry\_cell\_setting monoclinic  
\_symmetry\_space\_group\_name\_H-M 'C 2/c'  
\_symmetry\_Int\_Tables\_number 15  
loop\_  
\_symmetry\_equiv\_pos\_site\_id  
\_symmetry\_equiv\_pos\_as\_xyz  
1 x,y,z  
2 -x,y,1/2-z  
3 -x,-y,-z  
4 x,-y,1/2+z  
5 1/2+x,1/2+y,z  
6 1/2-x,1/2+y,1/2-z  
7 1/2-x,1/2-y,-z  
8 1/2+x,1/2-y,1/2+z  
\_cell\_length\_a 15.963  
\_cell\_length\_b 4.573  
\_cell\_length\_c 20.456  
\_cell\_angle\_alpha 90.00  
\_cell\_angle\_beta 105.26  
\_cell\_angle\_gamma 90.00  
\_cell\_volume 1440.61  
loop\_  
\_atom\_site\_label  
\_atom\_site\_type\_symbol  
\_atom\_site\_fract\_x  
\_atom\_site\_fract\_y  
\_atom\_site\_fract\_z  
C1 C 0.03409 0.57372 -0.10665  
N'2 N -0.00130 0.33123 -0.09672  
H\*3 H 0.03154 0.23641 -0.05219  
N4 N 0.00499 0.72153 -0.16807  
H\*5 H 0.00188 0.94201 -0.16414  
H\*6 H -0.05023 0.63295 -0.19766  
N7 N 0.10178 0.72113 -0.06121  
H\*8 H 0.13208 0.60295 -0.01996  
H\*9 H 0.14378 0.82652 -0.08261

C1+ C 0.27038 -0.20846 0.64685  
N2+ N 0.19339 -0.06861 0.62698  
N'3+ N 0.14681 -0.18757 0.56975  
N'4+ N 0.19522 -0.39772 0.55510  
N'5+ N 0.27171 -0.41519 0.60182  
O6+ O 0.16285 0.15798 0.65709  
N7+ N 0.33945 -0.14244 0.70720  
O8+ O 0.40469 -0.29240 0.71706  
O9+ O 0.32542 0.05878 0.74261  
H\*10+ H 0.10528 0.19454 0.62713

#END

data\_1d\_q\_5  
\_symmetry\_cell\_setting triclinic  
\_symmetry\_space\_group\_name\_H-M 'P -1'  
\_symmetry\_Int\_Tables\_number 2  
loop\_  
\_symmetry\_equiv\_pos\_site\_id  
\_symmetry\_equiv\_pos\_as\_xyz  
1 x,y,z  
2 -x,-y,-z  
\_cell\_length\_a 6.017  
\_cell\_length\_b 10.691  
\_cell\_length\_c 7.378  
\_cell\_angle\_alpha 113.44  
\_cell\_angle\_beta 64.31  
\_cell\_angle\_gamma 119.41  
\_cell\_volume 362.094  
loop\_  
\_atom\_site\_label  
\_atom\_site\_type\_symbol  
\_atom\_site\_fract\_x  
\_atom\_site\_fract\_y  
\_atom\_site\_fract\_z  
C1 C 0.67492 0.71868 0.47027  
N'2 N 0.81039 0.64116 0.33437  
H\*3 H 1.00713 0.69396 0.32863  
N4 N 0.40820 0.67386 0.48648  
H\*5 H 0.28551 0.68870 0.63320  
H\*6 H 0.33642 0.57083 0.39877  
N7 N 0.76296 0.84988 0.61498  
H\*8 H 0.96296 0.89596 0.59028  
H\*9 H 0.68547 0.92436 0.64670  
C1+ C 0.30864 0.19769 -0.06338  
N2+ N 0.44097 0.32483 0.05314  
N'3+ N 0.27404 0.39129 0.18423  
N'4+ N 0.04254 0.30506 0.14734  
N'5+ N 0.05847 0.18498 -0.00458  
O6+ O 0.70108 0.38407 0.04843  
N7+ N 0.42227 0.09347 -0.22491  
O8+ O 0.27197 -0.01590 -0.31429

O9+ O 0.65961 0.12568 -0.25598  
H\*10+ H 0.71751 0.47564 0.15580

#END

**S31.** Optimized crystal structure coordinates for 5 polymorphs of Aminoguanidine - 5-nitrotetrazole 1*N*-oxide (cocrystal form).

```
data_le_q_1
_symmetry_cell_setting      monoclinic
_symmetry_space_group_name_H-M 'P 21/a'
_symmetry_Int_Tables_number 14
loop_
_symmetry_equiv_pos_site_id
_symmetry_equiv_pos_as_xyz
1 x,y,z
2 1/2-x,1/2+y,-z
3 -x,-y,-z
4 1/2+x,1/2-y,z
_cell_length_a              12.351
_cell_length_b              9.338
_cell_length_c              6.945
_cell_angle_alpha           90.00
_cell_angle_beta            104.57
_cell_angle_gamma           90.00
_cell_volume                 775.233
loop_
_atom_site_label
_atom_site_type_symbol
_atom_site_fract_x
_atom_site_fract_y
_atom_site_fract_z
C1 C 0.63221 0.20552 0.77032
N2 N 0.55704 0.31892 0.71823
H*3 H 0.49334 0.29908 0.59695
N'4 N 0.73848 0.23165 0.81657
N5 N 0.58336 0.07174 0.76630
H*6 H 0.50890 0.07179 0.80267
H*7 H 0.63918 -0.00127 0.84236
N8 N 0.80305 0.10406 0.88737
H*9 H 0.82910 0.06342 0.76984
H*10 H 0.87411 0.13997 0.98399
H*11 H 0.59695 0.41198 0.70515
C1+ C 0.32478 -0.22275 0.71668
N2+ N 0.29451 -0.08513 0.73155
N'3+ N 0.18618 -0.07128 0.64572
N'4+ N 0.15117 -0.19950 0.57945
N'5+ N 0.23496 -0.29481 0.62126
O6+ O 0.35816 0.02782 0.81714
N7+ N 0.43662 -0.28092 0.79254
O8+ O 0.44836 -0.40827 0.76529
O9+ O 0.50881 -0.19591 0.87710
```

H\*10+ H 0.30545 0.10754 0.79658

#END

data\_le\_q\_2

\_symmetry\_cell\_setting monoclinic  
\_symmetry\_space\_group\_name\_H-M 'P 21/a'  
\_symmetry\_Int\_Tables\_number 14  
loop\_  
\_symmetry\_equiv\_pos\_site\_id  
\_symmetry\_equiv\_pos\_as\_xyz  
1 x,y,z  
2 1/2-x,1/2+y,-z  
3 -x,-y,-z  
4 1/2+x,1/2-y,z  
\_cell\_length\_a 12.465  
\_cell\_length\_b 9.261  
\_cell\_length\_c 7.961  
\_cell\_angle\_alpha 90.00  
\_cell\_angle\_beta 56.91  
\_cell\_angle\_gamma 90.00  
\_cell\_volume 769.955

loop\_

\_atom\_site\_label  
\_atom\_site\_type\_symbol  
\_atom\_site\_fract\_x  
\_atom\_site\_fract\_y  
\_atom\_site\_fract\_z  
C1 C 0.24850 0.71091 0.24656  
N2 N 0.20301 0.82534 0.18842  
H\*3 H 0.19727 0.80262 0.06888  
N'4 N 0.33337 0.73583 0.28876  
N5 N 0.19636 0.57750 0.25264  
H\*6 H 0.10431 0.58116 0.29135  
H\*7 H 0.21247 0.50524 0.33284  
N8 N 0.35864 0.60815 0.36702  
H\*9 H 0.44000 0.56196 0.25027  
H\*10 H 0.38432 0.64589 0.46039  
H\*11 H 0.25290 0.91736 0.16799  
C1+ C -0.04208 0.26779 0.23766  
N2+ N -0.07904 0.40554 0.24258  
N'3+ N -0.14461 0.41216 0.15604  
N'4+ N -0.14730 0.27949 0.09920  
N'5+ N -0.08479 0.18841 0.14773  
O6+ O -0.05739 0.52467 0.31978  
N7+ N 0.03172 0.21638 0.31746  
O8+ O 0.05637 0.08780 0.29945  
O9+ O 0.06228 0.30772 0.39563  
H\*10+ H -0.09947 0.60203 0.29355

#END

```

data_1e_q_3
_symmetry_cell_setting      triclinic
_symmetry_space_group_name_H-M 'P -1'
_symmetry_Int_Tables_number 2
loop_
_symmetry_equiv_pos_site_id
_symmetry_equiv_pos_as_xyz
1 x,y,z
2 -x,-y,-z
_cell_length_a              11.455
_cell_length_b              7.519
_cell_length_c              5.219
_cell_angle_alpha           65.48
_cell_angle_beta            89.56
_cell_angle_gamma           78.04
_cell_volume                 398.545
loop_
_atom_site_label
_atom_site_type_symbol
_atom_site_fract_x
_atom_site_fract_y
_atom_site_fract_z
C1 C 0.69886 -0.22632 0.56585
N2 N 0.59407 -0.25879 0.47599
H*3 H 0.53857 -0.30548 0.63081
N'4 N 0.80014 -0.29208 0.48863
N5 N 0.68292 -0.12376 0.73543
H*6 H 0.60418 -0.02141 0.69051
H*7 H 0.75619 -0.06963 0.74680
N8 N 0.89677 -0.22577 0.57499
H*9 H 0.93942 -0.34148 0.75751
H*10 H 0.95684 -0.21642 0.42765
H*11 H 0.61200 -0.35051 0.37592
C1+ C 0.77562 0.28137 0.03196
N2+ N 0.77672 0.40524 0.15872
N'3+ N 0.67222 0.43403 0.26371
N'4+ N 0.60838 0.32843 0.20100
N'5+ N 0.67005 0.23290 0.05817
O6+ O 0.86557 0.49317 0.18521
N7+ N 0.87356 0.21365 -0.10838
O8+ O 0.85637 0.10155 -0.21142
O9+ O 0.96456 0.27607 -0.10971
H*10+ H 0.83126 0.57037 0.28945

```

#END

```

data_1e_q_4
_symmetry_cell_setting      monoclinic
_symmetry_space_group_name_H-M 'P 21/c'
_symmetry_Int_Tables_number 14
loop_
_symmetry_equiv_pos_site_id

```

```

_symmetry_equiv_pos_as_xyz
1 x,y,z
2 -x,1/2+y,1/2-z
3 -x,-y,-z
4 x,1/2-y,1/2+z
_cell_length_a      10.165
_cell_length_b      7.941
_cell_length_c      11.651
_cell_angle_alpha   90.00
_cell_angle_beta    121.86
_cell_angle_gamma   90.00
_cell_volume        798.781
loop_
_atom_site_label
_atom_site_type_symbol
_atom_site_fract_x
_atom_site_fract_y
_atom_site_fract_z
C1 C 0.19856 0.56070 0.18941
N2 N 0.07540 0.56527 0.21011
H*3 H 0.03613 0.44975 0.21520
N'4 N 0.19795 0.66147 0.10190
N5 N 0.31265 0.44396 0.26735
H*6 H 0.32893 0.42393 0.35988
H*7 H 0.41165 0.46885 0.26865
N8 N 0.34201 0.65228 0.10472
H*9 H 0.32315 0.57391 0.02779
H*10 H 0.35597 0.76857 0.07579
H*11 H -0.01127 0.64081 0.14181
C1+ C -0.28067 0.54636 0.32409
N2+ N -0.15295 0.63864 0.40542
N'3+ N -0.15385 0.68270 0.51487
N'4+ N -0.28110 0.61761 0.49990
N'5+ N -0.36134 0.53295 0.38314
O6+ O -0.03658 0.68513 0.38705
N7+ N -0.32172 0.47465 0.19445
O8+ O -0.44203 0.39463 0.13483
O9+ O -0.23096 0.50162 0.15726
H*10+ H 0.03281 0.75020 0.46799

```

#END

```

data_1e_q_5
_symmetry_cell_setting      monoclinic
_symmetry_space_group_name_H-M 'P 21/a'
_symmetry_Int_Tables_number 14
loop_
_symmetry_equiv_pos_site_id
_symmetry_equiv_pos_as_xyz
1 x,y,z
2 1/2-x,1/2+y,-z
3 -x,-y,-z

```

```

4 1/2+x,1/2-y,z
_cell_length_a      17.449
_cell_length_b      7.990
_cell_length_c      5.754
_cell_angle_alpha   90.00
_cell_angle_beta    99.57
_cell_angle_gamma   90.00
_cell_volume        791.044
loop_
_atom_site_label
_atom_site_type_symbol
_atom_site_fract_x
_atom_site_fract_y
_atom_site_fract_z
C1 C -0.10039 0.89275 0.32947
N2 N -0.16871 0.98571 0.27595
H*3 H -0.16007 1.10599 0.23005
N'4 N -0.09044 0.79710 0.51342
N5 N -0.04832 0.91379 0.17461
H*6 H -0.07345 0.93595 0.00568
H*7 H -0.00805 0.82050 0.19317
N8 N -0.02065 0.69683 0.52651
H*9 H 0.02193 0.75628 0.64057
H*10 H -0.03176 0.59010 0.61173
H*11 H -0.20119 0.97809 0.40634
C1+ C 0.66156 -0.05089 -0.10059
N2+ N 0.64409 0.04598 0.07552
N'3+ N 0.59333 -0.03411 0.18330
N'4+ N 0.58019 -0.17830 0.07329
N'5+ N 0.62153 -0.19177 -0.10241
O6+ O 0.67093 0.20100 0.14436
N7+ N 0.71504 -0.00732 -0.25974
O8+ O 0.72364 -0.11084 -0.40879
O9+ O 0.74655 0.13007 -0.22869
H*10+ H 0.64444 0.22709 0.27645

```

#END

**S32.** Optimized crystal structure coordinates for 5 polymorphs of Diaminoguanidine - 5-nitrotetrazole 1*N*-oxide (cocrystal form).

```

data_1f_q_1
_symmetry_cell_setting      monoclinic
_symmetry_space_group_name_H-M 'P 21/a'
_symmetry_Int_Tables_number 14
loop_
_symmetry_equiv_pos_site_id
_symmetry_equiv_pos_as_xyz
1 x,y,z
2 1/2-x,1/2+y,-z
3 -x,-y,-z
4 1/2+x,1/2-y,z

```

```

_cell_length_a      19.690
_cell_length_b      8.629
_cell_length_c      5.406
_cell_angle_alpha   90.00
_cell_angle_beta    82.83
_cell_angle_gamma   90.00
_cell_volume        911.324
loop_
_atom_site_label
_atom_site_type_symbol
_atom_site_fract_x
_atom_site_fract_y
_atom_site_fract_z
C1 C 0.38335 0.25303 0.15031
N'2 N 0.34302 0.15571 0.06020
N3 N 0.44835 0.28247 0.02335
H*4 H 0.48490 0.29207 0.13900
N5 N 0.36895 0.33342 0.37307
N6 N 0.47205 0.19006 -0.18678
N7 N 0.27674 0.14941 0.20759
H*8 H 0.27942 0.07028 0.34708
H*9 H 0.44996 0.08281 -0.16313
H*10 H 0.45285 0.23741 -0.33609
H*11 H 0.24501 0.10116 0.09428
H*12 H 0.39162 0.43892 0.37348
H*13 H 0.31766 0.33671 0.42889
C1+ C 0.14282 0.25078 0.53086
N2+ N 0.13859 0.37593 0.38384
N'3+ N 0.08784 0.35513 0.24715
N'4+ N 0.06157 0.21848 0.31094
N'5+ N 0.09453 0.15173 0.48550
O6+ O 0.17741 0.50672 0.36563
N7+ N 0.19194 0.22930 0.70767
O8+ O 0.18809 0.10833 0.82488
O9+ O 0.23277 0.33544 0.72208
H*10+ H 0.15815 0.56806 0.23975

```

#END

```

data_1f_q_2
_symmetry_cell_setting      monoclinic
_symmetry_space_group_name_H-M 'P 21/a'
_symmetry_Int_Tables_number 14
loop_
_symmetry_equiv_pos_site_id
_symmetry_equiv_pos_as_xyz
1 x,y,z
2 1/2-x,1/2+y,-z
3 -x,-y,-z
4 1/2+x,1/2-y,z
_cell_length_a      10.928
_cell_length_b      11.894

```

```

_cell_length_c          7.166
_cell_angle_alpha      90.00
_cell_angle_beta       110.82
_cell_angle_gamma      90.00
_cell_volume           870.6
loop_
_atom_site_label
_atom_site_type_symbol
_atom_site_fract_x
_atom_site_fract_y
_atom_site_fract_z
C1 C 0.53322 0.29865 0.13266
N'2 N 0.56115 0.39133 0.23307
N3 N 0.44064 0.22500 0.15795
H*4 H 0.46689 0.14313 0.15973
N5 N 0.58977 0.26135 -0.00158
N6 N 0.39102 0.24695 0.31231
N7 N 0.65130 0.45956 0.17612
H*8 H 0.74426 0.43441 0.25962
H*9 H 0.46162 0.28820 0.42539
H*10 H 0.31645 0.30310 0.25696
H*11 H 0.64260 0.53838 0.22508
H*12 H 0.52942 0.21414 -0.11480
H*13 H 0.63225 0.32602 -0.04915
C1+ C 0.71282 -0.13383 0.29721
N2+ N 0.79595 -0.05032 0.29519
N'3+ N 0.73038 0.04592 0.25334
N'4+ N 0.60854 0.02086 0.23023
N'5+ N 0.59510 -0.08940 0.25648
O6+ O 0.92632 -0.05561 0.32854
N7+ N 0.74724 -0.25176 0.33724
O8+ O 0.65889 -0.31546 0.33268
O9+ O 0.86241 -0.27600 0.37194
H*10+ H 0.94976 0.02210 0.31345

```

#END

```

data_1f_q_3
_symmetry_cell_setting      orthorhombic
_symmetry_space_group_name_H-M 'P c a 21'
_symmetry_Int_Tables_number 29
loop_
_symmetry_equiv_pos_site_id
_symmetry_equiv_pos_as_xyz
1 x,y,z
2 1/2-x,y,1/2+z
3 1/2+x,-y,z
4 -x,-y,1/2+z
_cell_length_a              19.645
_cell_length_b              6.586
_cell_length_c              6.702
_cell_angle_alpha          90.00

```

```

_cell_angle_beta      90.00
_cell_angle_gamma    90.00
_cell_volume         867.118
loop_
_atom_site_label
_atom_site_type_symbol
_atom_site_fract_x
_atom_site_fract_y
_atom_site_fract_z
C1 C 0.16061 0.66676 0.38959
N'2 N 0.21085 0.78743 0.42738
N3 N 0.17286 0.47507 0.30755
H*4 H 0.13841 0.43615 0.20158
N5 N 0.09225 0.71041 0.41960
N6 N 0.23980 0.42664 0.24409
N7 N 0.18853 0.97124 0.52448
H*8 H 0.17507 1.07279 0.41582
H*9 H 0.26349 0.55800 0.20112
H*10 H 0.26566 0.37768 0.36671
H*11 H 0.23100 1.03053 0.58882
H*12 H 0.06335 0.58743 0.45294
H*13 H 0.08640 0.82671 0.51810
C1+ C 0.94872 0.09070 0.51658
N2+ N 0.88160 0.11218 0.47920
N'3+ N 0.85078 -0.06456 0.50892
N'4+ N 0.89887 -0.19199 0.56384
N'5+ N 0.95971 -0.10010 0.56975
O6+ O 0.84674 0.28020 0.42038
N7+ N 0.99972 0.24991 0.50088
O8+ O 1.05811 0.20238 0.54065
O9+ O 0.97903 0.41762 0.44889
H*10+ H 0.79982 0.23287 0.40992

```

#END

```

data_1f_q_4
_symmetry_cell_setting      triclinic
_symmetry_space_group_name_H-M 'P -1'
_symmetry_Int_Tables_number 2
loop_
_symmetry_equiv_pos_site_id
_symmetry_equiv_pos_as_xyz
1 x,y,z
2 -x,-y,-z
_cell_length_a      5.468
_cell_length_b      11.308
_cell_length_c      8.941
_cell_angle_alpha    65.50
_cell_angle_beta     83.23
_cell_angle_gamma    107.77
_cell_volume         459.606
loop_

```

```

_atom_site_label
_atom_site_type_symbol
_atom_site_fract_x
_atom_site_fract_y
_atom_site_fract_z
C1 C -0.41589 0.23024 0.10821
N'2 N -0.23786 0.31060 -0.03887
N3 N -0.41567 0.09917 0.21787
H*4 H -0.60236 0.02225 0.27785
N5 N -0.62078 0.26022 0.17102
N6 N -0.23982 0.04923 0.15622
N7 N -0.25870 0.44505 -0.12784
H*8 H -0.39489 0.43377 -0.19539
H*9 H -0.20953 0.08967 0.02664
H*10 H -0.05877 0.09338 0.17187
H*11 H -0.07924 0.51022 -0.21793
H*12 H -0.67611 0.21814 0.30034
H*13 H -0.57940 0.36554 0.10837
C1+ C 0.33201 0.27543 0.57253
N2+ N 0.17565 0.26887 0.70671
N'3+ N -0.07137 0.17713 0.74446
N'4+ N -0.06454 0.12856 0.63399
N'5+ N 0.18176 0.18745 0.52660
O6+ O 0.24172 0.34004 0.79647
N7+ N 0.61566 0.36388 0.49301
O8+ O 0.72462 0.35588 0.37259
O9+ O 0.71873 0.43846 0.55498
H*10+ H 0.07388 0.30581 0.88229

```

#END

```

data_1f_q_5
_symmetry_cell_setting      monoclinic
_symmetry_space_group_name_H-M 'P 21/a'
_symmetry_Int_Tables_number 14
loop_
_symmetry_equiv_pos_site_id
_symmetry_equiv_pos_as_xyz
1 x,y,z
2 1/2-x,1/2+y,-z
3 -x,-y,-z
4 1/2+x,1/2-y,z
_cell_length_a              19.852
_cell_length_b              9.022
_cell_length_c              5.099
_cell_angle_alpha           90.00
_cell_angle_beta            99.15
_cell_angle_gamma           90.00
_cell_volume                 901.634
loop_
_atom_site_label
_atom_site_type_symbol

```

```

_atom_site_fract_x
_atom_site_fract_y
_atom_site_fract_z
C1 C 0.58869 0.18251 0.15857
N'2 N 0.62190 0.20024 0.39582
N3 N 0.52988 0.26573 0.07336
H*4 H 0.49233 0.20571 -0.03616
N5 N 0.60516 0.08282 -0.02870
N6 N 0.50297 0.35495 0.26107
N7 N 0.68354 0.11288 0.44000
H*8 H 0.67122 0.00988 0.50193
H*9 H 0.51502 0.30671 0.44427
H*10 H 0.52903 0.45263 0.27368
H*11 H 0.71298 0.15953 0.60029
H*12 H 0.59189 0.11708 -0.21934
H*13 H 0.65476 0.05038 0.01562
C1+ C 0.16114 -0.21568 0.68592
N2+ N 0.14052 -0.08075 0.59083
N'3+ N 0.09999 -0.09707 0.35923
N'4+ N 0.09612 -0.24074 0.31453
N'5+ N 0.13334 -0.31633 0.51288
O6+ O 0.15591 0.05513 0.69941
N7+ N 0.20602 -0.24458 0.93497
O8+ O 0.21916 -0.37406 0.98866
O9+ O 0.22648 -0.13541 1.06790
H*10+ H 0.13112 0.12329 0.57016

```

#END

**S33.** Optimized crystal structure coordinates for 5 polymorphs of Triaminoguanidine - 5-nitrotetrazole 1*N*-oxide (cocrystal form).

```

data_lg_q_1
_symmetry_cell_setting      monoclinic
_symmetry_space_group_name_H-M 'P 21/c'
_symmetry_Int_Tables_number 14
loop_
_symmetry_equiv_pos_site_id
_symmetry_equiv_pos_as_xyz
1 x,y,z
2 -x,1/2+y,1/2-z
3 -x,-y,-z
4 x,1/2-y,1/2+z
_cell_length_a              7.104
_cell_length_b              18.462
_cell_length_c              7.107
_cell_angle_alpha           90.00
_cell_angle_beta            87.71
_cell_angle_gamma           90.00
_cell_volume                931.367
loop_
_atom_site_label

```

```

_atom_site_type_symbol
_atom_site_fract_x
_atom_site_fract_y
_atom_site_fract_z
C1 C 0.25907 0.42092 -0.54733
N'2 N 0.33245 0.45254 -0.69585
N3 N 0.36365 0.40209 -0.84921
N4 N 0.20424 0.34842 -0.54458
N5 N 0.16835 0.31630 -0.36562
N6 N 0.22963 0.45953 -0.38233
N7 N 0.23516 0.53600 -0.38726
H*8 H 0.45010 0.42844 -0.94387
H*9 H 0.23921 0.39519 -0.91498
H*10 H 0.28304 0.31953 -0.64145
H*11 H 0.06808 0.27763 -0.37883
H*12 H 0.28690 0.29302 -0.31634
H*13 H 0.13218 0.43874 -0.28991
H*14 H 0.37360 0.55066 -0.39551
H*15 H 0.18225 0.55284 -0.51188
C1+ C 0.76045 0.19125 0.45676
N2+ N 0.75075 0.12319 0.38855
N'3+ N 0.90521 0.08742 0.43166
N'4+ N 1.00756 0.13346 0.52522
N'5+ N 0.92153 0.19786 0.54263
O6+ O 0.61214 0.09164 0.29056
N7+ N 0.61833 0.24723 0.43857
O8+ O 0.65133 0.30574 0.50942
O9+ O 0.47816 0.23015 0.35330
H*10+ H 0.65845 0.04255 0.26774

```

#END

```

data_lg_q_2
_symmetry_cell_setting      monoclinic
_symmetry_space_group_name_H-M 'P 21/c'
_symmetry_Int_Tables_number 14
loop_
_symmetry_equiv_pos_site_id
_symmetry_equiv_pos_as_xyz
1 x,y,z
2 -x,1/2+y,1/2-z
3 -x,-y,-z
4 x,1/2-y,1/2+z
_cell_length_a              6.489
_cell_length_b              21.281
_cell_length_c              6.786
_cell_angle_alpha           90.00
_cell_angle_beta            89.65
_cell_angle_gamma           90.00
_cell_volume                 937.078
loop_
_atom_site_label

```

```

_atom_site_type_symbol
_atom_site_fract_x
_atom_site_fract_y
_atom_site_fract_z
C1 C -0.19895 -0.33254 0.78913
N'2 N -0.31375 -0.28589 0.73415
N3 N -0.50371 -0.30736 0.64717
N4 N -0.26200 -0.39506 0.77865
N5 N -0.10740 -0.44163 0.79862
N6 N -0.00519 -0.32139 0.86471
N7 N 0.04739 -0.26014 0.92701
H*8 H -0.56335 -0.26903 0.57865
H*9 H -0.60539 -0.31787 0.75844
H*10 H -0.36646 -0.40074 0.66830
H*11 H -0.17235 -0.48017 0.86174
H*12 H -0.04651 -0.45379 0.66504
H*13 H 0.05373 -0.35615 0.94883
H*14 H 0.08086 -0.23480 0.80340
H*15 H -0.08193 -0.23937 0.98475
C1+ C 0.54042 0.56762 0.23778
N2+ N 0.57942 0.62983 0.22709
N'3+ N 0.41815 0.65858 0.14845
N'4+ N 0.28263 0.61413 0.11185
N'5+ N 0.35420 0.55763 0.16554
O6+ O 0.75029 0.66197 0.28351
N7+ N 0.67934 0.52017 0.31527
O8+ O 0.61772 0.46608 0.31318
O9+ O 0.84604 0.53917 0.37562
H*10+ H 0.71769 0.70551 0.25141

```

#END

```

data_lg_q_3
_symmetry_cell_setting      monoclinic
_symmetry_space_group_name_H-M 'P 21/c'
_symmetry_Int_Tables_number 14
loop_
_symmetry_equiv_pos_site_id
_symmetry_equiv_pos_as_xyz
1 x,y,z
2 -x,1/2+y,1/2-z
3 -x,-y,-z
4 x,1/2-y,1/2+z
_cell_length_a              5.470
_cell_length_b              18.941
_cell_length_c              9.350
_cell_angle_alpha           90.00
_cell_angle_beta            77.29
_cell_angle_gamma           90.00
_cell_volume                944.99
loop_
_atom_site_label

```

```

_atom_site_type_symbol
_atom_site_fract_x
_atom_site_fract_y
_atom_site_fract_z
C1 C 0.69437 -0.17123 -0.26866
N'2 N 0.47886 -0.14691 -0.19973
N3 N 0.42981 -0.16344 -0.04528
N4 N 0.86304 -0.20404 -0.19794
N5 N 1.06199 -0.24256 -0.28676
N6 N 0.76759 -0.16440 -0.41909
N7 N 0.63954 -0.11655 -0.49257
H*8 H 0.24397 -0.15382 -0.00738
H*9 H 0.52050 -0.12708 0.00549
H*10 H 0.76960 -0.22721 -0.10308
H*11 H 1.21209 -0.24027 -0.23945
H*12 H 1.01373 -0.29409 -0.29610
H*13 H 0.95408 -0.16743 -0.46112
H*14 H 0.47603 -0.14027 -0.50106
H*15 H 0.58584 -0.07395 -0.42554
C1+ C 0.98896 -0.06067 0.23760
N2+ N 0.85724 -0.00184 0.22316
N'3+ N 0.70725 -0.01514 0.13250
N'4+ N 0.74787 -0.08149 0.09240
N'5+ N 0.92070 -0.11075 0.15563
O6+ O 0.86407 0.06259 0.28629
N7+ N 1.17326 -0.06745 0.32761
O8+ O 1.27403 -0.12485 0.32719
O9+ O 1.20994 -0.01452 0.39570
H*10+ H 0.74209 0.09024 0.24812

```

#END

```

data_lg_q_4
_symmetry_cell_setting      monoclinic
_symmetry_space_group_name_H-M 'P 21/a'
_symmetry_Int_Tables_number 14
loop_
_symmetry_equiv_pos_site_id
_symmetry_equiv_pos_as_xyz
1 x,y,z
2 1/2-x,1/2+y,-z
3 -x,-y,-z
4 1/2+x,1/2-y,z
_cell_length_a              14.203
_cell_length_b              7.399
_cell_length_c              9.099
_cell_angle_alpha           90.00
_cell_angle_beta            103.14
_cell_angle_gamma           90.00
_cell_volume                 931.16
loop_
_atom_site_label

```

```

_atom_site_type_symbol
_atom_site_fract_x
_atom_site_fract_y
_atom_site_fract_z
C1 C 0.33019 0.13355 -0.54583
N'2 N 0.24617 0.08514 -0.52600
N3 N 0.17334 0.09014 -0.66550
N4 N 0.34774 0.17088 -0.68738
N5 N 0.43496 0.26220 -0.69065
N6 N 0.40787 0.14793 -0.42357
N7 N 0.40230 0.06843 -0.28463
H*8 H 0.10915 0.08240 -0.63422
H*9 H 0.17812 -0.02663 -0.72386
H*10 H 0.28605 0.21512 -0.75914
H*11 H 0.45677 0.22201 -0.78435
H*12 H 0.42543 0.39889 -0.69418
H*13 H 0.47386 0.14044 -0.44751
H*14 H 0.36181 0.15266 -0.23516
H*15 H 0.36229 -0.04764 -0.30685
C1+ C 0.86377 -0.26702 0.07709
N2+ N 0.82000 -0.22244 0.18907
N'3+ N 0.73527 -0.30613 0.16643
N'4+ N 0.72783 -0.40060 0.04174
N'5+ N 0.80608 -0.37885 -0.01558
O6+ O 0.85158 -0.11174 0.30949
N7+ N 0.95783 -0.20291 0.06165
O8+ O 0.98593 -0.25778 -0.04722
O9+ O 1.00013 -0.09925 0.16010
H*10+ H 0.79939 -0.11538 0.36302

```

#END

```

data_lg_q_5
_symmetry_cell_setting      monoclinic
_symmetry_space_group_name_H-M 'P 21/a'
_symmetry_Int_Tables_number 14
loop_
_symmetry_equiv_pos_site_id
_symmetry_equiv_pos_as_xyz
1 x,y,z
2 1/2-x,1/2+y,-z
3 -x,-y,-z
4 1/2+x,1/2-y,z
_cell_length_a              19.558
_cell_length_b              9.001
_cell_length_c              5.527
_cell_angle_alpha           90.00
_cell_angle_beta            103.54
_cell_angle_gamma           90.00
_cell_volume                 945.939
loop_
_atom_site_label

```

```

_atom_site_type_symbol
_atom_site_fract_x
_atom_site_fract_y
_atom_site_fract_z
C1 C -0.08569 -0.17732 -0.17488
N'2 N -0.12670 -0.20364 -0.39147
N3 N -0.18866 -0.11092 -0.43729
N4 N -0.09824 -0.06458 -0.01785
N5 N -0.05955 -0.06969 0.23322
N6 N -0.02581 -0.26166 -0.09132
N7 N -0.00017 -0.34999 -0.26208
H*8 H -0.22228 -0.15741 -0.58648
H*9 H -0.17588 -0.00913 -0.49701
H*10 H -0.15082 -0.04316 -0.04983
H*11 H -0.05218 0.03614 0.29777
H*12 H -0.08583 -0.12810 0.34118
H*13 H 0.01205 -0.21442 0.04285
H*14 H -0.03078 -0.44290 -0.29426
H*15 H -0.00997 -0.29561 -0.42945
C1+ C 0.66084 -0.21125 0.69313
N2+ N 0.64227 -0.07568 0.59525
N'3+ N 0.60382 -0.09164 0.36470
N'4+ N 0.59916 -0.23571 0.32340
N'5+ N 0.63385 -0.31194 0.52289
O6+ O 0.65778 0.06046 0.70041
N7+ N 0.70311 -0.24070 0.94210
O8+ O 0.71464 -0.37073 0.99858
O9+ O 0.72322 -0.13141 1.07215
H*10+ H 0.63480 0.12910 0.56998

```

#END

**S34.** Optimized crystal structure coordinates for 5 polymorphs of Ammonia - 5-(trinitromethyl)tetrazole 1*N*-oxide (cocrystal form).

```

data_2a_q_1
_symmetry_cell_setting      monoclinic
_symmetry_space_group_name_H-M 'P 21/a'
_symmetry_Int_Tables_number 14
loop_
_symmetry_equiv_pos_site_id
_symmetry_equiv_pos_as_xyz
1 x,y,z
2 1/2-x,1/2+y,-z
3 -x,-y,-z
4 1/2+x,1/2-y,z
_cell_length_a              9.586
_cell_length_b              16.903
_cell_length_c              7.606
_cell_angle_alpha           90.00
_cell_angle_beta            45.01
_cell_angle_gamma           90.00

```

```

_cell_volume          871.602
loop_
_atom_site_label
_atom_site_type_symbol
_atom_site_fract_x
_atom_site_fract_y
_atom_site_fract_z
N1 N 0.29299 -0.42606 0.55341
H*2 H 0.25476 -0.45743 0.47824
H*3 H 0.19809 -0.37945 0.64601
H*4 H 0.26536 -0.46146 0.68366
C1+ C -0.24437 0.57824 -0.19210
N'2+ N -0.25896 0.50193 0.05361
N'3+ N -0.25087 0.45875 -0.09513
N'4+ N -0.24116 0.50422 -0.25050
N5+ N -0.25575 0.57677 -0.00461
C6+ C -0.23995 0.65080 -0.30511
N7+ N -0.03720 0.69447 -0.47997
O8+ O 0.00359 0.73494 -0.64237
O9+ O 0.05665 0.68445 -0.42910
N10+ N -0.28437 0.63028 -0.46040
O11+ O -0.15426 0.59414 -0.64979
O12+ O -0.44322 0.65143 -0.37562
N13+ N -0.39877 0.71164 -0.10130
O14+ O -0.54650 0.68228 0.09395
O15+ O -0.36262 0.78099 -0.15583
O16+ O -0.25897 0.63944 0.11011
H*17+ H -0.39498 0.64356 0.27165

```

#END

```

data_2a_q_2
_symmetry_cell_setting      triclinic
_symmetry_space_group_name_H-M 'P -1'
_symmetry_Int_Tables_number 2
loop_
_symmetry_equiv_pos_site_id
_symmetry_equiv_pos_as_xyz
1 x,y,z
2 -x,-y,-z
_cell_length_a             7.579
_cell_length_b             6.688
_cell_length_c             9.236
_cell_angle_alpha          90.89
_cell_angle_beta           108.47
_cell_angle_gamma          92.57
_cell_volume               443.378
loop_
_atom_site_label
_atom_site_type_symbol
_atom_site_fract_x
_atom_site_fract_y

```

```

_atom_site_fract_z
N1 N 0.30718 0.76425 -0.12932
H*2 H 0.44158 0.74728 -0.06381
H*3 H 0.27497 0.65569 -0.21357
H*4 H 0.22592 0.73318 -0.06238
C1+ C 0.00900 0.74764 0.16115
N'2+ N -0.27374 0.78566 0.00727
N'3+ N -0.16062 0.76402 -0.07186
N'4+ N 0.01585 0.73956 0.02007
N5+ N -0.16915 0.77644 0.15318
C6+ C 0.16605 0.73199 0.30428
N7+ N 0.16307 0.52714 0.38240
O8+ O 0.31145 0.47329 0.46311
O9+ O 0.00904 0.44539 0.35620
N10+ N 0.35450 0.75810 0.27203
O11+ O 0.38810 0.61961 0.20082
O12+ O 0.44584 0.91308 0.31918
N13+ N 0.16358 0.89824 0.42428
O14+ O 0.09903 1.05410 0.37001
O15+ O 0.22708 0.85897 0.55762
O16+ O -0.24018 0.79012 0.27064
H*17+ H -0.26076 0.93159 0.28130

```

#END

```

data_2a_q_3
_symmetry_cell_setting      orthorhombic
_symmetry_space_group_name_H-M 'P b c a'
_symmetry_Int_Tables_number 61
loop_
_symmetry_equiv_pos_site_id
_symmetry_equiv_pos_as_xyz
1 x,y,z
2 1/2-x,1/2+y,z
3 x,1/2-y,1/2+z
4 1/2-x,-y,1/2+z
5 -x,-y,-z
6 1/2+x,1/2-y,-z
7 -x,1/2+y,1/2-z
8 1/2+x,y,1/2-z
_cell_length_a              17.545
_cell_length_b              9.263
_cell_length_c              10.901
_cell_angle_alpha           90.00
_cell_angle_beta            90.00
_cell_angle_gamma           90.00
_cell_volume                1771.62
loop_
_atom_site_label
_atom_site_type_symbol
_atom_site_fract_x
_atom_site_fract_y

```

```

_atom_site_fract_z
N1 N 0.14821 0.59157 -0.44508
H*2 H 0.16948 0.53172 -0.37450
H*3 H 0.14941 0.52765 -0.52114
H*4 H 0.09230 0.61078 -0.42565
C1+ C 0.30846 0.81873 -0.15853
N'2+ N 0.19195 0.75084 -0.20284
N'3+ N 0.21358 0.85203 -0.27804
N'4+ N 0.28567 0.89635 -0.25332
N5+ N 0.25070 0.72945 -0.12736
C6+ C 0.38285 0.82728 -0.09473
N7+ N 0.43644 0.69726 -0.12398
O8+ O 0.50417 0.71874 -0.11398
O9+ O 0.40366 0.58600 -0.15103
N10+ N 0.42535 0.96756 -0.13179
O11+ O 0.44859 0.96842 -0.23628
O12+ O 0.42996 1.06084 -0.05390
N13+ N 0.37216 0.82989 0.04756
O14+ O 0.31335 0.88637 0.08253
O15+ O 0.42273 0.77843 0.10901
O16+ O 0.24973 0.62899 -0.03656
H*17+ H 0.21833 0.67013 0.02835

```

#END

```

data_2a_q_4
_symmetry_cell_setting      triclinic
_symmetry_space_group_name_H-M 'P -1'
_symmetry_Int_Tables_number 2
loop_
_symmetry_equiv_pos_site_id
_symmetry_equiv_pos_as_xyz
1 x,y,z
2 -x,-y,-z
_cell_length_a              7.489
_cell_length_b              9.633
_cell_length_c              6.558
_cell_angle_alpha           76.73
_cell_angle_beta            102.80
_cell_angle_gamma           81.65
_cell_volume                439.343
loop_
_atom_site_label
_atom_site_type_symbol
_atom_site_fract_x
_atom_site_fract_y
_atom_site_fract_z
N1 N 0.29923 0.47246 0.20186
H*2 H 0.28009 0.49181 0.03828
H*3 H 0.20664 0.41037 0.24246
H*4 H 0.42987 0.40956 0.27356
C1+ C 0.00727 0.25729 0.56574

```

N'2+ N -0.28837 0.34675 0.39419  
N'3+ N -0.18335 0.39022 0.26876  
N'4+ N 0.00086 0.33638 0.36994  
N5+ N -0.17073 0.26399 0.58068  
C6+ C 0.17653 0.17681 0.74154  
N7+ N 0.20940 0.00832 0.77636  
O8+ O 0.36917 -0.05881 0.85442  
O9+ O 0.06810 -0.03807 0.72550  
N10+ N 0.35302 0.22749 0.69014  
O11+ O 0.39743 0.18986 0.54146  
O12+ O 0.42548 0.29980 0.80081  
N13+ N 0.16352 0.20483 0.96375  
O14+ O 0.07405 0.32428 0.95018  
O15+ O 0.24403 0.10808 1.12615  
O16+ O -0.22987 0.19671 0.75187  
H\*17+ H -0.26810 0.27300 0.81790

#END

data\_2a\_q\_5  
\_symmetry\_cell\_setting triclinic  
\_symmetry\_space\_group\_name\_H-M 'P -1'  
\_symmetry\_Int\_Tables\_number 2  
loop\_  
\_symmetry\_equiv\_pos\_site\_id  
\_symmetry\_equiv\_pos\_as\_xyz  
1 x,y,z  
2 -x,-y,-z  
\_cell\_length\_a 7.646  
\_cell\_length\_b 6.532  
\_cell\_length\_c 8.671  
\_cell\_angle\_alpha 93.91  
\_cell\_angle\_beta 96.96  
\_cell\_angle\_gamma 86.44  
\_cell\_volume 428.236  
loop\_  
\_atom\_site\_label  
\_atom\_site\_type\_symbol  
\_atom\_site\_fract\_x  
\_atom\_site\_fract\_y  
\_atom\_site\_fract\_z  
N1 N -0.15677 -0.27067 0.78457  
H\*2 H -0.10379 -0.14919 0.85001  
H\*3 H -0.29002 -0.24132 0.77007  
H\*4 H -0.11495 -0.26946 0.67744  
C1+ C 0.08830 0.23532 0.67287  
N'2+ N -0.19989 0.22721 0.65158  
N'3+ N -0.14972 0.25359 0.51644  
N'4+ N 0.02836 0.25879 0.52541  
N5+ N -0.05226 0.21634 0.75048  
C6+ C 0.27447 0.23313 0.74412  
N7+ N 0.35195 0.01404 0.78477

O8+ O 0.51025 -0.01511 0.78932  
 O9+ O 0.24357 -0.10344 0.81162  
 N10+ N 0.39212 0.31749 0.63182  
 O11+ O 0.41206 0.20516 0.51775  
 O12+ O 0.44909 0.48550 0.66857  
 N13+ N 0.29464 0.37116 0.89898  
 O14+ O 0.18908 0.51838 0.90331  
 O15+ O 0.41244 0.32200 0.99778  
 O16+ O -0.05176 0.18566 0.90397  
 H\*17+ H -0.09137 0.31721 0.95147

#END

**S35.** Optimized crystal structure coordinates for 5 polymorphs of Hydroxylamine - 5-(trinitromethyl)tetrazole 1*N*-oxide (cocrystal form).

data\_2b\_q\_1  
 \_symmetry\_cell\_setting monoclinic  
 \_symmetry\_space\_group\_name\_H-M 'P 21/c'  
 \_symmetry\_Int\_Tables\_number 14  
 loop\_  
 \_symmetry\_equiv\_pos\_site\_id  
 \_symmetry\_equiv\_pos\_as\_xyz  
 1 x,y,z  
 2 -x,1/2+y,1/2-z  
 3 -x,-y,-z  
 4 x,1/2-y,1/2+z  
 \_cell\_length\_a 5.988  
 \_cell\_length\_b 9.667  
 \_cell\_length\_c 15.560  
 \_cell\_angle\_alpha 90.00  
 \_cell\_angle\_beta 90.55  
 \_cell\_angle\_gamma 90.00  
 \_cell\_volume 900.665  
 loop\_  
 \_atom\_site\_label  
 \_atom\_site\_type\_symbol  
 \_atom\_site\_fract\_x  
 \_atom\_site\_fract\_y  
 \_atom\_site\_fract\_z  
 N1 N 1.01957 0.85140 0.32956  
 H\*2 H 1.04873 0.92913 0.37277  
 H\*3 H 0.89253 0.88588 0.29079  
 O4 O 0.91734 0.74378 0.38030  
 H\*5 H 1.01263 0.66521 0.36969  
 C1+ C 0.37325 0.18458 -0.12723  
 N'2+ N 0.23058 0.03000 -0.04048  
 N'3+ N 0.17821 0.00004 -0.11971  
 N'4+ N 0.26456 0.09365 -0.17521  
 N5+ N 0.35185 0.14551 -0.04432  
 C6+ C 0.49466 0.30897 -0.15687  
 N7+ N 0.75381 0.29252 -0.15225

O8+ O 0.86087 0.36276 -0.20128  
O9+ O 0.82085 0.21228 -0.09757  
N10+ N 0.43008 0.34246 -0.25143  
O11+ O 0.50089 0.26085 -0.30344  
O12+ O 0.31503 0.44429 -0.26302  
N13+ N 0.43534 0.43813 -0.10120  
O14+ O 0.24711 0.43774 -0.07220  
O15+ O 0.57774 0.52603 -0.09305  
O16+ O 0.44033 0.20759 0.02656  
H\*17+ H 0.31602 0.25468 0.05398

#END

data\_2b\_q\_2  
\_symmetry\_cell\_setting triclinic  
\_symmetry\_space\_group\_name\_H-M 'P -1'  
\_symmetry\_Int\_Tables\_number 2  
loop\_  
\_symmetry\_equiv\_pos\_site\_id  
\_symmetry\_equiv\_pos\_as\_xyz  
1 x,y,z  
2 -x,-y,-z  
\_cell\_length\_a 14.378  
\_cell\_length\_b 10.295  
\_cell\_length\_c 7.611  
\_cell\_angle\_alpha 97.98  
\_cell\_angle\_beta 130.50  
\_cell\_angle\_gamma 122.81  
\_cell\_volume 461.255  
loop\_  
\_atom\_site\_label  
\_atom\_site\_type\_symbol  
\_atom\_site\_fract\_x  
\_atom\_site\_fract\_y  
\_atom\_site\_fract\_z  
N1 N 0.70520 0.15914 -0.00920  
H\*2 H 0.72485 0.13797 -0.11192  
H\*3 H 0.82836 0.22833 0.23019  
O4 O 0.50029 -0.08499 -0.24266  
H\*5 H 0.40955 -0.09161 -0.32440  
C1+ C 0.13559 0.39099 -0.10174  
N'2+ N -0.01022 0.33279 -0.04571  
N'3+ N -0.13898 0.24873 -0.35108  
N'4+ N -0.05376 0.28132 -0.39486  
N5+ N 0.16250 0.42305 0.11329  
C6+ C 0.29481 0.47032 -0.01422  
N7+ N 0.28447 0.30812 -0.05054  
O8+ O 0.34229 0.30254 -0.11204  
O9+ O 0.22390 0.20849 -0.00335  
N10+ N 0.24437 0.46759 -0.26830  
O11+ O 0.07128 0.26793 -0.57763  
O12+ O 0.38008 0.66266 -0.13349

N13+ N 0.54307 0.73316 0.38178  
O14+ O 0.56572 0.86291 0.49589  
O15+ O 0.68780 0.78407 0.53457  
O16+ O 0.33182 0.52434 0.43850  
H\*17+ H 0.42598 0.68341 0.61659

#END

data\_2b\_q\_3  
\_symmetry\_cell\_setting orthorhombic  
\_symmetry\_space\_group\_name\_H-M 'P 21 21 21'  
\_symmetry\_Int\_Tables\_number 19  
loop\_  
\_symmetry\_equiv\_pos\_site\_id  
\_symmetry\_equiv\_pos\_as\_xyz  
1 x,y,z  
2 1/2+x,1/2-y,-z  
3 -x,1/2+y,1/2-z  
4 1/2-x,-y,1/2+z  
\_cell\_length\_a 10.469  
\_cell\_length\_b 11.989  
\_cell\_length\_c 7.231  
\_cell\_angle\_alpha 90.00  
\_cell\_angle\_beta 90.00  
\_cell\_angle\_gamma 90.00  
\_cell\_volume 907.583  
loop\_  
\_atom\_site\_label  
\_atom\_site\_type\_symbol  
\_atom\_site\_fract\_x  
\_atom\_site\_fract\_y  
\_atom\_site\_fract\_z  
N1 N 0.41966 0.15987 0.69168  
H\*2 H 0.39013 0.12661 0.81462  
H\*3 H 0.51651 0.16833 0.70284  
O4 O 0.37291 0.27327 0.69724  
H\*5 H 0.32334 0.27842 0.58503  
C1+ C -0.11522 0.09017 0.75996  
N'2+ N -0.28678 0.13765 0.91500  
N'3+ N -0.29922 0.16642 0.74233  
N'4+ N -0.19463 0.13791 0.64214  
N5+ N -0.17189 0.09026 0.92789  
C6+ C 0.01382 0.04562 0.72011  
N7+ N 0.01871 -0.08448 0.71636  
O8+ O 0.10235 -0.12618 0.62392  
O9+ O -0.06129 -0.13026 0.81190  
N10+ N 0.06130 0.08829 0.52952  
O11+ O 0.00571 0.04867 0.39838  
O12+ O 0.14671 0.15677 0.53196  
N13+ N 0.11239 0.08431 0.86915  
O14+ O 0.09002 0.17502 0.93775  
O15+ O 0.20122 0.02265 0.90052

O16+ O -0.12558 0.04770 1.08863  
H\*17+ H -0.09959 0.11198 1.16198

#END

data\_2b\_q\_4  
\_symmetry\_cell\_setting monoclinic  
\_symmetry\_space\_group\_name\_H-M 'P 21/a'  
\_symmetry\_Int\_Tables\_number 14  
loop\_  
\_symmetry\_equiv\_pos\_site\_id  
\_symmetry\_equiv\_pos\_as\_xyz  
1 x,y,z  
2 1/2-x,1/2+y,-z  
3 -x,-y,-z  
4 1/2+x,1/2-y,z  
\_cell\_length\_a 15.017  
\_cell\_length\_b 9.773  
\_cell\_length\_c 6.470  
\_cell\_angle\_alpha 90.00  
\_cell\_angle\_beta 89.43  
\_cell\_angle\_gamma 90.00  
\_cell\_volume 949.498  
loop\_  
\_atom\_site\_label  
\_atom\_site\_type\_symbol  
\_atom\_site\_fract\_x  
\_atom\_site\_fract\_y  
\_atom\_site\_fract\_z  
N1 N -0.44948 0.62943 0.40687  
H\*2 H -0.41112 0.63627 0.27588  
H\*3 H -0.42557 0.54701 0.48620  
O4 O -0.53497 0.58370 0.33280  
H\*5 H -0.57506 0.65274 0.38584  
C1+ C 0.14645 -0.29432 -0.17956  
N'2+ N 0.00045 -0.29248 -0.17787  
N'3+ N 0.02947 -0.40562 -0.26064  
N'4+ N 0.11978 -0.41025 -0.26362  
N5+ N 0.07300 -0.22179 -0.12725  
C6+ C 0.23939 -0.24830 -0.14933  
N7+ N 0.26954 -0.25610 0.08054  
O8+ O 0.34859 -0.26871 0.10938  
O9+ O 0.20960 -0.24504 0.20732  
N10+ N 0.30439 -0.33752 -0.27969  
O11+ O 0.31239 -0.45371 -0.21813  
O12+ O 0.33898 -0.28285 -0.42862  
N13+ N 0.25192 -0.09643 -0.21925  
O14+ O 0.20394 -0.06061 -0.35997  
O15+ O 0.30789 -0.02999 -0.13106  
O16+ O 0.06915 -0.09764 -0.03309  
H\*17+ H 0.05318 -0.03289 -0.14107

#END

```
data_2b_q_5
_symmetry_cell_setting      triclinic
_symmetry_space_group_name_H-M 'P -1'
_symmetry_Int_Tables_number 2
loop_
_symmetry_equiv_pos_site_id
_symmetry_equiv_pos_as_xyz
1 x,y,z
2 -x,-y,-z
_cell_length_a              7.526
_cell_length_b              12.523
_cell_length_c              6.838
_cell_angle_alpha           46.05
_cell_angle_beta            92.91
_cell_angle_gamma           81.84
_cell_volume                 449.096
loop_
_atom_site_label
_atom_site_type_symbol
_atom_site_fract_x
_atom_site_fract_y
_atom_site_fract_z
N1 N 0.10583 0.60022 -0.24857
H*2 H -0.03144 0.61071 -0.24920
H*3 H 0.12423 0.60126 -0.39692
O4 O 0.18932 0.44376 0.01013
H*5 H 0.27671 0.45550 0.09865
C1+ C 0.53565 0.25295 -0.15649
N'2+ N 0.25250 0.34571 -0.38887
N'3+ N 0.36602 0.38591 -0.55447
N'4+ N 0.54286 0.32993 -0.41684
N5+ N 0.35693 0.26299 -0.13959
C6+ C 0.69221 0.17157 0.07768
N7+ N 0.73386 -0.00613 0.28609
O8+ O 0.88972 -0.07667 0.41840
O9+ O 0.60203 -0.05512 0.29778
N10+ N 0.86881 0.22103 -0.03296
O11+ O 0.93045 0.17534 -0.12985
O12+ O 0.92443 0.30053 -0.01413
N13+ N 0.65517 0.20923 0.24929
O14+ O 0.55884 0.33651 0.11549
O15+ O 0.72615 0.11136 0.49388
O16+ O 0.28618 0.19856 0.08988
H*17+ H 0.23603 0.28220 0.07075
```

#END

**S36.** Optimized crystal structure coordinates for 5 polymorphs of Hydrazine - 5-(trinitromethyl)tetrazole 1*N*-oxide (cocrystal form).

```

data_2c_q_1
_symmetry_cell_setting      monoclinic
_symmetry_space_group_name_H-M 'P 21/c'
_symmetry_Int_Tables_number 14
loop_
_symmetry_equiv_pos_site_id
_symmetry_equiv_pos_as_xyz
1 x,y,z
2 -x,1/2+y,1/2-z
3 -x,-y,-z
4 x,1/2-y,1/2+z
_cell_length_a              6.282
_cell_length_b              17.126
_cell_length_c              9.205
_cell_angle_alpha           90.00
_cell_angle_beta            78.09
_cell_angle_gamma           90.00
_cell_volume                969.006
loop_
_atom_site_label
_atom_site_type_symbol
_atom_site_fract_x
_atom_site_fract_y
_atom_site_fract_z
N1 N -0.31766 0.78924 -0.29403
H*2 H -0.20888 0.80676 -0.38644
H*3 H -0.44363 0.76264 -0.32801
N4 N -0.40498 0.85403 -0.20154
H*5 H -0.30564 0.86357 -0.12902
H*6 H -0.40853 0.90395 -0.26145
C1+ C 0.01783 0.14557 0.70891
N'2+ N -0.23554 0.23515 0.76276
N'3+ N -0.11661 0.24829 0.63157
N'4+ N 0.04177 0.19368 0.59454
N5+ N -0.15254 0.17122 0.81249
C6+ C 0.15276 0.07645 0.72500
N7+ N 0.03616 -0.00257 0.70864
O8+ O 0.15226 -0.05804 0.66752
O9+ O -0.16138 -0.00010 0.74312
N10+ N 0.36715 0.07809 0.60585
O11+ O 0.34380 0.06614 0.48054
O12+ O 0.53263 0.09187 0.64980
N13+ N 0.21521 0.07506 0.88074
O14+ O 0.23345 0.13917 0.93415
O15+ O 0.24224 0.01175 0.93228
O16+ O -0.23719 0.13862 0.94654
H*17+ H -0.18982 0.17194 1.01961

#END

```

```

data_2c_q_2
_symmetry_cell_setting      monoclinic

```

```

_symmetry_space_group_name_H-M 'P 21/a'
_symmetry_Int_Tables_number 14
loop_
_symmetry_equiv_pos_site_id
_symmetry_equiv_pos_as_xyz
1 x,y,z
2 1/2-x,1/2+y,-z
3 -x,-y,-z
4 1/2+x,1/2-y,z
_cell_length_a 8.030
_cell_length_b 19.601
_cell_length_c 5.930
_cell_angle_alpha 90.00
_cell_angle_beta 84.40
_cell_angle_gamma 90.00
_cell_volume 928.904
loop_
_atom_site_label
_atom_site_type_symbol
_atom_site_fract_x
_atom_site_fract_y
_atom_site_fract_z
N1 N 0.75067 0.67474 -0.83977
H*2 H 0.68224 0.64351 -0.93290
H*3 H 0.80198 0.64545 -0.72306
N4 N 0.64865 0.72563 -0.71906
H*5 H 0.64502 0.76695 -0.82211
H*6 H 0.52870 0.70928 -0.67988
C1+ C 0.09163 0.60904 -0.25054
N'2+ N -0.07596 0.68823 -0.35945
N'3+ N -0.13375 0.62816 -0.40383
N'4+ N -0.03302 0.57787 -0.33787
N5+ N 0.06530 0.67695 -0.26433
C6+ C 0.23694 0.57688 -0.15691
N7+ N 0.22665 0.57984 0.10712
O8+ O 0.30170 0.53601 0.19919
O9+ O 0.14661 0.62759 0.19215
N10+ N 0.25088 0.50074 -0.22799
O11+ O 0.14209 0.46459 -0.13711
O12+ O 0.36626 0.48583 -0.36693
N13+ N 0.40401 0.61277 -0.24731
O14+ O 0.40496 0.63688 -0.43675
O15+ O 0.51592 0.61256 -0.12477
O16+ O 0.16058 0.72814 -0.19099
H*17+ H 0.22004 0.74751 -0.32721

```

#END

```

data_2c_q_3
_symmetry_cell_setting monoclinic
_symmetry_space_group_name_H-M 'P 21/c'
_symmetry_Int_Tables_number 14

```

```

loop_
_symmetry_equiv_pos_site_id
_symmetry_equiv_pos_as_xyz
1 x,y,z
2 -x,1/2+y,1/2-z
3 -x,-y,-z
4 x,1/2-y,1/2+z
_cell_length_a      8.302
_cell_length_b      18.142
_cell_length_c      10.543
_cell_angle_alpha   90.00
_cell_angle_beta    37.77
_cell_angle_gamma   90.00
_cell_volume        972.598

```

```

loop_
_atom_site_label
_atom_site_type_symbol
_atom_site_fract_x
_atom_site_fract_y
_atom_site_fract_z
N1 N 0.34183 0.64310 -0.04501
H*2 H 0.49479 0.60709 -0.13140
H*3 H 0.26998 0.65314 0.08804
N4 N 0.13124 0.61304 0.01140
H*5 H 0.16657 0.62630 -0.10273
H*6 H 0.12259 0.55699 0.02304
C1+ C 0.58275 0.14475 0.03370
N'2+ N 0.31194 0.23108 0.13818
N'3+ N 0.44656 0.20612 -0.04146
N'4+ N 0.61596 0.15235 -0.11052
N5+ N 0.39607 0.19332 0.18646
C6+ C 0.72448 0.09371 0.03121
N7+ N 0.55338 0.02692 0.18128
O8+ O 0.67062 -0.02849 0.13791
O9+ O 0.31792 0.03870 0.33031
N10+ N 0.97245 0.06251 -0.19006
O11+ O 0.92601 0.01963 -0.24612
O12+ O 1.18330 0.08469 -0.28309
N13+ N 0.81718 0.13401 0.09662
O14+ O 0.86761 0.19916 0.05150
O15+ O 0.83367 0.09739 0.18189
O16+ O 0.29667 0.20349 0.36668
H*17+ H 0.37397 0.24934 0.34899

```

#END

```

data_2c_q_4
_symmetry_cell_setting      monoclinic
_symmetry_space_group_name_H-M 'P 21/c'
_symmetry_Int_Tables_number 14
loop_
_symmetry_equiv_pos_site_id

```

```

_symmetry_equiv_pos_as_xyz
1 x,y,z
2 -x,1/2+y,1/2-z
3 -x,-y,-z
4 x,1/2-y,1/2+z
_cell_length_a      7.723
_cell_length_b      8.693
_cell_length_c      14.446
_cell_angle_alpha   90.00
_cell_angle_beta    103.25
_cell_angle_gamma   90.00
_cell_volume        944.029
loop_
_atom_site_label
_atom_site_type_symbol
_atom_site_fract_x
_atom_site_fract_y
_atom_site_fract_z
N1 N 0.38532 0.93961 -0.41819
H*2 H 0.36992 0.85643 -0.46924
H*3 H 0.49855 0.91591 -0.36855
N4 N 0.24079 0.94089 -0.37083
H*5 H 0.14555 1.01252 -0.40780
H*6 H 0.18512 0.83466 -0.36988
C1+ C 0.15688 0.31314 0.64751
N'2+ N 0.01522 0.28760 0.76193
N'3+ N -0.06369 0.20697 0.68838
N'4+ N 0.02104 0.21991 0.61620
N5+ N 0.15297 0.35500 0.73710
C6+ C 0.28963 0.36631 0.59510
N7+ N 0.47530 0.28838 0.62969
O8+ O 0.56750 0.28079 0.57250
O9+ O 0.50918 0.24670 0.71228
N10+ N 0.22369 0.33190 0.48736
O11+ O 0.22287 0.19684 0.46707
O12+ O 0.17859 0.44197 0.43576
N13+ N 0.32064 0.54359 0.60651
O14+ O 0.19167 0.61694 0.61635
O15+ O 0.46626 0.59132 0.60329
O16+ O 0.26943 0.44752 0.79692
H*17+ H 0.20746 0.54492 0.79793

```

#END

```

data_2c_q_5
_symmetry_cell_setting      triclinic
_symmetry_space_group_name_H-M 'P -1'
_symmetry_Int_Tables_number 2
loop_
_symmetry_equiv_pos_site_id
_symmetry_equiv_pos_as_xyz
1 x,y,z

```

```

2 -x,-y,-z
_cell_length_a      6.436
_cell_length_b      10.791
_cell_length_c      7.796
_cell_angle_alpha   112.97
_cell_angle_beta    91.64
_cell_angle_gamma   74.66
_cell_volume        479.047
loop_
_atom_site_label
_atom_site_type_symbol
_atom_site_fract_x
_atom_site_fract_y
_atom_site_fract_z
N1 N 0.12132 0.44972 0.21381
H*2 H 0.20487 0.40629 0.29911
H*3 H -0.03831 0.46120 0.23868
N4 N 0.18176 0.36153 0.01953
H*5 H 0.30741 0.38722 -0.02122
H*6 H 0.23251 0.25809 -0.00304
C1+ C -0.39069 0.27386 0.48121
N'2+ N -0.51075 0.40558 0.77367
N'3+ N -0.65214 0.43662 0.66363
N'4+ N -0.58302 0.35658 0.48121
N5+ N -0.34615 0.30429 0.66120
C6+ C -0.24506 0.16783 0.31634
N7+ N -0.23648 0.01432 0.28385
O8+ O -0.18936 -0.07222 0.12523
O9+ O -0.27334 -0.00228 0.42441
N10+ N -0.31967 0.18991 0.13680
O11+ O -0.48654 0.16073 0.08681
O12+ O -0.20620 0.23496 0.06778
N13+ N -0.00786 0.17923 0.33716
O14+ O 0.00807 0.29684 0.42729
O15+ O 0.13564 0.07273 0.26125
O16+ O -0.16752 0.24291 0.72648
H*17+ H -0.08254 0.31031 0.76753

```

#END

**S37.** Optimized crystal structure coordinates for 5 polymorphs of Guanidine - 5-(trinitromethyl)tetrazole 1*N*-oxide (cocrystal form).

```

data_2d_q_1
_symmetry_cell_setting    monoclinic
_symmetry_space_group_name_H-M 'P 21/a'
_symmetry_Int_Tables_number 14
loop_
_symmetry_equiv_pos_site_id
_symmetry_equiv_pos_as_xyz
1 x,y,z
2 1/2-x,1/2+y,-z

```

```

3 -x,-y,-z
4 1/2+x,1/2-y,z
_cell_length_a      12.562
_cell_length_b      13.889
_cell_length_c      6.062
_cell_angle_alpha   90.00
_cell_angle_beta    102.91
_cell_angle_gamma   90.00
_cell_volume        1030.92
loop_
_atom_site_label
_atom_site_type_symbol
_atom_site_fract_x
_atom_site_fract_y
_atom_site_fract_z
C1 C 0.13283 0.45013 -0.45368
N'2 N 0.10317 0.38600 -0.32696
H*3 H 0.05088 0.33739 -0.42026
N4 N 0.19451 0.52920 -0.35766
H*5 H 0.25454 0.54913 -0.43556
H*6 H 0.22074 0.52245 -0.18776
N7 N 0.11118 0.45137 -0.69028
H*8 H 0.05500 0.40258 -0.76597
H*9 H 0.09873 0.51760 -0.76170
C1+ C 0.37821 0.25537 0.14117
N'2+ N 0.26321 0.16164 -0.08734
N'3+ N 0.36255 0.13067 -0.06986
N'4+ N 0.43592 0.18703 0.07112
N5+ N 0.27197 0.23981 0.04321
C6+ C 0.42009 0.33618 0.29566
N7+ N 0.39829 0.32312 0.53747
O8+ O 0.46022 0.36403 0.69019
O9+ O 0.31863 0.27450 0.54505
N10+ N 0.54520 0.34708 0.32131
O11+ O 0.59879 0.28303 0.42721
O12+ O 0.57561 0.41689 0.23170
N13+ N 0.36569 0.43348 0.20214
O14+ O 0.33987 0.43883 -0.00346
O15+ O 0.35570 0.49402 0.33951
O16+ O 0.18404 0.29150 0.07078
H*17+ H 0.16103 0.32886 -0.06772

```

#END

```

data_2d_q_2
_symmetry_cell_setting      triclinic
_symmetry_space_group_name_H-M 'P -1'
_symmetry_Int_Tables_number 2
loop_
_symmetry_equiv_pos_site_id
_symmetry_equiv_pos_as_xyz
1 x,y,z

```

```

2 -x,-y,-z
_cell_length_a      6.113
_cell_length_b      9.300
_cell_length_c      9.752
_cell_angle_alpha   90.97
_cell_angle_beta    72.91
_cell_angle_gamma   87.92
_cell_volume        529.359
loop_
_atom_site_label
_atom_site_type_symbol
_atom_site_fract_x
_atom_site_fract_y
_atom_site_fract_z
C1 C 0.68554 0.78237 0.69227
N'2 N 0.48907 0.72579 0.73352
H*3 H 0.36588 0.78905 0.70983
N4 N 0.87166 0.72103 0.72870
H*5 H 1.02296 0.72012 0.64991
H*6 H 0.83675 0.62401 0.77395
N7 N 0.74302 0.90438 0.60940
H*8 H 0.60718 0.96240 0.59712
H*9 H 0.85947 0.96644 0.63457
C1+ C 0.53901 -0.26612 0.29022
N'2+ N 0.25682 -0.40406 0.39223
N'3+ N 0.26397 -0.29832 0.47978
N'4+ N 0.43669 -0.21047 0.41974
N5+ N 0.42854 -0.38540 0.27350
C6+ C 0.74070 -0.21162 0.18170
N7+ N 0.67898 -0.13768 0.05461
O8+ O 0.80778 -0.04839 -0.00788
O9+ O 0.50886 -0.18120 0.02972
N10+ N 0.86018 -0.09993 0.25201
O11+ O 0.75266 0.01331 0.28709
O12+ O 1.04451 -0.13780 0.26579
N13+ N 0.92055 -0.33630 0.11442
O14+ O 0.92585 -0.43466 0.19444
O15+ O 1.03814 -0.32326 -0.00797
O16+ O 0.47328 -0.47465 0.15589
H*17+ H 0.54741 -0.56113 0.17990

```

#END

```

data_2d_q_3
_symmetry_cell_setting      monoclinic
_symmetry_space_group_name_H-M 'P 21/c'
_symmetry_Int_Tables_number 14
loop_
_symmetry_equiv_pos_site_id
_symmetry_equiv_pos_as_xyz
1 x,y,z
2 -x,1/2+y,1/2-z

```

```

3 -x,-y,-z
4 x,1/2-y,1/2+z
_cell_length_a      10.347
_cell_length_b      12.141
_cell_length_c       8.992
_cell_angle_alpha    90.00
_cell_angle_beta     74.22
_cell_angle_gamma    90.00
_cell_volume         1087.03
loop_
_atom_site_label
_atom_site_type_symbol
_atom_site_fract_x
_atom_site_fract_y
_atom_site_fract_z
C1 C 0.10782 0.66521 0.42318
N'2 N 0.16042 0.65600 0.27686
H*3 H 0.26159 0.66920 0.24829
N4 N -0.03127 0.66236 0.48412
H*5 H -0.06407 0.61995 0.58444
H*6 H -0.07883 0.64062 0.40381
N7 N 0.17518 0.67763 0.53760
H*8 H 0.27424 0.69462 0.49673
H*9 H 0.12830 0.72632 0.62773
C1+ C 0.29442 0.08833 0.46198
N'2+ N 0.15372 0.13354 0.68334
N'3+ N 0.25196 0.20420 0.64772
N'4+ N 0.34087 0.17876 0.51085
N5+ N 0.17942 0.06044 0.56834
C6+ C 0.35605 0.02597 0.31868
N7+ N 0.28084 0.04153 0.19138
O8+ O 0.34658 0.02844 0.05906
O9+ O 0.16187 0.06269 0.24017
N10+ N 0.50381 0.06285 0.24935
O11+ O 0.51615 0.15459 0.19477
O12+ O 0.59006 -0.00252 0.25862
N13+ N 0.35700 -0.10038 0.35144
O14+ O 0.36599 -0.12432 0.47979
O15+ O 0.35072 -0.16181 0.24775
O16+ O 0.09681 -0.02575 0.56377
H*17+ H 0.11299 -0.07935 0.63733

```

#END

```

data_2d_q_4
_symmetry_cell_setting      monoclinic
_symmetry_space_group_name_H-M 'P 21/a'
_symmetry_Int_Tables_number 14
loop_
_symmetry_equiv_pos_site_id
_symmetry_equiv_pos_as_xyz
1 x,y,z

```

```

2 1/2-x,1/2+y,-z
3 -x,-y,-z
4 1/2+x,1/2-y,z
_cell_length_a      18.749
_cell_length_b      5.880
_cell_length_c      9.761
_cell_angle_alpha   90.00
_cell_angle_beta    73.43
_cell_angle_gamma   90.00
_cell_volume        1031.4
loop_
_atom_site_label
_atom_site_type_symbol
_atom_site_fract_x
_atom_site_fract_y
_atom_site_fract_z
C1 C 0.08601 -0.02768 0.35537
N'2 N 0.06549 -0.21637 0.31207
H*3 H 0.10205 -0.34408 0.31389
N4 N 0.04821 0.17327 0.34603
H*5 H 0.04055 0.27903 0.43101
H*6 H 0.00092 0.14441 0.31816
N7 N 0.14451 0.00620 0.41565
H*8 H 0.17910 -0.12850 0.40681
H*9 H 0.17205 0.15566 0.39005
C1+ C 0.64942 0.20289 -0.27061
N'2+ N 0.59647 -0.03059 -0.38709
N'3+ N 0.66507 0.00679 -0.46114
N'4+ N 0.69959 0.15046 -0.39179
N5+ N 0.58594 0.09180 -0.26795
C6+ C 0.65894 0.35765 -0.15741
N7+ N 0.66525 0.22970 -0.02123
O8+ O 0.69852 0.32669 0.05106
O9+ O 0.63395 0.04634 -0.00054
N10+ N 0.73037 0.50294 -0.21442
O11+ O 0.78780 0.39728 -0.23441
O12+ O 0.72132 0.70335 -0.23429
N13+ N 0.59169 0.52466 -0.10735
O14+ O 0.56215 0.57518 -0.19927
O15+ O 0.57599 0.58989 0.01516
O16+ O 0.52051 0.09305 -0.16234
H*17+ H 0.48705 0.18843 -0.19757

```

#END

```

data_2d_q_5
_symmetry_cell_setting      monoclinic
_symmetry_space_group_name_H-M 'C 2/c'
_symmetry_Int_Tables_number 15
loop_
_symmetry_equiv_pos_site_id
_symmetry_equiv_pos_as_xyz

```

```

1 x,y,z
2 -x,y,1/2-z
3 -x,-y,-z
4 x,-y,1/2+z
5 1/2+x,1/2+y,z
6 1/2-x,1/2+y,1/2-z
7 1/2-x,1/2-y,-z
8 1/2+x,1/2-y,1/2+z
_cell_length_a      23.988
_cell_length_b      5.914
_cell_length_c      16.260
_cell_angle_alpha   90.00
_cell_angle_beta    77.32
_cell_angle_gamma   90.00
_cell_volume        2250.47
loop_
_atom_site_label
_atom_site_type_symbol
_atom_site_fract_x
_atom_site_fract_y
_atom_site_fract_z
C1 C 0.56682 -0.06144 0.11864
N'2 N 0.53794 -0.18206 0.07710
H*3 H 0.50434 -0.09353 0.06425
N4 N 0.61065 -0.15849 0.15056
H*5 H 0.64596 -0.06091 0.14572
H*6 H 0.61967 -0.31803 0.12900
N7 N 0.56029 0.16946 0.13693
H*8 H 0.52438 0.23856 0.12473
H*9 H 0.56732 0.21588 0.19382
C1+ C 0.13368 0.97235 -0.13668
N'2+ N 0.05070 1.11975 -0.14211
N'3+ N 0.08742 1.15862 -0.21246
N'4+ N 0.13930 1.06894 -0.21129
N5+ N 0.07918 1.00411 -0.09409
C6+ C 0.17838 0.85320 -0.10343
N7+ N 0.17083 0.59097 -0.10082
O8+ O 0.21362 0.47983 -0.10423
O9+ O 0.12183 0.52638 -0.09341
N10+ N 0.23836 0.90617 -0.15870
O11+ O 0.24756 0.82136 -0.22808
O12+ O 0.26898 1.02725 -0.12747
N13+ N 0.17821 0.93003 -0.01142
O14+ O 0.16306 1.12464 0.00471
O15+ O 0.19358 0.79308 0.03423
O16+ O 0.05435 0.92957 -0.01554
H*17+ H 0.05085 1.06243 0.02067

#END

```

**S38.** Optimized crystal structure coordinates for 5 polymorphs of Aminoguanidine - 5-(trinitromethyl)tetrazole 1*N*-oxide (cocrystal form).

```

data_2e_q_1
_symmetry_cell_setting      monoclinic
_symmetry_space_group_name_H-M 'P 21/a'
_symmetry_Int_Tables_number 14
loop_
_symmetry_equiv_pos_site_id
_symmetry_equiv_pos_as_xyz
1 x,y,z
2 1/2-x,1/2+y,-z
3 -x,-y,-z
4 1/2+x,1/2-y,z
_cell_length_a              12.716
_cell_length_b              6.834
_cell_length_c              13.450
_cell_angle_alpha           90.00
_cell_angle_beta            77.39
_cell_angle_gamma           90.00
_cell_volume                1140.63
loop_
_atom_site_label
_atom_site_type_symbol
_atom_site_fract_x
_atom_site_fract_y
_atom_site_fract_z
C1 C 0.12131 0.13199 -0.40293
N2 N 0.14398 0.33115 -0.39892
H*3 H 0.09429 0.40315 -0.34123
N'4 N 0.12006 0.05238 -0.48992
N5 N 0.10144 0.03690 -0.30980
H*6 H 0.14313 0.09071 -0.25968
H*7 H 0.10708 -0.11078 -0.31920
N8 N 0.10702 -0.15798 -0.48105
H*9 H 0.02720 -0.18693 -0.47648
H*10 H 0.14537 -0.21217 -0.54997
H*11 H 0.14763 0.39699 -0.46719
C1+ C 0.62861 0.29647 0.21899
N'2+ N 0.59827 0.08153 0.34298
N'3+ N 0.52774 0.06060 0.28668
N'4+ N 0.54443 0.19132 0.20889
N5+ N 0.66154 0.22909 0.30164
C6+ C 0.67849 0.46120 0.15391
N7+ N 0.78840 0.40650 0.08212
O8+ O 0.81459 0.50093 0.00457
O9+ O 0.83762 0.27634 0.11373
N10+ N 0.60202 0.53318 0.08605
O11+ O 0.59245 0.42043 0.01925
O12+ O 0.55954 0.69124 0.10748
N13+ N 0.70087 0.63831 0.21980
O14+ O 0.63778 0.65481 0.30169
O15+ O 0.77642 0.74258 0.18368
O16+ O 0.74656 0.29210 0.33911

```

H\*17+ H 0.71542 0.36758 0.39986

#END

data\_2e\_q\_2

```
_symmetry_cell_setting      monoclinic
_symmetry_space_group_name_H-M 'P 21/a'
_symmetry_Int_Tables_number 14
loop_
_symmetry_equiv_pos_site_id
_symmetry_equiv_pos_as_xyz
1 x,y,z
2 1/2-x,1/2+y,-z
3 -x,-y,-z
4 1/2+x,1/2-y,z
_cell_length_a              12.629
_cell_length_b              7.750
_cell_length_c              11.442
_cell_angle_alpha           90.00
_cell_angle_beta            92.37
_cell_angle_gamma           90.00
_cell_volume                 1118.92
loop_
_atom_site_label
_atom_site_type_symbol
_atom_site_fract_x
_atom_site_fract_y
_atom_site_fract_z
C1 C 0.73161 0.12020 0.63286
N2 N 0.74582 0.00073 0.54369
H*3 H 0.79352 0.04325 0.48055
N'4 N 0.63756 0.14521 0.67023
N5 N 0.82310 0.20304 0.67330
H*6 H 0.88956 0.13013 0.67081
H*7 H 0.81240 0.26061 0.75188
N8 N 0.63972 0.25865 0.77098
H*9 H 0.62043 0.37936 0.74091
H*10 H 0.57701 0.22172 0.81824
H*11 H 0.67545 -0.04361 0.50987
C1+ C 0.04864 0.22045 0.27500
N'2+ N -0.03553 0.23266 0.43859
N'3+ N -0.04550 0.07937 0.39294
N'4+ N 0.00601 0.06722 0.29153
N5+ N 0.02285 0.32227 0.36539
C6+ C 0.11196 0.27540 0.17546
N7+ N 0.23272 0.29261 0.20814
O8+ O 0.29260 0.27528 0.12914
O9+ O 0.25350 0.32632 0.31036
N10+ N 0.09951 0.14354 0.07377
O11+ O 0.14200 0.00599 0.09314
O12+ O 0.04826 0.19061 -0.01252
N13+ N 0.07447 0.45498 0.12743
```

O14+ O -0.01936 0.48509 0.13758  
O15+ O 0.14037 0.54513 0.08391  
O16+ O 0.05153 0.48905 0.38513  
H\*17+ H -0.01169 0.55719 0.36616

#END

data\_2e\_q\_3  
\_symmetry\_cell\_setting orthorhombic  
\_symmetry\_space\_group\_name\_H-M 'P n a 21'  
\_symmetry\_Int\_Tables\_number 33  
loop\_  
\_symmetry\_equiv\_pos\_site\_id  
\_symmetry\_equiv\_pos\_as\_xyz  
1 x,y,z  
2 1/2-x,1/2+y,1/2+z  
3 1/2+x,1/2-y,z  
4 -x,-y,1/2+z  
\_cell\_length\_a 9.603  
\_cell\_length\_b 7.936  
\_cell\_length\_c 15.100  
\_cell\_angle\_alpha 90.00  
\_cell\_angle\_beta 90.00  
\_cell\_angle\_gamma 90.00  
\_cell\_volume 1150.76  
loop\_  
\_atom\_site\_label  
\_atom\_site\_type\_symbol  
\_atom\_site\_fract\_x  
\_atom\_site\_fract\_y  
\_atom\_site\_fract\_z  
C1 C -0.12327 0.50440 0.36852  
N2 N -0.16085 0.62505 0.43130  
H\*3 H -0.26255 0.65926 0.42840  
N'4 N -0.00853 0.52314 0.32473  
N5 N -0.21648 0.37250 0.35910  
H\*6 H -0.26686 0.34031 0.41558  
H\*7 H -0.17180 0.27369 0.32686  
N8 N 0.02101 0.37746 0.27000  
H\*9 H -0.01190 0.40591 0.20734  
H\*10 H 0.12675 0.37262 0.26560  
H\*11 H -0.09635 0.72623 0.42948  
C1+ C 0.48426 0.53629 0.17671  
N'2+ N 0.40992 0.53519 0.31399  
N'3+ N 0.32480 0.44962 0.26419  
N'4+ N 0.36803 0.44739 0.17866  
N5+ N 0.50980 0.59057 0.25997  
C6+ C 0.57162 0.57419 0.09837  
N7+ N 0.71025 0.47158 0.09623  
O8+ O 0.76129 0.44756 0.02408  
O9+ O 0.75419 0.43007 0.16858  
N10+ N 0.49061 0.53425 0.01197

O11+ O 0.47258 0.38556 -0.00151  
O12+ O 0.45300 0.65430 -0.03174  
N13+ N 0.61300 0.76456 0.09568  
O14+ O 0.52773 0.85988 0.12820  
O15+ O 0.72288 0.79966 0.06114  
O16+ O 0.61965 0.68355 0.28876  
H\*17+ H 0.58310 0.79661 0.29841

#END

data\_2e\_q\_4  
\_symmetry\_cell\_setting monoclinic  
\_symmetry\_space\_group\_name\_H-M 'C c'  
\_symmetry\_Int\_Tables\_number 9  
loop\_  
\_symmetry\_equiv\_pos\_site\_id  
\_symmetry\_equiv\_pos\_as\_xyz  
1 x,y,z  
2 x,-y,1/2+z  
3 1/2+x,1/2+y,z  
4 1/2+x,1/2-y,1/2+z  
\_cell\_length\_a 6.194  
\_cell\_length\_b 23.786  
\_cell\_length\_c 7.808  
\_cell\_angle\_alpha 90.00  
\_cell\_angle\_beta 79.59  
\_cell\_angle\_gamma 90.00  
\_cell\_volume 1131.42  
loop\_  
\_atom\_site\_label  
\_atom\_site\_type\_symbol  
\_atom\_site\_fract\_x  
\_atom\_site\_fract\_y  
\_atom\_site\_fract\_z  
C1 C 0.46863 0.92617 0.10037  
N2 N 0.44045 0.97638 0.01474  
H\*3 H 0.34599 0.97252 -0.07809  
N'4 N 0.66196 0.91286 0.12785  
N5 N 0.27965 0.89457 0.14830  
H\*6 H 0.14042 0.91758 0.17938  
H\*7 H 0.29948 0.86513 0.23877  
N8 N 0.65560 0.86283 0.23456  
H\*9 H 0.70011 0.82981 0.15178  
H\*10 H 0.78201 0.86729 0.30067  
H\*11 H 0.58643 0.99508 -0.03190  
C1+ C 0.03167 0.11298 0.12691  
N'2+ N -0.12920 0.03070 0.16648  
N'3+ N -0.14649 0.05039 0.01398  
N'4+ N -0.04794 0.10131 -0.01495  
N5+ N -0.01882 0.06956 0.23862  
C6+ C 0.15168 0.16432 0.16214  
N7+ N 0.40284 0.15435 0.15139

O8+ O 0.52076 0.19483 0.11620  
O9+ O 0.45259 0.10660 0.18435  
N10+ N 0.12369 0.21106 0.02924  
O11+ O 0.21930 0.20211 -0.11751  
O12+ O 0.00865 0.25070 0.08497  
N13+ N 0.06212 0.18775 0.34839  
O14+ O -0.13213 0.17893 0.40164  
O15+ O 0.19043 0.21271 0.42051  
O16+ O 0.03435 0.06333 0.39894  
H\*17+ H -0.10085 0.07034 0.48147

#END

data\_2e\_q\_5  
\_symmetry\_cell\_setting monoclinic  
\_symmetry\_space\_group\_name\_H-M 'P 21/a'  
\_symmetry\_Int\_Tables\_number 14  
loop\_  
\_symmetry\_equiv\_pos\_site\_id  
\_symmetry\_equiv\_pos\_as\_xyz  
1 x,y,z  
2 1/2-x,1/2+y,-z  
3 -x,-y,-z  
4 1/2+x,1/2-y,z  
\_cell\_length\_a 10.486  
\_cell\_length\_b 11.411  
\_cell\_length\_c 9.220  
\_cell\_angle\_alpha 90.00  
\_cell\_angle\_beta 96.43  
\_cell\_angle\_gamma 90.00  
\_cell\_volume 1096.29  
loop\_  
\_atom\_site\_label  
\_atom\_site\_type\_symbol  
\_atom\_site\_fract\_x  
\_atom\_site\_fract\_y  
\_atom\_site\_fract\_z  
C1 C 0.23787 0.05386 0.27413  
N2 N 0.19598 -0.05741 0.22780  
H\*3 H 0.10884 -0.07931 0.25766  
N'4 N 0.35541 0.06781 0.33079  
N5 N 0.14563 0.14094 0.25426  
H\*6 H 0.08068 0.12975 0.16539  
H\*7 H 0.18660 0.22189 0.26176  
N8 N 0.38547 0.19043 0.35740  
H\*9 H 0.37740 0.20589 0.46526  
H\*10 H 0.48101 0.19774 0.34821  
H\*11 H 0.26320 -0.11942 0.25747  
C1+ C 0.65158 -0.09873 0.15803  
N'2+ N 0.45364 -0.16230 0.11533  
N'3+ N 0.50751 -0.16222 -0.00520  
N'4+ N 0.63048 -0.12356 0.01747

N5+ N 0.54263 -0.12235 0.21810  
 C6+ C 0.77103 -0.05159 0.23786  
 N7+ N 0.84779 -0.14475 0.33618  
 O8+ O 0.96213 -0.12874 0.36191  
 O9+ O 0.78277 -0.22276 0.37975  
 N10+ N 0.86092 -0.00404 0.12871  
 O11+ O 0.90843 -0.07905 0.05916  
 O12+ O 0.87274 0.10166 0.12335  
 N13+ N 0.74163 0.05175 0.34023  
 O14+ O 0.64729 0.10953 0.29703  
 O15+ O 0.81475 0.06580 0.44994  
 O16+ O 0.52193 -0.11173 0.36037  
 H\*17+ H 0.46895 -0.04198 0.36495

#END

**S39.** Optimized crystal structure coordinates for 5 polymorphs of Diaminoguanidine - 5-(trinitromethyl)tetrazole 1*N*-oxide (cocrystal form).

```

data_2f_q_1
_symmetry_cell_setting      orthorhombic
_symmetry_space_group_name_H-M 'P b c a'
_symmetry_Int_Tables_number 61
loop_
_symmetry_equiv_pos_site_id
_symmetry_equiv_pos_as_xyz
1 x,y,z
2 1/2-x,1/2+y,z
3 x,1/2-y,1/2+z
4 1/2-x,-y,1/2+z
5 -x,-y,-z
6 1/2+x,1/2-y,-z
7 -x,1/2+y,1/2-z
8 1/2+x,y,1/2-z
_cell_length_a              16.442
_cell_length_b              17.904
_cell_length_c              8.136
_cell_angle_alpha           90.00
_cell_angle_beta            90.00
_cell_angle_gamma           90.00
_cell_volume                 2395.06
loop_
_atom_site_label
_atom_site_type_symbol
_atom_site_fract_x
_atom_site_fract_y
_atom_site_fract_z
C1 C 0.25422 0.66480 -0.22950
N'2 N 0.18087 0.64387 -0.26305
N3 N 0.32037 0.62416 -0.28991
H*4 H 0.36589 0.61878 -0.20665
N5 N 0.27558 0.72550 -0.13255
  
```

N6 N 0.30547 0.55515 -0.37005  
 N7 N 0.12129 0.69567 -0.20016  
 H\*8 H 0.10867 0.68085 -0.08138  
 H\*9 H 0.25364 0.53227 -0.32178  
 H\*10 H 0.29189 0.56717 -0.48931  
 H\*11 H 0.06946 0.68476 -0.26406  
 H\*12 H 0.32879 0.74999 -0.16514  
 H\*13 H 0.22863 0.76229 -0.12283  
 C1+ C 0.40393 0.11027 0.25139  
 N'2+ N 0.27568 0.09257 0.31398  
 N'3+ N 0.28120 0.12760 0.17421  
 N'4+ N 0.35994 0.13930 0.13152  
 N5+ N 0.35203 0.08168 0.36377  
 C6+ C 0.49375 0.10949 0.26499  
 N7+ N 0.53168 0.03107 0.23115  
 O8+ O 0.60113 0.03024 0.18212  
 O9+ O 0.48727 -0.02141 0.26218  
 N10+ N 0.53168 0.16528 0.14077  
 O11+ O 0.52608 0.14636 -0.00153  
 O12+ O 0.56161 0.22150 0.19820  
 N13+ N 0.52190 0.13314 0.44089  
 O14+ O 0.47694 0.17713 0.51011  
 O15+ O 0.58510 0.10697 0.49059  
 O16+ O 0.37081 0.04532 0.50537  
 H\*17+ H 0.35981 0.08083 0.59336

#END

data\_2f\_q\_2  
 \_symmetry\_cell\_setting monoclinic  
 \_symmetry\_space\_group\_name\_H-M 'C c'  
 \_symmetry\_Int\_Tables\_number 9  
 loop\_  
 \_symmetry\_equiv\_pos\_site\_id  
 \_symmetry\_equiv\_pos\_as\_xyz  
 1 x,y,z  
 2 x,-y,1/2+z  
 3 1/2+x,1/2+y,z  
 4 1/2+x,1/2-y,1/2+z  
 \_cell\_length\_a 11.891  
 \_cell\_length\_b 9.401  
 \_cell\_length\_c 14.166  
 \_cell\_angle\_alpha 90.00  
 \_cell\_angle\_beta 48.53  
 \_cell\_angle\_gamma 90.00  
 \_cell\_volume 1186.58  
 loop\_  
 \_atom\_site\_label  
 \_atom\_site\_type\_symbol  
 \_atom\_site\_fract\_x  
 \_atom\_site\_fract\_y  
 \_atom\_site\_fract\_z

C1 C 0.23010 0.64799 0.02432  
 N'2 N 0.36939 0.67264 -0.07255  
 N3 N 0.12308 0.64659 0.01165  
 H\*4 H 0.02533 0.69392 0.08488  
 N5 N 0.17175 0.62420 0.14622  
 N6 N 0.16683 0.68998 -0.10453  
 N7 N 0.46378 0.65948 -0.04274  
 H\*8 H 0.46453 0.75571 -0.00936  
 H\*9 H 0.25185 0.76263 -0.14554  
 H\*10 H 0.21354 0.60366 -0.16252  
 H\*11 H 0.56968 0.64689 -0.12709  
 H\*12 H 0.08121 0.55887 0.19754  
 H\*13 H 0.25376 0.59430 0.14654  
 C1+ C 0.07512 0.12757 0.13253  
 N'2+ N -0.16223 0.07317 0.24546  
 N'3+ N -0.14397 0.20996 0.22682  
 N'4+ N 0.00204 0.24729 0.15680  
 N5+ N -0.02609 0.02052 0.18734  
 C6+ C 0.23776 0.11062 0.06055  
 N7+ N 0.32515 0.04588 -0.07331  
 O8+ O 0.45722 0.07463 -0.15204  
 O9+ O 0.25062 -0.03036 -0.08304  
 N10+ N 0.30965 0.25683 0.04382  
 O11+ O 0.31794 0.33711 -0.02733  
 O12+ O 0.34774 0.27568 0.10397  
 N13+ N 0.26620 0.01015 0.13077  
 O14+ O 0.16867 0.01265 0.24521  
 O15+ O 0.38119 -0.05823 0.06652  
 O16+ O 0.00006 -0.12077 0.18452  
 H\*17+ H -0.03590 -0.14327 0.26773

#END

data\_2f\_q\_3  
 \_symmetry\_cell\_setting monoclinic  
 \_symmetry\_space\_group\_name\_H-M 'P 21/a'  
 \_symmetry\_Int\_Tables\_number 14  
 loop\_  
 \_symmetry\_equiv\_pos\_site\_id  
 \_symmetry\_equiv\_pos\_as\_xyz  
 1 x,y,z  
 2 1/2-x,1/2+y,-z  
 3 -x,-y,-z  
 4 1/2+x,1/2-y,z  
 \_cell\_length\_a 14.529  
 \_cell\_length\_b 11.260  
 \_cell\_length\_c 11.036  
 \_cell\_angle\_alpha 90.00  
 \_cell\_angle\_beta 137.60  
 \_cell\_angle\_gamma 90.00  
 \_cell\_volume 1217.42  
 loop\_

```

_atom_site_label
_atom_site_type_symbol
_atom_site_fract_x
_atom_site_fract_y
_atom_site_fract_z
C1 C -0.30487 0.88064 -0.25592
N'2 N -0.37420 0.84409 -0.23096
N3 N -0.28917 1.00231 -0.26171
H*4 H -0.29660 1.02398 -0.35787
N5 N -0.24332 0.80865 -0.28233
N6 N -0.36428 1.08344 -0.26248
N7 N -0.37054 0.71648 -0.21609
H*8 H -0.44770 0.68247 -0.34311
H*9 H -0.45319 1.04322 -0.32260
H*10 H -0.30996 1.09606 -0.13203
H*11 H -0.39813 0.69935 -0.15579
H*12 H -0.15740 0.84361 -0.23556
H*13 H -0.23020 0.72467 -0.23750
C1+ C 0.18976 0.11474 0.71128
N'2+ N 0.10642 0.04951 0.80220
N'3+ N 0.00937 0.09636 0.64299
N'4+ N 0.05750 0.13743 0.58238
N5+ N 0.21983 0.06087 0.84664
C6+ C 0.28985 0.14380 0.71247
N7+ N 0.33683 0.03300 0.68408
O8+ O 0.37630 0.05128 0.62027
O9+ O 0.33173 -0.06052 0.73415
N10+ N 0.22762 0.23429 0.56145
O11+ O 0.13838 0.19410 0.41097
O12+ O 0.27304 0.33455 0.60913
N13+ N 0.42158 0.20083 0.89518
O14+ O 0.40327 0.25846 0.96936
O15+ O 0.52745 0.18431 0.94431
O16+ O 0.34321 0.02003 1.00435
H*17+ H 0.37457 0.07690 1.09529

```

#END

```

data_2f_q_4
_symmetry_cell_setting      monoclinic
_symmetry_space_group_name_H-M 'C c'
_symmetry_Int_Tables_number 9
loop_
_symmetry_equiv_pos_site_id
_symmetry_equiv_pos_as_xyz
1 x,y,z
2 x,-y,1/2+z
3 1/2+x,1/2+y,z
4 1/2+x,1/2-y,1/2+z
_cell_length_a              9.152
_cell_length_b              12.108
_cell_length_c              10.825

```

```

_cell_angle_alpha      90.00
_cell_angle_beta      82.76
_cell_angle_gamma     90.00
_cell_volume          1189.98
loop_
_atom_site_label
_atom_site_type_symbol
_atom_site_fract_x
_atom_site_fract_y
_atom_site_fract_z
C1 C 0.28234 0.20949 0.76053
N'2 N 0.35141 0.19317 0.65040
N3 N 0.25432 0.31708 0.80405
H*4 H 0.26876 0.32634 0.89482
N5 N 0.23285 0.12772 0.84552
N6 N 0.31873 0.40654 0.73208
N7 N 0.36031 0.07735 0.61902
H*8 H 0.45186 0.04580 0.65168
H*9 H 0.41574 0.38010 0.68367
H*10 H 0.25143 0.42354 0.66640
H*11 H 0.38307 0.07483 0.52463
H*12 H 0.14065 0.14826 0.90295
H*13 H 0.22479 0.05375 0.80223
C1+ C -0.26120 0.15680 0.81590
N'2+ N -0.29423 0.06327 0.99063
N'3+ N -0.40551 0.04798 0.92861
N'4+ N -0.38838 0.10459 0.81958
N5+ N -0.20349 0.13152 0.92131
C6+ C -0.19268 0.23146 0.71671
N7+ N -0.05921 0.17821 0.63386
O8+ O -0.03164 0.21395 0.52915
O9+ O 0.00563 0.10753 0.68545
N10+ N -0.30742 0.26594 0.62994
O11+ O -0.34336 0.19245 0.56430
O12+ O -0.34971 0.36101 0.63791
N13+ N -0.13416 0.33917 0.77304
O14+ O -0.20347 0.36886 0.87086
O15+ O -0.02866 0.38333 0.71473
O16+ O -0.07273 0.16533 0.95530
H*17+ H -0.09750 0.22087 1.01969

```

#END

```

data_2f_q_5
_symmetry_cell_setting      monoclinic
_symmetry_space_group_name_H-M 'P 21/a'
_symmetry_Int_Tables_number 14
loop_
_symmetry_equiv_pos_site_id
_symmetry_equiv_pos_as_xyz
1 x,y,z
2 1/2-x,1/2+y,-z

```

```

3 -x,-y,-z
4 1/2+x,1/2-y,z
_cell_length_a      20.231
_cell_length_b      6.144
_cell_length_c      10.588
_cell_angle_alpha   90.00
_cell_angle_beta    109.92
_cell_angle_gamma   90.00
_cell_volume        1237.34
loop_
_atom_site_label
_atom_site_type_symbol
_atom_site_fract_x
_atom_site_fract_y
_atom_site_fract_z
C1 C 0.61592 0.78065 0.19694
N'2 N 0.64431 0.96164 0.17989
N3 N 0.64797 0.65460 0.31144
H*4 H 0.64598 0.49283 0.29152
N5 N 0.55466 0.69116 0.10827
N6 N 0.71586 0.71476 0.39870
N7 N 0.60107 1.07554 0.06138
H*8 H 0.61344 1.01823 -0.01857
H*9 H 0.74173 0.79086 0.34316
H*10 H 0.70900 0.83083 0.46181
H*11 H 0.61848 1.23206 0.07402
H*12 H 0.52676 0.60197 0.15319
H*13 H 0.52531 0.80615 0.04437
C1+ C 0.32921 0.19088 0.22397
N'2+ N 0.22294 0.06628 0.12003
N'3+ N 0.26357 0.01905 0.05141
N'4+ N 0.32992 0.09349 0.11324
N5+ N 0.26333 0.17447 0.22792
C6+ C 0.38858 0.30239 0.32589
N7+ N 0.41960 0.17011 0.45892
O8+ O 0.48041 0.20529 0.52507
O9+ O 0.37812 0.04843 0.48350
N10+ N 0.44903 0.34370 0.26979
O11+ O 0.47979 0.18112 0.25660
O12+ O 0.45843 0.53121 0.24394
N13+ N 0.36542 0.52781 0.36501
O14+ O 0.31888 0.61797 0.27549
O15+ O 0.39585 0.59257 0.47782
O16+ O 0.23917 0.24821 0.32512
H*17+ H 0.21125 0.37683 0.28743

```

#END

**S40.** Optimized crystal structure coordinates for 5 polymorphs of Triaminoguanidine - 5-(trinitromethyl)tetrazole 1*N*-oxide (cocrystal form).

data\_2g\_q\_1

```

_symmetry_cell_setting      monoclinic
_symmetry_space_group_name_H-M 'P 21/c'
_symmetry_Int_Tables_number 14
loop_
_symmetry_equiv_pos_site_id
_symmetry_equiv_pos_as_xyz
1 x,y,z
2 -x,1/2+y,1/2-z
3 -x,-y,-z
4 x,1/2-y,1/2+z
_cell_length_a             10.031
_cell_length_b             11.978
_cell_length_c             10.820
_cell_angle_alpha          90.00
_cell_angle_beta           82.55
_cell_angle_gamma          90.00
_cell_volume               1289.06
loop_
_atom_site_label
_atom_site_type_symbol
_atom_site_fract_x
_atom_site_fract_y
_atom_site_fract_z
C1 C -0.22609 0.56425 0.26540
N'2 N -0.30760 0.56283 0.36879
N3 N -0.34482 0.67428 0.41093
N4 N -0.18922 0.66194 0.19971
N5 N -0.07697 0.65567 0.10583
N6 N -0.17276 0.46566 0.21449
N7 N -0.23126 0.36302 0.25682
H*8 H -0.38743 0.66506 0.50085
H*9 H -0.42058 0.70160 0.36349
H*10 H -0.19412 0.72846 0.25902
H*11 H -0.09066 0.71165 0.03812
H*12 H 0.01018 0.67396 0.14070
H*13 H -0.13950 0.46790 0.12225
H*14 H -0.19806 0.34581 0.33991
H*15 H -0.33277 0.37468 0.27830
C1+ C 0.22726 0.89508 -0.19220
N'2+ N 0.14254 0.83076 -0.00903
N'3+ N 0.05228 0.82680 -0.08520
N'4+ N 0.10163 0.86582 -0.19977
N5+ N 0.25225 0.87370 -0.07474
C6+ C 0.32463 0.94432 -0.29195
N7+ N 0.43544 0.86034 -0.34757
O8+ O 0.48657 0.87783 -0.45330
O9+ O 0.46094 0.78708 -0.27638
N10+ N 0.25073 0.98636 -0.40048
O11+ O 0.20752 0.91287 -0.46089
O12+ O 0.24271 1.08684 -0.41229
N13+ N 0.39924 1.04624 -0.24242
O14+ O 0.33372 1.09849 -0.15905

```

O15+ O 0.51241 1.06463 -0.29152  
O16+ O 0.36933 0.88904 -0.02637  
H\*17+ H 0.35521 0.95498 0.02643

#END

data\_2g\_q\_2  
\_symmetry\_cell\_setting monoclinic  
\_symmetry\_space\_group\_name\_H-M 'P 21/a'  
\_symmetry\_Int\_Tables\_number 14  
loop\_  
\_symmetry\_equiv\_pos\_site\_id  
\_symmetry\_equiv\_pos\_as\_xyz  
1 x,y,z  
2 1/2-x,1/2+y,-z  
3 -x,-y,-z  
4 1/2+x,1/2-y,z  
\_cell\_length\_a 14.169  
\_cell\_length\_b 9.541  
\_cell\_length\_c 9.482  
\_cell\_angle\_alpha 90.00  
\_cell\_angle\_beta 87.22  
\_cell\_angle\_gamma 90.00  
\_cell\_volume 1280.33  
loop\_  
\_atom\_site\_label  
\_atom\_site\_type\_symbol  
\_atom\_site\_fract\_x  
\_atom\_site\_fract\_y  
\_atom\_site\_fract\_z  
C1 C 0.63938 0.36267 0.71195  
N'2 N 0.57235 0.28174 0.67124  
N3 N 0.48274 0.31555 0.74212  
N4 N 0.62360 0.47492 0.80419  
N5 N 0.70376 0.53358 0.86576  
N6 N 0.73143 0.34069 0.66222  
N7 N 0.74930 0.25451 0.54275  
H\*8 H 0.44001 0.23280 0.72297  
H\*9 H 0.45406 0.39904 0.69148  
H\*10 H 0.56530 0.45662 0.86897  
H\*11 H 0.69117 0.63709 0.88311  
H\*12 H 0.71655 0.48618 0.95933  
H\*13 H 0.77503 0.42418 0.66764  
H\*14 H 0.74338 0.15325 0.57631  
H\*15 H 0.69528 0.26767 0.47602  
C1+ C -0.08483 0.36334 0.19919  
N'2+ N -0.21487 0.48517 0.23624  
N'3+ N -0.21925 0.41362 0.11985  
N'4+ N -0.13982 0.33658 0.09390  
N5+ N -0.13098 0.45501 0.28656  
C6+ C 0.01090 0.30674 0.21941  
N7+ N 0.01281 0.19353 0.33806

O8+ O 0.07638 0.10891 0.32843  
O9+ O -0.04936 0.20514 0.43039  
N10+ N 0.05143 0.23882 0.08064  
O11+ O 0.01316 0.13061 0.04936  
O12+ O 0.11541 0.30113 0.01819  
N13+ N 0.08045 0.42529 0.26075  
O14+ O 0.06342 0.54031 0.21237  
O15+ O 0.14442 0.39244 0.33398  
O16+ O -0.10146 0.50908 0.40945  
H\*17+ H -0.08325 0.60549 0.38791

#END

data\_2g\_q\_3  
\_symmetry\_cell\_setting monoclinic  
\_symmetry\_space\_group\_name\_H-M 'P 21/a'  
\_symmetry\_Int\_Tables\_number 14  
loop\_  
\_symmetry\_equiv\_pos\_site\_id  
\_symmetry\_equiv\_pos\_as\_xyz  
1 x,y,z  
2 1/2-x,1/2+y,-z  
3 -x,-y,-z  
4 1/2+x,1/2-y,z  
\_cell\_length\_a 14.183  
\_cell\_length\_b 12.214  
\_cell\_length\_c 11.143  
\_cell\_angle\_alpha 90.00  
\_cell\_angle\_beta 136.23  
\_cell\_angle\_gamma 90.00  
\_cell\_volume 1335.32  
loop\_  
\_atom\_site\_label  
\_atom\_site\_type\_symbol  
\_atom\_site\_fract\_x  
\_atom\_site\_fract\_y  
\_atom\_site\_fract\_z  
C1 C -0.06204 -0.81493 0.65977  
N'2 N -0.07178 -0.82319 0.53506  
N3 N -0.11541 -0.93124 0.45905  
N4 N -0.10021 -0.89840 0.70310  
N5 N -0.05521 -0.88960 0.86494  
N6 N -0.01359 -0.71954 0.75541  
N7 N -0.00681 -0.62319 0.69176  
H\*8 H -0.09639 -0.93520 0.38694  
H\*9 H -0.21928 -0.93537 0.37170  
H\*10 H -0.09062 -0.97277 0.67109  
H\*11 H -0.12569 -0.92577 0.85385  
H\*12 H 0.03650 -0.92741 0.96107  
H\*13 H -0.03998 -0.70711 0.81778  
H\*14 H 0.07754 -0.62967 0.71633  
H\*15 H -0.08724 -0.62331 0.55923

C1+ C 0.36085 0.13279 0.16345  
 N'2+ N 0.34516 0.06382 0.33016  
 N'3+ N 0.24504 0.02834 0.17207  
 N'4+ N 0.25189 0.06931 0.06536  
 N5+ N 0.41800 0.12955 0.32627  
 C6+ C 0.41222 0.19809 0.10821  
 N7+ N 0.54264 0.14840 0.16919  
 O8+ O 0.56224 0.17083 0.08288  
 O9+ O 0.61303 0.09405 0.30119  
 N10+ N 0.30133 0.20697 -0.09254  
 O11+ O 0.27921 0.12237 -0.16587  
 O12+ O 0.24815 0.29598 -0.15401  
 N13+ N 0.44990 0.31692 0.18279  
 O14+ O 0.38203 0.35264 0.20315  
 O15+ O 0.53998 0.36240 0.21077  
 O16+ O 0.53314 0.18100 0.46967  
 H\*17+ H 0.50220 0.24162 0.49111

#END

data\_2g\_q\_4  
 \_symmetry\_cell\_setting orthorhombic  
 \_symmetry\_space\_group\_name\_H-M 'P 21 21 21'  
 \_symmetry\_Int\_Tables\_number 19  
 loop\_  
 \_symmetry\_equiv\_pos\_site\_id  
 \_symmetry\_equiv\_pos\_as\_xyz  
 1 x,y,z  
 2 1/2+x,1/2-y,-z  
 3 -x,1/2+y,1/2-z  
 4 1/2-x,-y,1/2+z  
 \_cell\_length\_a 13.868  
 \_cell\_length\_b 9.863  
 \_cell\_length\_c 9.058  
 \_cell\_angle\_alpha 90.00  
 \_cell\_angle\_beta 90.00  
 \_cell\_angle\_gamma 90.00  
 \_cell\_volume 1238.95  
 loop\_  
 \_atom\_site\_label  
 \_atom\_site\_type\_symbol  
 \_atom\_site\_fract\_x  
 \_atom\_site\_fract\_y  
 \_atom\_site\_fract\_z  
 C1 C 0.44909 -0.02121 -0.22458  
 N'2 N 0.38082 -0.06637 -0.30925  
 N3 N 0.31419 -0.15134 -0.22892  
 N4 N 0.45179 -0.04427 -0.07280  
 N5 N 0.54014 -0.01784 0.00039  
 N6 N 0.52312 0.05518 -0.28364  
 N7 N 0.51252 0.11177 -0.42600  
 H\*8 H 0.27508 -0.19992 -0.30774

H\*9 H 0.26615 -0.09011 -0.17476  
H\*10 H 0.41698 -0.13241 -0.04761  
H\*11 H 0.52510 0.01172 0.10529  
H\*12 H 0.58270 -0.10213 0.00344  
H\*13 H 0.55906 0.11468 -0.21133  
H\*14 H 0.52456 0.03575 -0.50001  
H\*15 H 0.44160 0.13755 -0.44036  
C1+ C 0.11349 0.25097 -0.21931  
N'2+ N -0.00820 0.13118 -0.13645  
N'3+ N -0.03962 0.24334 -0.19499  
N'4+ N 0.03398 0.31987 -0.24784  
N5+ N 0.08749 0.13502 -0.15049  
C6+ C 0.21390 0.29175 -0.25293  
N7+ N 0.25864 0.21165 -0.38482  
O8+ O 0.32258 0.26764 -0.45219  
O9+ O 0.22547 0.09873 -0.40332  
N10+ N 0.21807 0.44484 -0.29190  
O11+ O 0.18195 0.47355 -0.40940  
O12+ O 0.25543 0.51871 -0.20122  
N13+ N 0.28146 0.26788 -0.11733  
O14+ O 0.24234 0.27935 0.00243  
O15+ O 0.36513 0.24253 -0.14294  
O16+ O 0.14582 0.03305 -0.10362  
H\*17+ H 0.14900 0.04232 0.00337

#END

data\_2g\_q\_5  
\_symmetry\_cell\_setting monoclinic  
\_symmetry\_space\_group\_name\_H-M 'P 21/a'  
\_symmetry\_Int\_Tables\_number 14  
loop\_  
\_symmetry\_equiv\_pos\_site\_id  
\_symmetry\_equiv\_pos\_as\_xyz  
1 x,y,z  
2 1/2-x,1/2+y,-z  
3 -x,-y,-z  
4 1/2+x,1/2-y,z  
\_cell\_length\_a 9.115  
\_cell\_length\_b 14.136  
\_cell\_length\_c 9.687  
\_cell\_angle\_alpha 90.00  
\_cell\_angle\_beta 93.27  
\_cell\_angle\_gamma 90.00  
\_cell\_volume 1246.13  
loop\_  
\_atom\_site\_label  
\_atom\_site\_type\_symbol  
\_atom\_site\_fract\_x  
\_atom\_site\_fract\_y  
\_atom\_site\_fract\_z  
C1 C 0.76711 0.72131 0.19009

N'2 N 0.73833 0.73816 0.31738  
 N3 N 0.67672 0.65626 0.38182  
 N4 N 0.75080 0.63237 0.12901  
 N5 N 0.75219 0.62820 -0.01709  
 N6 N 0.81834 0.79300 0.10874  
 N7 N 0.87328 0.87687 0.17190  
 H\*8 H 0.63453 0.68102 0.46977  
 H\*9 H 0.76111 0.61222 0.41407  
 H\*10 H 0.67155 0.59466 0.17499  
 H\*11 H 0.79471 0.56474 -0.04343  
 H\*12 H 0.64878 0.63460 -0.06216  
 H\*13 H 0.87276 0.77186 0.02607  
 H\*14 H 0.78468 0.91642 0.19573  
 H\*15 H 0.92427 0.85951 0.26544  
 C1+ C 0.24237 0.09089 0.28681  
 N'2+ N 0.03976 0.08078 0.39751  
 N'3+ N 0.00871 0.07810 0.26471  
 N'4+ N 0.13196 0.08396 0.19298  
 N5+ N 0.18552 0.08914 0.41262  
 C6+ C 0.40048 0.10056 0.26187  
 N7+ N 0.49004 0.00821 0.29351  
 O8+ O 0.60090 -0.00207 0.23220  
 O9+ O 0.43975 -0.04287 0.38017  
 N10+ N 0.42032 0.12735 0.10871  
 O11+ O 0.39059 0.06454 0.02700  
 O12+ O 0.46118 0.20746 0.08711  
 N13+ N 0.47378 0.18003 0.35430  
 O14+ O 0.39232 0.24489 0.38148  
 O15+ O 0.60275 0.17081 0.38826  
 O16+ O 0.25943 0.09268 0.53836  
 H\*17+ H 0.24354 0.15632 0.57315

#END

**S41.** Optimized crystal structure coordinates for 5 polymorphs of Ammonia - 6-amino-3-(1-hydroxy-1*H*-tetrazole-5-yl)-1,2,4,5-tetrazine 1,5-dioxide (cocrystal form).

```

data_3a_q_1
_symmetry_cell_setting      monoclinic
_symmetry_space_group_name_H-M 'P 21/c'
_symmetry_Int_Tables_number 14
loop_
_symmetry_equiv_pos_site_id
_symmetry_equiv_pos_as_xyz
1 x,y,z
2 -x,1/2+y,1/2-z
3 -x,-y,-z
4 x,1/2-y,1/2+z
_cell_length_a              16.336
_cell_length_b              8.454
_cell_length_c              6.810
_cell_angle_alpha           90.00
  
```

```

_cell_angle_beta      66.20
_cell_angle_gamma     90.00
_cell_volume          860.512
loop_
_atom_site_label
_atom_site_type_symbol
_atom_site_fract_x
_atom_site_fract_y
_atom_site_fract_z
N1 N -0.25923 0.97954 0.28964
H*2 H -0.20345 0.91036 0.24115
H*3 H -0.24015 1.08572 0.21405
H*4 H -0.30150 0.92890 0.23140
C1+ C 0.15688 -0.02588 0.22309
N'2+ N 0.12059 -0.14990 0.16691
C3+ C 0.24375 -0.02094 0.23944
C4+ C 0.39965 -0.01436 0.26232
N'5+ N 0.04162 -0.10127 0.17116
N'6+ N 0.02706 0.04773 0.22721
N7+ N 0.09850 0.09492 0.25892
N'8+ N 0.28146 0.12166 0.22141
N9+ N 0.36079 0.12283 0.23507
N10+ N 0.35536 -0.15511 0.27824
N'11+ N 0.27545 -0.16092 0.26844
O12+ O 0.10534 0.24528 0.32376
O13+ O 0.39229 -0.27892 0.30399
O14+ O 0.40219 0.25042 0.22191
N15+ N 0.47925 -0.01133 0.27432
H*16+ H 0.50581 -0.11524 0.29340
H*17+ H 0.50988 0.09448 0.26110
H*18+ H 0.04709 0.29162 0.35175

```

#END

```

data_3a_q_2
_symmetry_cell_setting      monoclinic
_symmetry_space_group_name_H-M 'P 21/a'
_symmetry_Int_Tables_number 14
loop_
_symmetry_equiv_pos_site_id
_symmetry_equiv_pos_as_xyz
1 x,y,z
2 1/2-x,1/2+y,-z
3 -x,-y,-z
4 1/2+x,1/2-y,z
_cell_length_a      19.751
_cell_length_b      8.500
_cell_length_c      6.661
_cell_angle_alpha    90.00
_cell_angle_beta     50.42
_cell_angle_gamma    90.00
_cell_volume         861.892

```

```

loop_
  _atom_site_label
  _atom_site_type_symbol
  _atom_site_fract_x
  _atom_site_fract_y
  _atom_site_fract_z
N1 N 0.49289 -0.22459 0.80553
H*2 H 0.50120 -0.33461 0.73206
H*3 H 0.55388 -0.17642 0.70447
H*4 H 0.46043 -0.16037 0.76107
C1+ C -0.09324 0.22412 0.81097
N'2+ N -0.13172 0.09953 0.79934
C3+ C -0.00558 0.22952 0.73705
C4+ C 0.15154 0.23682 0.59819
N'5+ N -0.21065 0.14784 0.88275
N'6+ N -0.22309 0.29718 0.94558
N7+ N -0.15034 0.34491 0.90063
N'8+ N 0.03259 0.37097 0.67410
N9+ N 0.11259 0.37256 0.60550
N10+ N 0.10672 0.09717 0.66579
N'11+ N 0.02620 0.09105 0.73896
O12+ O -0.14108 0.49582 0.94990
O13+ O 0.14377 -0.02530 0.65839
O14+ O 0.15451 0.49919 0.54417
N15+ N 0.23178 0.24023 0.52761
H*16+ H 0.25837 0.13738 0.52351
H*17+ H 0.26277 0.34519 0.47832
H*18+ H -0.19863 0.54242 1.03515

```

#END

```

data_3a_q_3
  _symmetry_cell_setting      monoclinic
  _symmetry_space_group_name_H-M 'P 21/a'
  _symmetry_Int_Tables_number 14
loop_
  _symmetry_equiv_pos_site_id
  _symmetry_equiv_pos_as_xyz
1 x,y,z
2 1/2-x,1/2+y,-z
3 -x,-y,-z
4 1/2+x,1/2-y,z
  _cell_length_a      18.823
  _cell_length_b      8.613
  _cell_length_c      6.460
  _cell_angle_alpha   90.00
  _cell_angle_beta    56.98
  _cell_angle_gamma   90.00
  _cell_volume        878.15
loop_
  _atom_site_label
  _atom_site_type_symbol

```

```

_atom_site_fract_x
_atom_site_fract_y
_atom_site_fract_z
N1 N -0.06340 0.72383 0.35512
H*2 H -0.00434 0.67609 0.26522
H*3 H -0.05842 0.82618 0.26901
H*4 H -0.10016 0.65231 0.32560
C1+ C 0.40476 0.20821 0.31549
N'2+ N 0.36210 0.08502 0.31385
C3+ C 0.49407 0.21268 0.23704
C4+ C 0.65375 0.21823 0.09065
N'5+ N 0.28304 0.13371 0.39803
N'6+ N 0.27450 0.28195 0.45181
N7+ N 0.34990 0.32856 0.40020
N'8+ N 0.53193 0.35139 0.16929
N9+ N 0.61334 0.35215 0.09678
N10+ N 0.60907 0.08134 0.16339
N'11+ N 0.52736 0.07618 0.24035
O12+ O 0.36377 0.47820 0.43891
O13+ O 0.64752 -0.03950 0.15692
O14+ O 0.65523 0.47628 0.03065
N15+ N 0.73532 0.22076 0.01622
H*16+ H 0.76289 0.11930 0.01325
H*17+ H 0.76611 0.32366 -0.03673
H*18+ H 0.30770 0.52528 0.52240

```

#END

```

data_3a_q_4
_symmetry_cell_setting      monoclinic
_symmetry_space_group_name_H-M 'P 21/c'
_symmetry_Int_Tables_number 14
loop_
_symmetry_equiv_pos_site_id
_symmetry_equiv_pos_as_xyz
1 x,y,z
2 -x,1/2+y,1/2-z
3 -x,-y,-z
4 x,1/2-y,1/2+z
_cell_length_a              10.211
_cell_length_b              8.492
_cell_length_c              14.124
_cell_angle_alpha           90.00
_cell_angle_beta            45.77
_cell_angle_gamma           90.00
_cell_volume                 877.566
loop_
_atom_site_label
_atom_site_type_symbol
_atom_site_fract_x
_atom_site_fract_y
_atom_site_fract_z

```

N1 N -0.01876 0.25520 0.65861  
 H\*2 H 0.10655 0.30597 0.60316  
 H\*3 H -0.08959 0.32245 0.64716  
 H\*4 H 0.00172 0.14846 0.61707  
 C1+ C -0.18311 0.74163 0.15123  
 N'2+ N -0.25360 0.61941 0.13999  
 C3+ C -0.00778 0.74623 0.11329  
 C4+ C 0.30700 0.75235 0.04199  
 N'5+ N -0.41414 0.66767 0.18510  
 N'6+ N -0.44684 0.81474 0.22383  
 N7+ N -0.30367 0.86105 0.20261  
 N'8+ N 0.06678 0.88853 0.08770  
 N9+ N 0.22695 0.88943 0.05236  
 N10+ N 0.21914 0.61195 0.07007  
 N'11+ N 0.05777 0.60634 0.10752  
 O12+ O -0.29330 1.00928 0.23435  
 O13+ O 0.29511 0.48821 0.06029  
 O14+ O 0.30911 1.01668 0.02686  
 N15+ N 0.46773 0.75515 0.00573  
 H\*16+ H 0.52258 0.65135 -0.00138  
 H\*17+ H 0.52842 0.86072 -0.01459  
 H\*18+ H -0.41236 1.05477 0.28009

#END

data\_3a\_q\_5  
 \_symmetry\_cell\_setting monoclinic  
 \_symmetry\_space\_group\_name\_H-M 'P 21/c'  
 \_symmetry\_Int\_Tables\_number 14  
 loop\_  
 \_symmetry\_equiv\_pos\_site\_id  
 \_symmetry\_equiv\_pos\_as\_xyz  
 1 x,y,z  
 2 -x,1/2+y,1/2-z  
 3 -x,-y,-z  
 4 x,1/2-y,1/2+z  
 \_cell\_length\_a 9.522  
 \_cell\_length\_b 8.590  
 \_cell\_length\_c 15.860  
 \_cell\_angle\_alpha 90.00  
 \_cell\_angle\_beta 136.81  
 \_cell\_angle\_gamma 90.00  
 \_cell\_volume 887.865  
 loop\_  
 \_atom\_site\_label  
 \_atom\_site\_type\_symbol  
 \_atom\_site\_fract\_x  
 \_atom\_site\_fract\_y  
 \_atom\_site\_fract\_z  
 N1 N 0.24817 0.80196 -0.31164  
 H\*2 H 0.18373 0.69507 -0.34858  
 H\*3 H 0.26572 0.85034 -0.36218

H\*4 H 0.14301 0.86799 -0.32632  
 C1+ C 0.11794 0.23268 0.65191  
 N'2+ N 0.02987 0.10798 0.64807  
 C3+ C 0.21579 0.24142 0.61148  
 C4+ C 0.38469 0.25472 0.53609  
 N'5+ N -0.04099 0.15271 0.69280  
 N'6+ N -0.00131 0.29993 0.72422  
 N7+ N 0.09668 0.34995 0.69866  
 N'8+ N 0.22706 0.38284 0.58155  
 N9+ N 0.31518 0.38751 0.54410  
 N10+ N 0.36502 0.11481 0.56868  
 N'11+ N 0.28054 0.10564 0.60821  
 O12+ O 0.16543 0.49956 0.72224  
 O13+ O 0.43069 -0.00493 0.56096  
 O14+ O 0.33551 0.51442 0.51443  
 N15+ N 0.47128 0.26119 0.49774  
 H\*16+ H 0.51962 0.16046 0.49257  
 H\*17+ H 0.48228 0.36623 0.47415  
 H\*18+ H 0.13874 0.54340 0.76612

#END

**S42.** Optimized crystal structure coordinates for 5 polymorphs of Hydroxylamine - 6-amino-3-(1-hydroxy-1*H*-tetrazole-5-yl)-1,2,4,5-tetrazine 1,5-dioxide (cocrystal form).

```

data_3b_q_1
_symmetry_cell_setting      monoclinic
_symmetry_space_group_name_H-M 'P 21/a'
_symmetry_Int_Tables_number 14
loop_
_symmetry_equiv_pos_site_id
_symmetry_equiv_pos_as_xyz
1 x,y,z
2 1/2-x,1/2+y,-z
3 -x,-y,-z
4 1/2+x,1/2-y,z
_cell_length_a              19.526
_cell_length_b              6.258
_cell_length_c              7.540
_cell_angle_alpha           90.00
_cell_angle_beta            96.11
_cell_angle_gamma           90.00
_cell_volume                 916.107
loop_
_atom_site_label
_atom_site_type_symbol
_atom_site_fract_x
_atom_site_fract_y
_atom_site_fract_z
N1 N -0.01451 -0.70374 -0.62524
H*2 H -0.01345 -0.71824 -0.75995
H*3 H -0.04522 -0.57471 -0.60809

```

O4 O 0.05392 -0.63004 -0.56200  
 H\*5 H 0.06922 -0.73527 -0.47292  
 C1+ C 0.62784 0.23446 -0.12147  
 N'2+ N 0.57095 0.27543 -0.23039  
 C3+ C 0.69809 0.21211 -0.17175  
 C4+ C 0.82290 0.17818 -0.26432  
 N'5+ N 0.51876 0.28434 -0.12806  
 N'6+ N 0.54059 0.25106 0.04000  
 N7+ N 0.60820 0.22068 0.04460  
 N'8+ N 0.74924 0.24813 -0.04278  
 N9+ N 0.81264 0.22852 -0.09225  
 N10+ N 0.76670 0.14506 -0.38707  
 N'11+ N 0.70256 0.16016 -0.34225  
 O12+ O 0.64800 0.17713 0.20035  
 O13+ O 0.77754 0.09832 -0.54355  
 O14+ O 0.86473 0.25717 0.01821  
 N15+ N 0.88661 0.16048 -0.31194  
 H\*16+ H 0.89195 0.12413 -0.44041  
 H\*17+ H 0.92663 0.18683 -0.21794  
 H\*18+ H 0.61466 0.16033 0.28669

#END

data\_3b\_q\_2  
 \_symmetry\_cell\_setting monoclinic  
 \_symmetry\_space\_group\_name\_H-M 'P 21/c'  
 \_symmetry\_Int\_Tables\_number 14  
 loop\_  
 \_symmetry\_equiv\_pos\_site\_id  
 \_symmetry\_equiv\_pos\_as\_xyz  
 1 x,y,z  
 2 -x,1/2+y,1/2-z  
 3 -x,-y,-z  
 4 x,1/2-y,1/2+z  
 \_cell\_length\_a 9.831  
 \_cell\_length\_b 6.401  
 \_cell\_length\_c 14.639  
 \_cell\_angle\_alpha 90.00  
 \_cell\_angle\_beta 98.14  
 \_cell\_angle\_gamma 90.00  
 \_cell\_volume 911.925  
 loop\_  
 \_atom\_site\_label  
 \_atom\_site\_type\_symbol  
 \_atom\_site\_fract\_x  
 \_atom\_site\_fract\_y  
 \_atom\_site\_fract\_z  
 N1 N 0.55082 0.14455 0.08479  
 H\*2 H 0.59309 0.01132 0.06251  
 H\*3 H 0.54533 0.12099 0.15324  
 O4 O 0.40918 0.13623 0.04178  
 H\*5 H 0.39793 0.26766 0.00928

C1+ C -0.26549 -0.13849 0.66967  
N'2+ N -0.38137 -0.12017 0.61062  
C3+ C -0.12543 -0.15523 0.64642  
C4+ C 0.12310 -0.17976 0.60320  
N'5+ N -0.48443 -0.10762 0.66160  
N'6+ N -0.43796 -0.11698 0.74989  
N7+ N -0.30226 -0.13552 0.75513  
N'8+ N -0.02389 -0.09734 0.71212  
N9+ N 0.10245 -0.11239 0.68901  
N10+ N 0.01145 -0.23490 0.54045  
N'11+ N -0.11620 -0.22488 0.56136  
O12+ O -0.21978 -0.15351 0.83797  
O13+ O 0.03330 -0.29687 0.46248  
O14+ O 0.20598 -0.06366 0.74556  
N15+ N 0.25000 -0.19269 0.58096  
H\*16+ H 0.26075 -0.24215 0.51677  
H\*17+ H 0.32946 -0.14997 0.62889  
H\*18+ H -0.28449 -0.16489 0.88234

#END

data\_3b\_q\_3  
\_symmetry\_cell\_setting monoclinic  
\_symmetry\_space\_group\_name\_H-M 'P 21/a'  
\_symmetry\_Int\_Tables\_number 14  
loop\_  
\_symmetry\_equiv\_pos\_site\_id  
\_symmetry\_equiv\_pos\_as\_xyz  
1 x,y,z  
2 1/2-x,1/2+y,-z  
3 -x,-y,-z  
4 1/2+x,1/2-y,z  
\_cell\_length\_a 6.776  
\_cell\_length\_b 8.572  
\_cell\_length\_c 15.757  
\_cell\_angle\_alpha 90.00  
\_cell\_angle\_beta 80.99  
\_cell\_angle\_gamma 90.00  
\_cell\_volume 903.935  
loop\_  
\_atom\_site\_label  
\_atom\_site\_type\_symbol  
\_atom\_site\_fract\_x  
\_atom\_site\_fract\_y  
\_atom\_site\_fract\_z  
N1 N -0.05166 -0.06380 0.25237  
H\*2 H -0.10281 -0.17225 0.27178  
H\*3 H 0.08418 -0.08141 0.21514  
O4 O -0.00257 0.00678 0.32973  
H\*5 H -0.07963 0.10192 0.33398  
C1+ C -0.09076 0.42902 0.34343  
N'2+ N -0.14846 0.29869 0.38658

C3+ C 0.00727 0.44047 0.25370  
 C4+ C 0.17735 0.45775 0.09321  
 N'5+ N -0.23264 0.34257 0.46586  
 N'6+ N -0.23031 0.49458 0.47406  
 N7+ N -0.14298 0.54853 0.39822  
 N'8+ N -0.01243 0.57641 0.21432  
 N9+ N 0.07669 0.58343 0.13254  
 N10+ N 0.18817 0.32295 0.13942  
 N'11+ N 0.10355 0.31207 0.22159  
 O12+ O -0.11180 0.70429 0.38397  
 O13+ O 0.28194 0.20980 0.10194  
 O14+ O 0.06935 0.70591 0.08928  
 N15+ N 0.26460 0.46632 0.01124  
 H\*16+ H 0.33654 0.37073 -0.01551  
 H\*17+ H 0.25267 0.56732 -0.02070  
 H\*18+ H -0.15194 0.75086 0.44042

#END

data\_3b\_q\_4  
 \_symmetry\_cell\_setting orthorhombic  
 \_symmetry\_space\_group\_name\_H-M 'P 21 21 21'  
 \_symmetry\_Int\_Tables\_number 19  
 loop\_  
 \_symmetry\_equiv\_pos\_site\_id  
 \_symmetry\_equiv\_pos\_as\_xyz  
 1 x,y,z  
 2 1/2+x,1/2-y,-z  
 3 -x,1/2+y,1/2-z  
 4 1/2-x,-y,1/2+z  
 \_cell\_length\_a 6.161  
 \_cell\_length\_b 12.628  
 \_cell\_length\_c 11.877  
 \_cell\_angle\_alpha 90.00  
 \_cell\_angle\_beta 90.00  
 \_cell\_angle\_gamma 90.00  
 \_cell\_volume 924.044  
 loop\_  
 \_atom\_site\_label  
 \_atom\_site\_type\_symbol  
 \_atom\_site\_fract\_x  
 \_atom\_site\_fract\_y  
 \_atom\_site\_fract\_z  
 N1 N 0.40896 0.50880 -0.08334  
 H\*2 H 0.51900 0.45957 -0.04582  
 H\*3 H 0.31467 0.46118 -0.13285  
 O4 O 0.53720 0.56848 -0.16311  
 H\*5 H 0.50662 0.64082 -0.14227  
 C1+ C 0.59162 -0.05324 -0.11250  
 N'2+ N 0.61449 -0.13820 -0.17822  
 C3+ C 0.69053 0.05132 -0.12948  
 C4+ C 0.86451 0.23743 -0.16317

N'5+ N 0.49460 -0.21560 -0.13188  
N'6+ N 0.39761 -0.18266 -0.04020  
N7+ N 0.45692 -0.08197 -0.02813  
N'8+ N 0.58990 0.13306 -0.08060  
N9+ N 0.68204 0.22742 -0.09807  
N10+ N 0.95496 0.14829 -0.21003  
N'11+ N 0.86954 0.05246 -0.19323  
O12+ O 0.38822 -0.02259 0.06103  
O13+ O 1.12254 0.15964 -0.26892  
O14+ O 0.60241 0.30987 -0.05552  
N15+ N 0.95391 0.33242 -0.18042  
H\*16+ H 1.08783 0.33645 -0.22944  
H\*17+ H 0.88210 0.39617 -0.14486  
H\*18+ H 0.31179 -0.07332 0.10841

#END

data\_3b\_q\_5  
\_symmetry\_cell\_setting triclinic  
\_symmetry\_space\_group\_name\_H-M 'P -1'  
\_symmetry\_Int\_Tables\_number 2  
loop\_  
\_symmetry\_equiv\_pos\_site\_id  
\_symmetry\_equiv\_pos\_as\_xyz  
1 x,y,z  
2 -x,-y,-z  
\_cell\_length\_a 9.840  
\_cell\_length\_b 7.494  
\_cell\_length\_c 6.456  
\_cell\_angle\_alpha 100.48  
\_cell\_angle\_beta 83.13  
\_cell\_angle\_gamma 97.18  
\_cell\_volume 462.163  
loop\_  
\_atom\_site\_label  
\_atom\_site\_type\_symbol  
\_atom\_site\_fract\_x  
\_atom\_site\_fract\_y  
\_atom\_site\_fract\_z  
N1 N -0.02731 -0.16252 0.31085  
H\*2 H -0.08875 -0.12115 0.44596  
H\*3 H -0.02489 -0.29955 0.30328  
O4 O 0.10935 -0.08452 0.36022  
H\*5 H 0.13976 -0.01566 0.24749  
C1+ C 0.25784 0.33642 0.22981  
N'2+ N 0.14565 0.22213 0.18668  
C3+ C 0.39782 0.28755 0.22921  
C4+ C 0.64666 0.19713 0.22202  
N'5+ N 0.04121 0.32513 0.20387  
N'6+ N 0.08330 0.49874 0.25552  
N7+ N 0.21759 0.50623 0.27114  
N'8+ N 0.50044 0.41831 0.20084

N9+ N 0.62681 0.37000 0.19917  
 N10+ N 0.53400 0.07248 0.24955  
 N'11+ N 0.40607 0.11625 0.25514  
 O12+ O 0.29536 0.66814 0.32718  
 O13+ O 0.55507 -0.08467 0.27094  
 O14+ O 0.73120 0.48226 0.17520  
 N15+ N 0.77370 0.15062 0.21868  
 H\*16+ H 0.78392 0.02143 0.23503  
 H\*17+ H 0.85397 0.24596 0.19729  
 H\*18+ H 0.22797 0.75649 0.36322

#END

**S43.** Optimized crystal structure coordinates for 5 polymorphs of Hydrazine - 6-amino-3-(1-hydroxy-1*H*-tetrazole-5-yl)-1,2,4,5-tetrazine 1,5-dioxide (cocrystal form).

```

data_3c_q_1
_symmetry_cell_setting      monoclinic
_symmetry_space_group_name_H-M 'P 21/c'
_symmetry_Int_Tables_number 14
loop_
_symmetry_equiv_pos_site_id
_symmetry_equiv_pos_as_xyz
1 x,y,z
2 -x,1/2+y,1/2-z
3 -x,-y,-z
4 x,1/2-y,1/2+z
_cell_length_a              15.926
_cell_length_b              8.822
_cell_length_c              6.787
_cell_angle_alpha           90.00
_cell_angle_beta            75.90
_cell_angle_gamma           90.00
_cell_volume                924.839
loop_
_atom_site_label
_atom_site_type_symbol
_atom_site_fract_x
_atom_site_fract_y
_atom_site_fract_z
N1 N -0.21818 0.06911 -0.26047
H*2 H -0.21788 0.09685 -0.11473
H*3 H -0.19469 0.15934 -0.35024
N4 N -0.30408 0.03914 -0.28263
H*5 H -0.31606 -0.07311 -0.25563
H*6 H -0.34985 0.09844 -0.18032
C1+ C 0.65993 -0.09871 0.26432
N'2+ N 0.61869 -0.23094 0.27093
C3+ C 0.75073 -0.07580 0.26911
C4+ C 0.91314 -0.03844 0.27296
N'5+ N 0.53740 -0.19897 0.26076
N'6+ N 0.52611 -0.05258 0.24778
  
```

N7+ N 0.60200 0.00985 0.24938  
N'8+ N 0.78723 0.05389 0.18931  
N9+ N 0.87005 0.07146 0.19397  
N10+ N 0.86967 -0.16808 0.35068  
N'11+ N 0.78659 -0.18891 0.35143  
O12+ O 0.61346 0.16325 0.24170  
O13+ O 0.91057 -0.26666 0.42283  
O14+ O 0.91085 0.18953 0.12453  
N15+ N 0.99609 -0.01957 0.27536  
H\*16+ H 1.02564 -0.10370 0.33406  
H\*17+ H 1.02592 0.07712 0.21606  
H\*18+ H 0.55547 0.20280 0.25156

#END

data\_3c\_q\_2  
\_symmetry\_cell\_setting monoclinic  
\_symmetry\_space\_group\_name\_H-M 'P 21/a'  
\_symmetry\_Int\_Tables\_number 14  
loop\_  
\_symmetry\_equiv\_pos\_site\_id  
\_symmetry\_equiv\_pos\_as\_xyz  
1 x,y,z  
2 1/2-x,1/2+y,-z  
3 -x,-y,-z  
4 1/2+x,1/2-y,z  
\_cell\_length\_a 16.720  
\_cell\_length\_b 9.061  
\_cell\_length\_c 6.321  
\_cell\_angle\_alpha 90.00  
\_cell\_angle\_beta 70.52  
\_cell\_angle\_gamma 90.00  
\_cell\_volume 902.814  
loop\_  
\_atom\_site\_label  
\_atom\_site\_type\_symbol  
\_atom\_site\_fract\_x  
\_atom\_site\_fract\_y  
\_atom\_site\_fract\_z  
N1 N -0.45563 0.64833 0.25667  
H\*2 H -0.45224 0.59211 0.11413  
H\*3 H -0.44445 0.57532 0.36571  
N4 N -0.53824 0.71087 0.36389  
H\*5 H -0.53849 0.81334 0.29858  
H\*6 H -0.58486 0.65069 0.33365  
C1+ C 0.40155 0.16354 0.31603  
N'2+ N 0.35253 0.04464 0.33579  
C3+ C 0.49465 0.16787 0.23073  
C4+ C 0.66039 0.17297 0.07315  
N'5+ N 0.27182 0.09150 0.41844  
N'6+ N 0.26830 0.23447 0.45084  
N7+ N 0.34860 0.27951 0.38694

N<sup>8+</sup> N 0.52991 0.29746 0.14981  
N<sup>9+</sup> N 0.61467 0.29821 0.07154  
N<sup>10+</sup> N 0.61790 0.04505 0.15948  
N<sup>11+</sup> N 0.53333 0.04035 0.24216  
O<sup>12+</sup> O 0.36898 0.42409 0.40192  
O<sup>13+</sup> O 0.66133 -0.06791 0.15975  
O<sup>14+</sup> O 0.65474 0.41426 -0.00715  
N<sup>15+</sup> N 0.74509 0.17530 -0.00701  
H\*<sup>16+</sup> H 0.77644 0.08036 -0.00377  
H\*<sup>17+</sup> H 0.77402 0.27141 -0.06989  
H\*<sup>18+</sup> H 0.31455 0.47052 0.47989

#END

data\_3c\_q\_3  
\_symmetry\_cell\_setting orthorhombic  
\_symmetry\_space\_group\_name\_H-M 'P b c a'  
\_symmetry\_Int\_Tables\_number 61  
loop\_  
\_symmetry\_equiv\_pos\_site\_id  
\_symmetry\_equiv\_pos\_as\_xyz  
1 x,y,z  
2 1/2-x,1/2+y,z  
3 x,1/2-y,1/2+z  
4 1/2-x,-y,1/2+z  
5 -x,-y,-z  
6 1/2+x,1/2-y,-z  
7 -x,1/2+y,1/2-z  
8 1/2+x,y,1/2-z  
\_cell\_length\_a 31.112  
\_cell\_length\_b 8.856  
\_cell\_length\_c 6.811  
\_cell\_angle\_alpha 90.00  
\_cell\_angle\_beta 90.00  
\_cell\_angle\_gamma 90.00  
\_cell\_volume 1876.62  
loop\_  
\_atom\_site\_label  
\_atom\_site\_type\_symbol  
\_atom\_site\_fract\_x  
\_atom\_site\_fract\_y  
\_atom\_site\_fract\_z  
N1 N 0.64263 0.93071 0.10452  
H\*2 H 0.64207 0.90095 -0.04013  
H\*3 H 0.65625 0.84430 0.18064  
N4 N 0.60018 0.95359 0.18194  
H\*5 H 0.59236 1.06382 0.16031  
H\*6 H 0.57781 0.88921 0.11131  
C1+ C 0.07941 0.39268 0.35025  
N<sup>2+</sup> N 0.05874 0.26128 0.33386  
C3+ C 0.12467 0.41469 0.40413  
C4+ C 0.20562 0.45048 0.49581

N'5+ N 0.01826 0.29388 0.28004  
 N'6+ N 0.01276 0.43984 0.26181  
 N7+ N 0.05063 0.50137 0.30469  
 N'8+ N 0.14277 0.54382 0.34504  
 N9+ N 0.18405 0.56060 0.39447  
 N10+ N 0.18405 0.32147 0.54908  
 N'11+ N 0.14264 0.30143 0.50488  
 O12+ O 0.05649 0.65411 0.30407  
 O13+ O 0.20451 0.22267 0.64248  
 O14+ O 0.20431 0.67808 0.34794  
 N15+ N 0.24697 0.46855 0.54306  
 H\*16+ H 0.26176 0.38430 0.61703  
 H\*17+ H 0.26176 0.56481 0.50061  
 H\*18+ H 0.02768 0.69397 0.28282

#END

data\_3c\_q\_4  
 \_symmetry\_cell\_setting orthorhombic  
 \_symmetry\_space\_group\_name\_H-M 'P b c a'  
 \_symmetry\_Int\_Tables\_number 61  
 loop\_  
 \_symmetry\_equiv\_pos\_site\_id  
 \_symmetry\_equiv\_pos\_as\_xyz  
 1 x,y,z  
 2 1/2-x,1/2+y,z  
 3 x,1/2-y,1/2+z  
 4 1/2-x,-y,1/2+z  
 5 -x,-y,-z  
 6 1/2+x,1/2-y,-z  
 7 -x,1/2+y,1/2-z  
 8 1/2+x,y,1/2-z  
 \_cell\_length\_a 31.826  
 \_cell\_length\_b 8.671  
 \_cell\_length\_c 6.840  
 \_cell\_angle\_alpha 90.00  
 \_cell\_angle\_beta 90.00  
 \_cell\_angle\_gamma 90.00  
 \_cell\_volume 1887.59  
 loop\_  
 \_atom\_site\_label  
 \_atom\_site\_type\_symbol  
 \_atom\_site\_fract\_x  
 \_atom\_site\_fract\_y  
 \_atom\_site\_fract\_z  
 N1 N 0.59632 0.44344 -0.22228  
 H\*2 H 0.57803 0.36790 -0.29866  
 H\*3 H 0.59089 0.55085 -0.27629  
 N4 N 0.64032 0.41144 -0.24564  
 H\*5 H 0.64876 0.33583 -0.13902  
 H\*6 H 0.64673 0.36128 -0.37721  
 C1+ C 0.08107 0.88606 -0.19541

N'2+ N 0.06211 0.75392 -0.14855  
 C3+ C 0.12637 0.91788 -0.18960  
 C4+ C 0.20724 0.97026 -0.18238  
 N'5+ N 0.02078 0.77570 -0.17706  
 N'6+ N 0.01311 0.91558 -0.23996  
 N7+ N 0.05043 0.98414 -0.25201  
 N'8+ N 0.14003 1.03191 -0.30472  
 N9+ N 0.18139 1.05774 -0.29801  
 N10+ N 0.19001 0.85520 -0.06991  
 N'11+ N 0.14877 0.82728 -0.07047  
 O12+ O 0.05426 1.13409 -0.31003  
 O13+ O 0.21437 0.77721 0.03525  
 O14+ O 0.19773 1.16291 -0.39906  
 N15+ N 0.24856 0.99689 -0.17822  
 H\*16+ H 0.26656 0.92925 -0.09169  
 H\*17+ H 0.26006 1.08220 -0.26360  
 H\*18+ H 0.02530 1.16959 -0.31999

#END

data\_3c\_q\_5  
 \_symmetry\_cell\_setting monoclinic  
 \_symmetry\_space\_group\_name\_H-M 'P 21/a'  
 \_symmetry\_Int\_Tables\_number 14  
 loop\_  
 \_symmetry\_equiv\_pos\_site\_id  
 \_symmetry\_equiv\_pos\_as\_xyz  
 1 x,y,z  
 2 1/2-x,1/2+y,-z  
 3 -x,-y,-z  
 4 1/2+x,1/2-y,z  
 \_cell\_length\_a 16.669  
 \_cell\_length\_b 9.091  
 \_cell\_length\_c 6.311  
 \_cell\_angle\_alpha 90.00  
 \_cell\_angle\_beta 109.31  
 \_cell\_angle\_gamma 90.00  
 \_cell\_volume 902.554  
 loop\_  
 \_atom\_site\_label  
 \_atom\_site\_type\_symbol  
 \_atom\_site\_fract\_x  
 \_atom\_site\_fract\_y  
 \_atom\_site\_fract\_z  
 N1 N 0.46044 -0.34579 0.68934  
 H\*2 H 0.45914 -0.39726 0.83180  
 H\*3 H 0.45045 -0.42325 0.56711  
 N4 N 0.54141 -0.27867 0.71837  
 H\*5 H 0.53944 -0.17452 0.77514  
 H\*6 H 0.58992 -0.33268 0.83455  
 C1+ C -0.09730 0.66626 0.12114  
 N'2+ N -0.14531 0.54803 0.04225

C3+ C -0.00435 0.67027 0.22268  
 C4+ C 0.16134 0.67484 0.39791  
 N'5+ N -0.22620 0.59495 -0.03686  
 N'6+ N -0.23080 0.73732 -0.01113  
 N7+ N -0.15099 0.78191 0.08618  
 N'8+ N 0.03292 0.79954 0.21579  
 N9+ N 0.11755 0.80001 0.30759  
 N10+ N 0.11690 0.54726 0.39576  
 N'11+ N 0.03226 0.54283 0.30852  
 O12+ O -0.13190 0.92578 0.14230  
 O13+ O 0.15855 0.43434 0.48039  
 O14+ O 0.15935 0.91575 0.31218  
 N15+ N 0.24600 0.67690 0.48780  
 H\*16+ H 0.27593 0.58202 0.55167  
 H\*17+ H 0.27643 0.77276 0.48542  
 H\*18+ H -0.18734 0.97209 0.11047

#END

**S44.** Optimized crystal structure coordinates for 5 polymorphs of Guanidine - 6-amino-3-(1-hydroxy-1*H*-tetrazole-5-yl)-1,2,4,5-tetrazine 1,5-dioxide (cocrystal form).

data\_3d\_q\_1  
 \_symmetry\_cell\_setting triclinic  
 \_symmetry\_space\_group\_name\_H-M 'P -1'  
 \_symmetry\_Int\_Tables\_number 2  
 loop\_  
 \_symmetry\_equiv\_pos\_site\_id  
 \_symmetry\_equiv\_pos\_as\_xyz  
 1 x,y,z  
 2 -x,-y,-z  
 \_cell\_length\_a 14.898  
 \_cell\_length\_b 7.615  
 \_cell\_length\_c 5.722  
 \_cell\_angle\_alpha 64.58  
 \_cell\_angle\_beta 116.43  
 \_cell\_angle\_gamma 92.10  
 \_cell\_volume 515.365  
 loop\_  
 \_atom\_site\_label  
 \_atom\_site\_type\_symbol  
 \_atom\_site\_fract\_x  
 \_atom\_site\_fract\_y  
 \_atom\_site\_fract\_z  
 C1 C 0.20282 -0.29932 0.26061  
 N'2 N 0.11123 -0.33204 0.18015  
 H\*3 H 0.09931 -0.42889 0.09422  
 N4 N 0.23131 -0.15461 0.35341  
 H\*5 H 0.30196 -0.19169 0.52763  
 H\*6 H 0.17665 -0.10117 0.37832  
 N7 N 0.28354 -0.39619 0.27105  
 H\*8 H 0.26263 -0.48284 0.16947

H\*9 H 0.33197 -0.30974 0.21973  
C1+ C 0.58734 -0.24635 0.08537  
N'2+ N 0.51630 -0.27158 -0.13777  
C3+ C 0.69422 -0.23616 0.15425  
C4+ C 0.88351 -0.21382 0.26775  
N'5+ N 0.42976 -0.26980 -0.11847  
N'6+ N 0.44360 -0.24426 0.10667  
N7+ N 0.54111 -0.22912 0.23298  
N'8+ N 0.74113 -0.14185 0.31293  
N9+ N 0.83804 -0.13318 0.37057  
N10+ N 0.82834 -0.30710 0.10536  
N'11+ N 0.73184 -0.32131 0.04667  
O12+ O 0.58302 -0.20483 0.48076  
O13+ O 0.87196 -0.38036 0.01486  
O14+ O 0.88997 -0.04934 0.51991  
N15+ N 0.98026 -0.20283 0.32573  
H\*16+ H 1.01081 -0.26335 0.24457  
H\*17+ H 1.01820 -0.13235 0.44500  
H\*18+ H 0.52897 -0.21824 0.53561

#END

data\_3d\_q\_2  
\_symmetry\_cell\_setting monoclinic  
\_symmetry\_space\_group\_name\_H-M 'P 21/c'  
\_symmetry\_Int\_Tables\_number 14  
loop\_  
\_symmetry\_equiv\_pos\_site\_id  
\_symmetry\_equiv\_pos\_as\_xyz  
1 x,y,z  
2 -x,1/2+y,1/2-z  
3 -x,-y,-z  
4 x,1/2-y,1/2+z  
\_cell\_length\_a 8.802  
\_cell\_length\_b 11.209  
\_cell\_length\_c 13.809  
\_cell\_angle\_alpha 90.00  
\_cell\_angle\_beta 131.22  
\_cell\_angle\_gamma 90.00  
\_cell\_volume 1024.79  
loop\_  
\_atom\_site\_label  
\_atom\_site\_type\_symbol  
\_atom\_site\_fract\_x  
\_atom\_site\_fract\_y  
\_atom\_site\_fract\_z  
C1 C 0.70248 0.35159 -0.08917  
N'2 N 0.61820 0.36530 -0.04151  
H\*3 H 0.58104 0.45241 -0.04513  
N4 N 0.78501 0.24170 -0.08039  
H\*5 H 0.76130 0.21718 -0.16009  
H\*6 H 0.74949 0.17674 -0.04721

N7 N 0.72287 0.43696 -0.15386  
H\*8 H 0.68937 0.52123 -0.14721  
H\*9 H 0.85252 0.43179 -0.13823  
C1+ C 0.11785 0.33906 0.71560  
N'2+ N 0.03018 0.24859 0.72542  
C3+ C 0.21221 0.33515 0.65907  
C4+ C 0.37494 0.32638 0.55510  
N'5+ N -0.03702 0.29224 0.78184  
N'6+ N 0.00456 0.40604 0.80751  
N7+ N 0.10004 0.43541 0.76624  
N'8+ N 0.22453 0.43892 0.61690  
N9+ N 0.30945 0.43283 0.56494  
N10+ N 0.35454 0.22458 0.60108  
N'11+ N 0.27315 0.22726 0.65530  
O12+ O 0.16976 0.54839 0.77994  
O13+ O 0.41650 0.12835 0.59133  
O14+ O 0.33037 0.52502 0.52287  
N15+ N 0.45837 0.32165 0.50217  
H\*16+ H 0.50381 0.24127 0.49616  
H\*17+ H 0.47004 0.39841 0.46902  
H\*18+ H 0.14551 0.58866 0.83117

#END

data\_3d\_q\_3  
\_symmetry\_cell\_setting monoclinic  
\_symmetry\_space\_group\_name\_H-M 'P 21/c'  
\_symmetry\_Int\_Tables\_number 14  
loop\_  
\_symmetry\_equiv\_pos\_site\_id  
\_symmetry\_equiv\_pos\_as\_xyz  
1 x,y,z  
2 -x,1/2+y,1/2-z  
3 -x,-y,-z  
4 x,1/2-y,1/2+z  
\_cell\_length\_a 7.440  
\_cell\_length\_b 19.239  
\_cell\_length\_c 7.559  
\_cell\_angle\_alpha 90.00  
\_cell\_angle\_beta 97.91  
\_cell\_angle\_gamma 90.00  
\_cell\_volume 1071.69  
loop\_  
\_atom\_site\_label  
\_atom\_site\_type\_symbol  
\_atom\_site\_fract\_x  
\_atom\_site\_fract\_y  
\_atom\_site\_fract\_z  
C1 C 0.54260 -0.35246 0.03964  
N'2 N 0.60020 -0.28953 0.03882  
H\*3 H 0.72862 -0.28524 0.10550  
N4 N 0.36302 -0.36806 -0.02697

H\*5 H 0.34539 -0.41262 -0.09880  
H\*6 H 0.29758 -0.32688 -0.08978  
N7 N 0.64196 -0.41152 0.10077  
H\*8 H 0.76478 -0.40125 0.17114  
H\*9 H 0.57153 -0.44797 0.15955  
C1+ C 0.13001 0.63213 0.29002  
N'2+ N -0.02359 0.66555 0.23052  
C3+ C 0.15811 0.55659 0.29593  
C4+ C 0.20556 0.42194 0.30099  
N'5+ N 0.01252 0.73380 0.24806  
N'6+ N 0.18199 0.74447 0.31564  
N7+ N 0.25531 0.68156 0.34133  
N'8+ N 0.32894 0.53477 0.29783  
N9+ N 0.35071 0.46583 0.30172  
N10+ N 0.03510 0.44972 0.29825  
N'11+ N 0.00811 0.51832 0.29688  
O12+ O 0.43213 0.67287 0.41425  
O13+ O -0.09538 0.40837 0.29835  
O14+ O 0.50563 0.43938 0.30512  
N15+ N 0.22944 0.35312 0.30379  
H\*16+ H 0.11869 0.32254 0.30223  
H\*17+ H 0.35686 0.33467 0.30507  
H\*18+ H 0.47214 0.71976 0.44877

#END

data\_3d\_q\_4  
\_symmetry\_cell\_setting monoclinic  
\_symmetry\_space\_group\_name\_H-M 'P 21/c'  
\_symmetry\_Int\_Tables\_number 14  
loop\_  
\_symmetry\_equiv\_pos\_site\_id  
\_symmetry\_equiv\_pos\_as\_xyz  
1 x,y,z  
2 -x,1/2+y,1/2-z  
3 -x,-y,-z  
4 x,1/2-y,1/2+z  
\_cell\_length\_a 5.334  
\_cell\_length\_b 18.074  
\_cell\_length\_c 11.263  
\_cell\_angle\_alpha 90.00  
\_cell\_angle\_beta 103.79  
\_cell\_angle\_gamma 90.00  
\_cell\_volume 1054.53  
loop\_  
\_atom\_site\_label  
\_atom\_site\_type\_symbol  
\_atom\_site\_fract\_x  
\_atom\_site\_fract\_y  
\_atom\_site\_fract\_z  
C1 C 0.28910 0.08367 0.27227  
N'2 N 0.18599 0.05084 0.34999

H\*3 H 0.03219 0.07992 0.36468  
 N4 N 0.51897 0.05734 0.24967  
 H\*5 H 0.52799 0.05876 0.16081  
 H\*6 H 0.57004 0.00765 0.28980  
 N7 N 0.19556 0.14593 0.20174  
 H\*8 H 0.04923 0.17225 0.22707  
 H\*9 H 0.33282 0.18109 0.18672  
 C1+ C 0.50858 0.30554 0.07696  
 N'2+ N 0.31880 0.29453 0.13364  
 C3+ C 0.63244 0.24944 0.01582  
 C4+ C 0.84541 0.14876 -0.09492  
 N'5+ N 0.26346 0.36080 0.17497  
 N'6+ N 0.41009 0.41272 0.14643  
 N7+ N 0.56173 0.37868 0.08538  
 N'8+ N 0.74616 0.27412 -0.07023  
 N9+ N 0.85556 0.22195 -0.12519  
 N10+ N 0.72269 0.12916 -0.00531  
 N'11+ N 0.61428 0.17975 0.05292  
 O12+ O 0.74471 0.41629 0.04311  
 O13+ O 0.71708 0.06178 0.02097  
 O14+ O 0.96982 0.23877 -0.20697  
 N15+ N 0.95434 0.09721 -0.15124  
 H\*16+ H 0.94142 0.04380 -0.12665  
 H\*17+ H 1.04199 0.11381 -0.21700  
 H\*18+ H 0.74065 0.46578 0.07687

#END

data\_3d\_q\_5  
 \_symmetry\_cell\_setting orthorhombic  
 \_symmetry\_space\_group\_name\_H-M 'P 21 21 21'  
 \_symmetry\_Int\_Tables\_number 19  
 loop\_  
 \_symmetry\_equiv\_pos\_site\_id  
 \_symmetry\_equiv\_pos\_as\_xyz  
 1 x,y,z  
 2 1/2+x,1/2-y,-z  
 3 -x,1/2+y,1/2-z  
 4 1/2-x,-y,1/2+z  
 \_cell\_length\_a 11.234  
 \_cell\_length\_b 6.712  
 \_cell\_length\_c 14.350  
 \_cell\_angle\_alpha 90.00  
 \_cell\_angle\_beta 90.00  
 \_cell\_angle\_gamma 90.00  
 \_cell\_volume 1082.03  
 loop\_  
 \_atom\_site\_label  
 \_atom\_site\_type\_symbol  
 \_atom\_site\_fract\_x  
 \_atom\_site\_fract\_y  
 \_atom\_site\_fract\_z

```

C1 C 0.20615 -0.21782 -0.15950
N'2 N 0.25567 -0.21731 -0.24020
H*3 H 0.19655 -0.17884 -0.29109
N4 N 0.26805 -0.28773 -0.08191
H*5 H 0.25562 -0.20792 -0.02274
H*6 H 0.35504 -0.31319 -0.09623
N7 N 0.09151 -0.15214 -0.13702
H*8 H 0.03875 -0.12542 -0.19276
H*9 H 0.04986 -0.23120 -0.08642
C1+ C -0.32361 -0.25067 0.78282
N'2+ N -0.29312 -0.27414 0.87200
C3+ C -0.24257 -0.23083 0.70309
C4+ C -0.09632 -0.20062 0.56212
N'5+ N -0.39497 -0.28775 0.92060
N'6+ N -0.48772 -0.27412 0.86566
N7+ N -0.44379 -0.25168 0.78019
N'8+ N -0.28703 -0.28024 0.61984
N9+ N -0.21126 -0.26247 0.54855
N10+ N -0.05930 -0.15407 0.65073
N'11+ N -0.13279 -0.16717 0.72355
O12+ O -0.51634 -0.22880 0.70465
O13+ O 0.04628 -0.09706 0.66116
O14+ O -0.24355 -0.30341 0.46690
N15+ N -0.02144 -0.18482 0.49020
H*16+ H 0.06278 -0.13961 0.50325
H*17+ H -0.05189 -0.22115 0.42612
H*18+ H -0.59561 -0.21854 0.73175

```

#END

**S45.** Optimized crystal structure coordinates for 5 polymorphs of Aminoguanidine - 6-amino-3-(1-hydroxy-1*H*-tetrazole-5-yl)-1,2,4,5-tetrazine 1,5-dioxide (cocrystal form).

```

data_3e_q_1
_symmetry_cell_setting      triclinic
_symmetry_space_group_name_H-M 'P -1'
_symmetry_Int_Tables_number 2
loop_
_symmetry_equiv_pos_site_id
_symmetry_equiv_pos_as_xyz
1 x,y,z
2 -x,-y,-z
_cell_length_a              9.970
_cell_length_b              11.313
_cell_length_c              9.070
_cell_angle_alpha           48.57
_cell_angle_beta            44.75
_cell_angle_gamma           59.33
_cell_volume                 538.426
loop_
_atom_site_label
_atom_site_type_symbol

```

```

_atom_site_fract_x
_atom_site_fract_y
_atom_site_fract_z
C1 C 0.28745 -0.40439 -0.05557
N2 N 0.33705 -0.31399 -0.04833
H*3 H 0.36383 -0.20157 -0.18845
N'4 N 0.36319 -0.54750 -0.01022
N5 N 0.15787 -0.32841 -0.11346
H*6 H 0.06188 -0.24959 -0.05498
H*7 H 0.09853 -0.40734 -0.06920
N8 N 0.27965 -0.62869 0.00022
H*9 H 0.37021 -0.62199 -0.16374
H*10 H 0.28992 -0.74502 0.11716
H*11 H 0.44524 -0.36950 -0.02811
C1+ C -0.38911 0.11062 0.67387
N'2+ N -0.38215 -0.02597 0.70771
C3+ C -0.26062 0.15355 0.65686
C4+ C -0.02700 0.22832 0.62149
N'5+ N -0.52456 -0.01333 0.70924
N'6+ N -0.61996 0.12525 0.67747
N7+ N -0.53603 0.20252 0.65481
N'8+ N -0.24662 0.30816 0.53975
N9+ N -0.12765 0.34410 0.52502
N10+ N -0.05124 0.07261 0.73769
N'11+ N -0.17079 0.03194 0.75916
O12+ O -0.60147 0.35184 0.62337
O13+ O 0.04210 -0.03106 0.82523
O14+ O -0.10415 0.48581 0.42048
N15+ N 0.09229 0.26618 0.60394
H*16+ H 0.16457 0.17721 0.67649
H*17+ H 0.10678 0.38206 0.51629
H*18+ H -0.71878 0.37153 0.64206

```

#END

```

data_3e_q_2
_symmetry_cell_setting      monoclinic
_symmetry_space_group_name_H-M 'P 21/a'
_symmetry_Int_Tables_number 14
loop_
_symmetry_equiv_pos_site_id
_symmetry_equiv_pos_as_xyz
1 x,y,z
2 1/2-x,1/2+y,-z
3 -x,-y,-z
4 1/2+x,1/2-y,z
_cell_length_a              12.767
_cell_length_b              17.603
_cell_length_c              5.032
_cell_angle_alpha           90.00
_cell_angle_beta            102.11
_cell_angle_gamma           90.00

```

```

_cell_volume          1105.71
loop_
_atom_site_label
_atom_site_type_symbol
_atom_site_fract_x
_atom_site_fract_y
_atom_site_fract_z
C1 C 0.34489 0.58182 0.99062
N2 N 0.24109 0.55935 1.00132
H*3 H 0.22866 0.55379 1.19301
N'4 N 0.39400 0.54807 0.82365
N5 N 0.38615 0.63993 1.16716
H*6 H 0.33086 0.67781 1.20226
H*7 H 0.45121 0.66397 1.11355
N8 N 0.49555 0.58423 0.81880
H*9 H 0.55361 0.55319 0.94336
H*10 H 0.50797 0.57498 0.62806
H*11 H 0.21882 0.51215 0.88786
C1+ C 0.28470 0.29915 0.64035
N'2+ N 0.20279 0.28301 0.75743
C3+ C 0.35001 0.24472 0.52467
C4+ C 0.46337 0.14672 0.31438
N'5+ N 0.16603 0.34960 0.83094
N'6+ N 0.22129 0.40662 0.76452
N7+ N 0.29471 0.37555 0.64567
N'8+ N 0.39997 0.27191 0.33643
N9+ N 0.45813 0.22114 0.23274
N10+ N 0.40857 0.12449 0.50885
N'11+ N 0.35083 0.17374 0.62011
O12+ O 0.36848 0.41886 0.55408
O13+ O 0.41507 0.05607 0.58073
O14+ O 0.50926 0.24040 0.05558
N15+ N 0.52134 0.09655 0.20751
H*16+ H 0.52267 0.04211 0.27230
H*17+ H 0.56019 0.11504 0.06420
H*18+ H 0.35645 0.46980 0.61718

```

#END

```

data_3e_q_3
_symmetry_cell_setting      triclinic
_symmetry_space_group_name_H-M 'P -1'
_symmetry_Int_Tables_number 2
loop_
_symmetry_equiv_pos_site_id
_symmetry_equiv_pos_as_xyz
1 x,y,z
2 -x,-y,-z
_cell_length_a              13.838
_cell_length_b              8.157
_cell_length_c              6.882
_cell_angle_alpha           135.29

```

```

_cell_angle_beta      87.11
_cell_angle_gamma    99.01
_cell_volume         537.686
loop_
_atom_site_label
_atom_site_type_symbol
_atom_site_fract_x
_atom_site_fract_y
_atom_site_fract_z
C1 C 0.24975 0.19616 0.02887
N2 N 0.30097 0.01530 -0.07945
H*3 H 0.27075 -0.08679 -0.05023
N'4 N 0.29810 0.40613 0.16779
N5 N 0.14867 0.12962 -0.02497
H*6 H 0.12557 -0.03927 -0.20887
H*7 H 0.11729 0.25174 0.00811
N8 N 0.23423 0.56363 0.23736
H*9 H 0.21773 0.65942 0.43675
H*10 H 0.27743 0.68302 0.24738
H*11 H 0.37333 0.07817 -0.01189
C1+ C 0.13384 0.38802 0.65602
N'2+ N 0.06007 0.20860 0.48283
C3+ C 0.23837 0.37329 0.65336
C4+ C 0.42428 0.34268 0.63978
N'5+ N -0.02232 0.30250 0.55882
N'6+ N -0.00321 0.53272 0.77159
N7+ N 0.09355 0.58634 0.83185
N'8+ N 0.30202 0.56998 0.77139
N9+ N 0.39666 0.55146 0.76424
N10+ N 0.35291 0.15027 0.52338
N'11+ N 0.25759 0.16264 0.52976
O12+ O 0.13937 0.81375 1.04885
O13+ O 0.38022 -0.03852 0.41169
O14+ O 0.46306 0.72571 0.87070
N15+ N 0.51922 0.32661 0.63284
H*16+ H 0.53650 0.16906 0.53780
H*17+ H 0.56954 0.47183 0.71984
H*18+ H 0.08531 0.90163 1.14038

```

#END

```

data_3e_q_4
_symmetry_cell_setting      orthorhombic
_symmetry_space_group_name_H-M 'P 21 21 21'
_symmetry_Int_Tables_number 19
loop_
_symmetry_equiv_pos_site_id
_symmetry_equiv_pos_as_xyz
1 x,y,z
2 1/2+x,1/2-y,-z
3 -x,1/2+y,1/2-z
4 1/2-x,-y,1/2+z

```

```

_cell_length_a      11.956
_cell_length_b      5.252
_cell_length_c      18.239
_cell_angle_alpha   90.00
_cell_angle_beta    90.00
_cell_angle_gamma   90.00
_cell_volume        1145.28
loop_
_atom_site_label
_atom_site_type_symbol
_atom_site_fract_x
_atom_site_fract_y
_atom_site_fract_z
C1 C -0.27872 0.51757 -0.19168
N2 N -0.38182 0.44273 -0.22025
H*3 H -0.44253 0.42258 -0.18182
N'4 N -0.18868 0.40558 -0.21417
N5 N -0.28380 0.71067 -0.14011
H*6 H -0.34634 0.83766 -0.14841
H*7 H -0.20730 0.79136 -0.13242
N8 N -0.08928 0.52628 -0.18486
H*9 H -0.06465 0.42090 -0.14055
H*10 H -0.02878 0.49679 -0.22322
H*11 H -0.37441 0.28558 -0.25223
C1+ C -0.25184 0.73536 0.61674
N'2+ N -0.35902 0.73198 0.59640
C3+ C -0.16066 0.58191 0.58583
C4+ C 0.00060 0.31083 0.52861
N'5+ N -0.41228 0.90323 0.63850
N'6+ N -0.34302 1.01368 0.68417
N7+ N -0.24346 0.91057 0.67068
N'8+ N -0.05734 0.67479 0.59414
N9+ N 0.02404 0.53275 0.56502
N10+ N -0.10871 0.23258 0.52289
N'11+ N -0.19219 0.36729 0.55215
O12+ O -0.15076 0.97860 0.70972
O13+ O -0.12781 0.02810 0.48952
O14+ O 0.12461 0.60037 0.56995
N15+ N 0.08284 0.17177 0.49940
H*16+ H 0.06196 0.00993 0.47267
H*17+ H 0.16215 0.23619 0.50453
H*18+ H -0.18013 1.09015 0.74780

```

#END

```

data_3e_q_5
_symmetry_cell_setting      monoclinic
_symmetry_space_group_name_H-M 'P 21/c'
_symmetry_Int_Tables_number 14
loop_
_symmetry_equiv_pos_site_id
_symmetry_equiv_pos_as_xyz

```

```

1 x,y,z
2 -x,1/2+y,1/2-z
3 -x,-y,-z
4 x,1/2-y,1/2+z
_cell_length_a          7.967
_cell_length_b          16.552
_cell_length_c          8.433
_cell_angle_alpha       90.00
_cell_angle_beta        98.53
_cell_angle_gamma       90.00
_cell_volume            1099.76
loop_
_atom_site_label
_atom_site_type_symbol
_atom_site_fract_x
_atom_site_fract_y
_atom_site_fract_z
C1 C 0.20422 0.49592 0.18691
N2 N 0.11441 0.47081 0.30806
H*3 H 0.09075 0.41057 0.30732
N'4 N 0.15621 0.56037 0.10592
N5 N 0.34018 0.44724 0.16487
H*6 H 0.39936 0.42084 0.26640
H*7 H 0.41971 0.47631 0.09993
N8 N 0.27461 0.58207 -0.00189
H*9 H 0.22574 0.56034 -0.11268
H*10 H 0.26613 0.64325 -0.01279
H*11 H 0.00734 0.50389 0.30880
C1+ C 0.34056 -0.18056 -0.09117
N'2+ N 0.21856 -0.23643 -0.11161
C3+ C 0.49393 -0.17825 -0.16845
C4+ C 0.76390 -0.17457 -0.31062
N'5+ N 0.10258 -0.21437 -0.01946
N'6+ N 0.14668 -0.14711 0.05743
N7+ N 0.29388 -0.12588 0.01290
N'8+ N 0.56562 -0.10576 -0.17829
N9+ N 0.70414 -0.10516 -0.25027
N10+ N 0.68032 -0.24606 -0.29476
N'11+ N 0.54296 -0.24933 -0.22161
O12+ O 0.37935 -0.05846 0.07295
O13+ O 0.73814 -0.30879 -0.35054
O14+ O 0.78289 -0.04047 -0.26531
N15+ N 0.90194 -0.17289 -0.38315
H*16+ H 0.94140 -0.22536 -0.42673
H*17+ H 0.95953 -0.11907 -0.39301
H*18+ H 0.31428 -0.03955 0.15476

```

#END

**S46.** Optimized crystal structure coordinates for 5 polymorphs of Diaminoguanidine - 6-amino-3-(1-hydroxy-1*H*-tetrazole-5-yl)-1,2,4,5-tetrazine 1,5-dioxide (cocrystal form).

```

data_3f_q_1
_symmetry_cell_setting      monoclinic
_symmetry_space_group_name_H-M 'P 21/a'
_symmetry_Int_Tables_number 14
loop_
_symmetry_equiv_pos_site_id
_symmetry_equiv_pos_as_xyz
1 x,y,z
2 1/2-x,1/2+y,-z
3 -x,-y,-z
4 1/2+x,1/2-y,z
_cell_length_a              18.763
_cell_length_b              12.585
_cell_length_c              5.086
_cell_angle_alpha           90.00
_cell_angle_beta            86.79
_cell_angle_gamma           90.00
_cell_volume                1199.08
loop_
_atom_site_label
_atom_site_type_symbol
_atom_site_fract_x
_atom_site_fract_y
_atom_site_fract_z
C1 C 0.08890 -0.26451 0.15662
N'2 N 0.06404 -0.30465 -0.05341
N3 N 0.08351 -0.15532 0.20410
H*4 H 0.12801 -0.12439 0.27873
N5 N 0.12333 -0.32054 0.34744
N6 N 0.05873 -0.08867 0.00368
N7 N 0.06989 -0.41895 -0.05799
H*8 H 0.11936 -0.43793 -0.13954
H*9 H 0.07249 -0.12248 -0.17507
H*10 H 0.00439 -0.09054 0.02078
H*11 H 0.03494 -0.44364 -0.19108
H*12 H 0.11611 -0.28986 0.53135
H*13 H 0.11203 -0.39951 0.33863
C1+ C 0.63581 0.21083 0.57836
N'2+ N 0.65885 0.11143 0.60708
C3+ C 0.66630 0.30744 0.68860
C4+ C 0.72269 0.47841 0.88198
N'5+ N 0.61598 0.04877 0.47183
N'6+ N 0.56725 0.10470 0.35958
N7+ N 0.57952 0.20520 0.42463
N'8+ N 0.65314 0.39837 0.56445
N9+ N 0.68195 0.48499 0.66723
N10+ N 0.73320 0.38082 0.99454
N'11+ N 0.70449 0.29267 0.89995
O12+ O 0.53741 0.28608 0.34439
O13+ O 0.77050 0.37710 1.19166
O14+ O 0.67268 0.57506 0.56794
N15+ N 0.75149 0.56566 0.98140

```

H\*16+ H 0.78149 0.55731 1.13917  
H\*17+ H 0.74275 0.63594 0.89245  
H\*18+ H 0.49899 0.24971 0.25980

#END

data\_3f\_q\_2  
\_symmetry\_cell\_setting monoclinic  
\_symmetry\_space\_group\_name\_H-M 'P 21/c'  
\_symmetry\_Int\_Tables\_number 14  
loop\_  
\_symmetry\_equiv\_pos\_site\_id  
\_symmetry\_equiv\_pos\_as\_xyz  
1 x,y,z  
2 -x,1/2+y,1/2-z  
3 -x,-y,-z  
4 x,1/2-y,1/2+z  
\_cell\_length\_a 8.936  
\_cell\_length\_b 19.210  
\_cell\_length\_c 6.934  
\_cell\_angle\_alpha 90.00  
\_cell\_angle\_beta 92.40  
\_cell\_angle\_gamma 90.00  
\_cell\_volume 1189.25  
loop\_  
\_atom\_site\_label  
\_atom\_site\_type\_symbol  
\_atom\_site\_fract\_x  
\_atom\_site\_fract\_y  
\_atom\_site\_fract\_z  
C1 C -0.20910 0.06681 0.10995  
N'2 N -0.20093 0.00533 0.18531  
N3 N -0.07872 0.10550 0.08581  
H\*4 H -0.09126 0.15664 0.11757  
N5 N -0.34009 0.10087 0.05069  
N6 N 0.05882 0.07987 0.16699  
N7 N -0.34542 -0.02818 0.18531  
H\*8 H -0.39633 -0.01347 0.30838  
H\*9 H 0.03672 0.05110 0.28679  
H\*10 H 0.09943 0.04539 0.07056  
H\*11 H -0.32313 -0.07979 0.20257  
H\*12 H -0.32825 0.13380 -0.06194  
H\*13 H -0.42598 0.06656 0.02945  
C1+ C 0.08010 0.81437 0.39637  
N'2+ N 0.00524 0.75749 0.33848  
C3+ C 0.23473 0.81748 0.47628  
C4+ C 0.51144 0.82174 0.61384  
N'5+ N -0.13111 0.77873 0.27421  
N'6+ N -0.14459 0.84639 0.28917  
N7+ N -0.01373 0.86866 0.36433  
N'8+ N 0.30510 0.87847 0.45992  
N9+ N 0.44602 0.87980 0.53228

N10+ N 0.42936 0.76144 0.62288  
N'11+ N 0.28761 0.75830 0.55469  
O12+ O 0.01137 0.93740 0.40355  
O13+ O 0.49179 0.70911 0.69900  
O14+ O 0.52276 0.93454 0.52626  
N15+ N 0.65275 0.82379 0.68446  
H\*16+ H 0.69709 0.77973 0.74258  
H\*17+ H 0.70964 0.86906 0.67446  
H\*18+ H -0.08615 0.95895 0.37819

#END

data\_3f\_q\_3  
\_symmetry\_cell\_setting triclinic  
\_symmetry\_space\_group\_name\_H-M 'P -1'  
\_symmetry\_Int\_Tables\_number 2  
loop\_  
\_symmetry\_equiv\_pos\_site\_id  
\_symmetry\_equiv\_pos\_as\_xyz  
1 x,y,z  
2 -x,-y,-z  
\_cell\_length\_a 15.807  
\_cell\_length\_b 10.181  
\_cell\_length\_c 4.930  
\_cell\_angle\_alpha 53.44  
\_cell\_angle\_beta 105.19  
\_cell\_angle\_gamma 86.19  
\_cell\_volume 589.127  
loop\_  
\_atom\_site\_label  
\_atom\_site\_type\_symbol  
\_atom\_site\_fract\_x  
\_atom\_site\_fract\_y  
\_atom\_site\_fract\_z  
C1 C 0.38031 0.17970 -0.37763  
N'2 N 0.38874 0.26951 -0.27222  
N3 N 0.30316 0.12124 -0.39748  
H\*4 H 0.31830 0.00023 -0.30814  
N5 N 0.44351 0.12969 -0.47150  
N6 N 0.24093 0.14377 -0.25740  
N7 N 0.46919 0.32812 -0.29488  
H\*8 H 0.52307 0.23465 -0.05647  
H\*9 H 0.27644 0.14293 -0.05007  
H\*10 H 0.19756 0.26404 -0.45766  
H\*11 H 0.45835 0.42693 -0.29234  
H\*12 H 0.41536 0.11782 -0.66316  
H\*13 H 0.48660 0.20432 -0.53326  
C1+ C 0.72118 0.30277 0.22345  
N'2+ N 0.66581 0.20269 0.30126  
C3+ C 0.79954 0.28866 0.12604  
C4+ C 0.93735 0.26314 -0.05519  
N'5+ N 0.60342 0.26244 0.37060

N'6+ N 0.61732 0.39559 0.33895  
N7+ N 0.69010 0.42120 0.24677  
N'8+ N 0.82459 0.43094 -0.06417  
N9+ N 0.89555 0.41512 -0.15201  
N10+ N 0.90603 0.12444 0.13944  
N'11+ N 0.83617 0.13447 0.23683  
O12+ O 0.72534 0.54948 0.19714  
O13+ O 0.94578 -0.01339 0.22586  
O14+ O 0.92552 0.54025 -0.32846  
N15+ N 1.00786 0.24968 -0.14704  
H\*16+ H 1.03650 0.13552 -0.07194  
H\*17+ H 1.02869 0.35478 -0.29146  
H\*18+ H 0.69007 0.59602 0.27155

#END

data\_3f\_q\_4  
\_symmetry\_cell\_setting monoclinic  
\_symmetry\_space\_group\_name\_H-M 'P 21/a'  
\_symmetry\_Int\_Tables\_number 14  
loop\_  
\_symmetry\_equiv\_pos\_site\_id  
\_symmetry\_equiv\_pos\_as\_xyz  
1 x,y,z  
2 1/2-x,1/2+y,-z  
3 -x,-y,-z  
4 1/2+x,1/2-y,z  
\_cell\_length\_a 10.521  
\_cell\_length\_b 9.469  
\_cell\_length\_c 12.449  
\_cell\_angle\_alpha 90.00  
\_cell\_angle\_beta 76.71  
\_cell\_angle\_gamma 90.00  
\_cell\_volume 1207  
loop\_  
\_atom\_site\_label  
\_atom\_site\_type\_symbol  
\_atom\_site\_fract\_x  
\_atom\_site\_fract\_y  
\_atom\_site\_fract\_z  
C1 C 0.19101 0.42833 0.72473  
N'2 N 0.15219 0.37702 0.64153  
N3 N 0.31500 0.48909 0.70924  
H\*4 H 0.36071 0.46413 0.77009  
N5 N 0.12040 0.42726 0.83363  
N6 N 0.40230 0.47727 0.60427  
N7 N 0.01875 0.32854 0.67256  
H\*8 H 0.01972 0.22645 0.69938  
H\*9 H 0.38153 0.38586 0.56784  
H\*10 H 0.38021 0.55692 0.55665  
H\*11 H -0.01149 0.32257 0.60074  
H\*12 H 0.13923 0.51040 0.87891

H\*13 H 0.02345 0.41287 0.83809  
C1+ C 0.64801 0.08509 0.26471  
N'2+ N 0.54612 0.16012 0.24977  
C3+ C 0.73707 -0.00046 0.18175  
C4+ C 0.89605 -0.14926 0.03177  
N'5+ N 0.49348 0.22248 0.34670  
N'6+ N 0.55815 0.18984 0.42146  
N7+ N 0.65420 0.10502 0.37082  
N'8+ N 0.85555 -0.02422 0.20006  
N9+ N 0.93510 -0.10131 0.12295  
N10+ N 0.77213 -0.11846 0.02060  
N'11+ N 0.68915 -0.04348 0.09659  
O12+ O 0.74057 0.04791 0.42538  
O13+ O 0.73868 -0.16414 -0.06348  
O14+ O 1.04862 -0.13121 0.13190  
N15+ N 0.97703 -0.22547 -0.04493  
H\*16+ H 0.94466 -0.25823 -0.11122  
H\*17+ H 1.06759 -0.24546 -0.03395  
H\*18+ H 0.70596 0.07578 0.50184

#END

data\_3f\_q\_5  
\_symmetry\_cell\_setting triclinic  
\_symmetry\_space\_group\_name\_H-M 'P -1'  
\_symmetry\_Int\_Tables\_number 2  
loop\_  
\_symmetry\_equiv\_pos\_site\_id  
\_symmetry\_equiv\_pos\_as\_xyz  
1 x,y,z  
2 -x,-y,-z  
\_cell\_length\_a 9.876  
\_cell\_length\_b 10.444  
\_cell\_length\_c 12.003  
\_cell\_angle\_alpha 107.52  
\_cell\_angle\_beta 120.65  
\_cell\_angle\_gamma 120.11  
\_cell\_volume 611.358  
loop\_  
\_atom\_site\_label  
\_atom\_site\_type\_symbol  
\_atom\_site\_fract\_x  
\_atom\_site\_fract\_y  
\_atom\_site\_fract\_z  
C1 C 0.18844 -0.00703 -0.11849  
N'2 N 0.22750 -0.07559 -0.04881  
N3 N 0.19282 -0.03183 -0.23730  
H\*4 H 0.28403 0.10264 -0.20882  
N5 N 0.14530 0.09765 -0.08349  
N6 N 0.27275 -0.10678 -0.25911  
N7 N 0.19670 -0.05038 0.05804  
H\*8 H 0.37263 0.10739 0.19891

H\*9 H 0.40198 -0.05635 -0.13452  
 H\*10 H 0.11269 -0.27648 -0.36637  
 H\*11 H 0.16910 -0.15367 0.06556  
 H\*12 H 0.02959 0.06762 -0.19527  
 H\*13 H 0.08525 0.06743 -0.03624  
 C1+ C 0.09500 0.34822 0.74119  
 N'2+ N -0.03631 0.20506 0.73370  
 C3+ C 0.23968 0.37412 0.72190  
 C4+ C 0.49059 0.41307 0.68242  
 N'5+ N -0.14012 0.23700 0.75605  
 N'6+ N -0.07972 0.39358 0.77687  
 N7+ N 0.06538 0.46242 0.76718  
 N'8+ N 0.27510 0.46330 0.66388  
 N9+ N 0.40536 0.48338 0.64590  
 N10+ N 0.44315 0.32274 0.74073  
 N'11+ N 0.31699 0.30278 0.76306  
 O12+ O 0.16775 0.62981 0.78715  
 O13+ O 0.52423 0.26050 0.77396  
 O14+ O 0.45184 0.56654 0.59364  
 N15+ N 0.61913 0.43302 0.66260  
 H\*16+ H 0.67755 0.37810 0.69002  
 H\*17+ H 0.64937 0.49956 0.61871  
 H\*18+ H 0.12469 0.68347 0.82196

#END

**S47.** Optimized crystal structure coordinates for 5 polymorphs of Triaminoguanidine - 6-amino-3-(1-hydroxy-1*H*-tetrazole-5-yl)-1,2,4,5-tetrazine 1,5-dioxide (cocrystal form).

```

data_3g_q_1
_symmetry_cell_setting      monoclinic
_symmetry_space_group_name_H-M 'P 21/a'
_symmetry_Int_Tables_number 14
loop_
_symmetry_equiv_pos_site_id
_symmetry_equiv_pos_as_xyz
1 x,y,z
2 1/2-x,1/2+y,-z
3 -x,-y,-z
4 1/2+x,1/2-y,z
_cell_length_a              13.029
_cell_length_b              8.681
_cell_length_c              11.496
_cell_angle_alpha           90.00
_cell_angle_beta            108.34
_cell_angle_gamma           90.00
_cell_volume                1234.21
loop_
_atom_site_label
_atom_site_type_symbol
_atom_site_fract_x
_atom_site_fract_y

```

```

_atom_site_fract_z
C1 C 0.47644 0.41197 -0.35551
N'2 N 0.44514 0.30613 -0.43887
N3 N 0.33017 0.27909 -0.47192
N4 N 0.40506 0.49620 -0.31198
N5 N 0.45019 0.58101 -0.20240
N6 N 0.58494 0.44722 -0.30667
N7 N 0.65781 0.39695 -0.36738
H*8 H 0.31746 0.17838 -0.51946
H*9 H 0.29120 0.36162 -0.53375
H*10 H 0.33710 0.43328 -0.31967
H*11 H 0.40364 0.67573 -0.20554
H*12 H 0.45230 0.51705 -0.12727
H*13 H 0.60180 0.55237 -0.26752
H*14 H 0.67268 0.28322 -0.34678
H*15 H 0.61866 0.39928 -0.45983
C1+ C 0.45154 -0.02815 0.24188
N'2+ N 0.35900 -0.10694 0.21329
C3+ C 0.53709 -0.04305 0.18455
C4+ C 0.68697 -0.06931 0.07890
N'5+ N 0.30488 -0.05548 0.28753
N'6+ N 0.35948 0.05216 0.36109
N7+ N 0.45029 0.06967 0.33279
N'8+ N 0.60175 0.07899 0.19390
N9+ N 0.67834 0.06303 0.14013
N10+ N 0.61604 -0.18801 0.07429
N'11+ N 0.53942 -0.17733 0.12833
O12+ O 0.52820 0.17197 0.39380
O13+ O 0.62600 -0.30815 0.01803
O14+ O 0.74434 0.16997 0.14380
N15+ N 0.76356 -0.08312 0.02496
H*16+ H 0.76684 -0.18235 -0.01980
H*17+ H 0.81395 0.00698 0.03000
H*18+ H 0.50269 0.20954 0.45968

```

#END

```

data_3g_q_2
_symmetry_cell_setting      monoclinic
_symmetry_space_group_name_H-M 'P 21/a'
_symmetry_Int_Tables_number 14
loop_
_symmetry_equiv_pos_site_id
_symmetry_equiv_pos_as_xyz
1 x,y,z
2 1/2-x,1/2+y,-z
3 -x,-y,-z
4 1/2+x,1/2-y,z
_cell_length_a              9.859
_cell_length_b              17.205
_cell_length_c              7.692
_cell_angle_alpha           90.00

```

```

_cell_angle_beta      82.56
_cell_angle_gamma     90.00
_cell_volume          1293.76
loop_
_atom_site_label
_atom_site_type_symbol
_atom_site_fract_x
_atom_site_fract_y
_atom_site_fract_z
C1 C 0.33101 0.68371 -0.42936
N'2 N 0.27063 0.75059 -0.43262
N3 N 0.36226 0.80956 -0.51330
N4 N 0.46457 0.67048 -0.50769
N5 N 0.52889 0.60140 -0.46014
N6 N 0.26213 0.62110 -0.34745
N7 N 0.11837 0.62431 -0.30621
H*8 H 0.31425 0.86089 -0.48157
H*9 H 0.36638 0.80478 -0.64662
H*10 H 0.52001 0.72066 -0.51153
H*11 H 0.59582 0.58383 -0.56426
H*12 H 0.58068 0.61040 -0.35541
H*13 H 0.29900 0.56815 -0.38595
H*14 H 0.09799 0.65745 -0.19607
H*15 H 0.07979 0.65535 -0.40230
C1+ C -0.08444 0.11189 0.90623
N'2+ N -0.18042 0.08545 0.81396
C3+ C 0.06245 0.09426 0.87624
C4+ C 0.32398 0.06338 0.81734
N'5+ N -0.29947 0.11680 0.88553
N'6+ N -0.28200 0.16174 1.01827
N7+ N -0.14877 0.15900 1.03114
N'8+ N 0.14534 0.14608 0.93777
N9+ N 0.27853 0.12904 0.90756
N10+ N 0.23014 0.01396 0.75901
N'11+ N 0.09612 0.02839 0.78875
O12+ O -0.09390 0.19845 1.15927
O13+ O 0.27448 -0.04591 0.67734
O14+ O 0.36596 0.17330 0.96055
N15+ N 0.45754 0.04741 0.78725
H*16+ H 0.48688 -0.00142 0.71943
H*17+ H 0.52341 0.08535 0.83170
H*18+ H -0.17352 0.21931 1.23267

```

#END

```

data_3g_q_3
_symmetry_cell_setting      monoclinic
_symmetry_space_group_name_H-M 'P 21/a'
_symmetry_Int_Tables_number 14
loop_
_symmetry_equiv_pos_site_id
_symmetry_equiv_pos_as_xyz

```

1 x,y,z  
 2 1/2-x,1/2+y,-z  
 3 -x,-y,-z  
 4 1/2+x,1/2-y,z  
 \_cell\_length\_a 10.055  
 \_cell\_length\_b 10.069  
 \_cell\_length\_c 13.876  
 \_cell\_angle\_alpha 90.00  
 \_cell\_angle\_beta 63.97  
 \_cell\_angle\_gamma 90.00  
 \_cell\_volume 1262.36  
 loop\_  
 \_atom\_site\_label  
 \_atom\_site\_type\_symbol  
 \_atom\_site\_fract\_x  
 \_atom\_site\_fract\_y  
 \_atom\_site\_fract\_z  
 C1 C 0.18968 0.57687 0.64937  
 N'2 N 0.10273 0.61936 0.60931  
 N3 N -0.01078 0.70608 0.68292  
 N4 N 0.17979 0.61964 0.74783  
 N5 N 0.25629 0.54385 0.79370  
 N6 N 0.29972 0.48618 0.59333  
 N7 N 0.34110 0.46499 0.48320  
 H\*8 H -0.08652 0.71413 0.65314  
 H\*9 H 0.03331 0.79918 0.67675  
 H\*10 H 0.07400 0.64782 0.79705  
 H\*11 H 0.28809 0.60586 0.83746  
 H\*12 H 0.19047 0.47108 0.84250  
 H\*13 H 0.38462 0.48262 0.61370  
 H\*14 H 0.26250 0.40517 0.47830  
 H\*15 H 0.33180 0.55328 0.45000  
 C1+ C 0.10629 0.61314 0.25470  
 N'2+ N 0.01444 0.69805 0.24064  
 C3+ C 0.20558 0.51770 0.17601  
 C4+ C 0.38388 0.35091 0.03352  
 N'5+ N -0.05341 0.76674 0.33245  
 N'6+ N -0.00779 0.72860 0.40316  
 N7+ N 0.09151 0.63367 0.35511  
 N'8+ N 0.32268 0.47795 0.19009  
 N9+ N 0.41194 0.39199 0.11695  
 N10+ N 0.26053 0.39823 0.02613  
 N'11+ N 0.16755 0.48273 0.09844  
 O12+ O 0.16072 0.56889 0.40683  
 O13+ O 0.23712 0.35859 -0.05083  
 O14+ O 0.52496 0.34704 0.12256  
 N15+ N 0.47470 0.26556 -0.03933  
 H\*16+ H 0.45045 0.23825 -0.09994  
 H\*17+ H 0.56461 0.23339 -0.03136  
 H\*18+ H 0.11098 0.60223 0.48004

#END

```

data_3g_q_4
_symmetry_cell_setting      monoclinic
_symmetry_space_group_name_H-M 'P 21/c'
_symmetry_Int_Tables_number 14
loop_
_symmetry_equiv_pos_site_id
_symmetry_equiv_pos_as_xyz
1 x,y,z
2 -x,1/2+y,1/2-z
3 -x,-y,-z
4 x,1/2-y,1/2+z
_cell_length_a              8.173
_cell_length_b              18.850
_cell_length_c              8.310
_cell_angle_alpha           90.00
_cell_angle_beta            86.17
_cell_angle_gamma           90.00
_cell_volume                 1277.39
loop_
_atom_site_label
_atom_site_type_symbol
_atom_site_fract_x
_atom_site_fract_y
_atom_site_fract_z
C1 C -0.20520 0.51222 0.59038
N'2 N -0.19561 0.45145 0.66244
N3 N -0.26987 0.39551 0.57362
N4 N -0.26799 0.52010 0.43953
N5 N -0.30730 0.58990 0.39183
N6 N -0.14975 0.57295 0.66214
N7 N -0.04743 0.56699 0.79193
H*8 H -0.28241 0.35412 0.65190
H*9 H -0.18687 0.37895 0.48360
H*10 H -0.35129 0.48111 0.42119
H*11 H -0.29048 0.59291 0.26983
H*12 H -0.42610 0.60222 0.42593
H*13 H -0.12174 0.61389 0.58670
H*14 H -0.12122 0.55500 0.89200
H*15 H 0.02572 0.52328 0.77269
C1+ C 0.11249 0.28859 -0.06231
N'2+ N 0.04475 0.22444 -0.07142
C3+ C 0.27062 0.30574 0.00231
C4+ C 0.55441 0.33458 0.11450
N'5+ N -0.09824 0.23329 -0.13971
N'6+ N -0.12264 0.30014 -0.17385
N7+ N 0.00797 0.33453 -0.12645
N'8+ N 0.34213 0.36589 -0.05072
N9+ N 0.48648 0.38000 0.00883
N10+ N 0.47097 0.27390 0.16099
N'11+ N 0.32542 0.25844 0.10599
O12+ O 0.02245 0.40641 -0.14123

```

O13+ O 0.53565 0.23336 0.25839  
O14+ O 0.56438 0.43540 -0.03159  
N15+ N 0.69931 0.34922 0.17217  
H\*16+ H 0.74555 0.31416 0.24925  
H\*17+ H 0.75720 0.39426 0.13461  
H\*18+ H -0.08311 0.42108 -0.17791

#END

data\_3g\_q\_5  
\_symmetry\_cell\_setting triclinic  
\_symmetry\_space\_group\_name\_H-M 'P -1'  
\_symmetry\_Int\_Tables\_number 2  
loop\_  
\_symmetry\_equiv\_pos\_site\_id  
\_symmetry\_equiv\_pos\_as\_xyz  
1 x,y,z  
2 -x,-y,-z  
\_cell\_length\_a 10.035  
\_cell\_length\_b 18.380  
\_cell\_length\_c 6.035  
\_cell\_angle\_alpha 57.27  
\_cell\_angle\_beta 111.24  
\_cell\_angle\_gamma 71.95  
\_cell\_volume 666.972  
loop\_  
\_atom\_site\_label  
\_atom\_site\_type\_symbol  
\_atom\_site\_fract\_x  
\_atom\_site\_fract\_y  
\_atom\_site\_fract\_z  
C1 C 0.47880 0.76562 0.88849  
N'2 N 0.48703 0.71738 1.15399  
N3 N 0.43445 0.64890 1.19783  
N4 N 0.43860 0.74519 0.69172  
N5 N 0.39067 0.82178 0.36375  
N6 N 0.51308 0.84014 0.79164  
N7 N 0.60091 0.84252 1.02813  
H\*8 H 0.41299 0.63216 1.36606  
H\*9 H 0.54804 0.57227 1.33031  
H\*10 H 0.35815 0.72255 0.69897  
H\*11 H 0.43362 0.77883 0.31466  
H\*12 H 0.24977 0.88688 0.16540  
H\*13 H 0.55116 0.85215 0.64893  
H\*14 H 0.50126 0.88697 1.01494  
H\*15 H 0.69467 0.76194 1.27864  
C1+ C -0.11004 0.35243 0.44966  
N'2+ N -0.24590 0.38463 0.45670  
C3+ C -0.03856 0.27112 0.44414  
C4+ C 0.08299 0.12809 0.42593  
N'5+ N -0.26672 0.46056 0.45608  
N'6+ N -0.15000 0.47730 0.44843

N7+ N -0.05305 0.41064 0.44344  
N'8+ N 0.04496 0.28080 0.31255  
N9+ N 0.10738 0.20647 0.30774  
N10+ N -0.00552 0.12553 0.55517  
N'11+ N -0.06747 0.19729 0.56901  
O12+ O 0.08538 0.40489 0.44154  
O13+ O -0.02537 0.05261 0.66301  
O14+ O 0.18949 0.20706 0.19212  
N15+ N 0.14516 0.05482 0.41733  
H\*16+ H 0.12354 -0.00129 0.50538  
H\*17+ H 0.20895 0.05966 0.31911  
H\*18+ H 0.09664 0.45024 0.47180

#END
